# Supplementary material for: Ecosystem biomonitoring with eDNA: metabarcoding across the tree of life in a tropical marine environment
Source: PubMed Central journal article supplement (PMC5612959; doi:10.1038/s41598-017-12501-5), 2017-09-25
Supplement: 41598_2017_12501_MOESM1_ESM.pdf [file 41598_2017_12501_MOESM1_ESM.pdf]

# Ecosystem biomonitoring with eDNA: metabarcoding across the tree of life in a tropical marine environment

Michael Stat, Megan J. Huggett, Rachele Bernasconi, Joseph D. DiBattista, Tina Berry, Stephen J. Newman, Euan S Harvey, Michael Bunce

## Supplementary Data 1

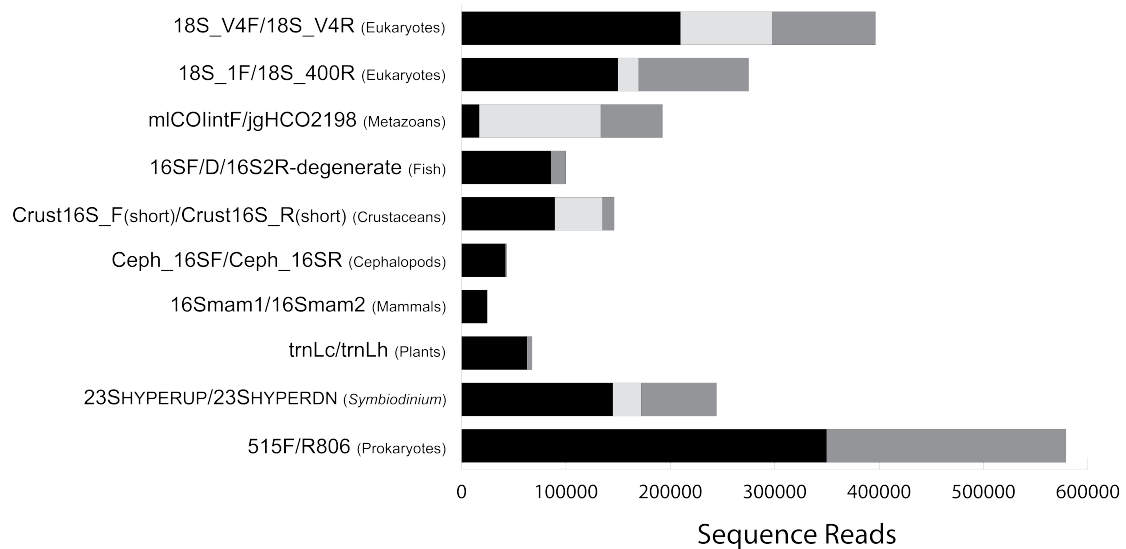

**Number of sequence reads per primer set used in assigning taxa from replicate seawater samples collected at Coral Bay in West Australia using eDNA metabarcoding.** Bar graphs indicate the total number of sequence reads recovered using each primer set. Within each bar, black segments represent the number of reads that passed quality filtering and could be assigned a taxon; the light shaded grey represents the number of reads that passed quality filtering but could not be assigned a taxon; and the dark shaded grey represents the number of sequences removed after quality filtering. The target taxa of each primer set is indicated in brackets following the primer name.

## Supplementary Data 2

The mean number and standard deviation of sequences passing quality filtering, unique sequences, and taxa for the ten metabarcoding assays used in this study across the nine water samples collected at Coral Bay, West Australia.

| <b>Assay</b>                        | <b># Sequences <math>\pm</math> SD</b> | <b># Unique Sequences <math>\pm</math> SD</b> | <b># Taxa <math>\pm</math> SD</b> |
|-------------------------------------|----------------------------------------|-----------------------------------------------|-----------------------------------|
| 18S_V4 (Eukaryotes) <sup>a</sup>    | 12277 $\pm$ 3529                       | 757 $\pm$ 147                                 | 53 $\pm$ 8                        |
| 18S_V1-V3 (Eukaryotes) <sup>b</sup> | 6230 $\pm$ 3202                        | 477 $\pm$ 171                                 | 42 $\pm$ 5                        |
| COI (Metazoans) <sup>c</sup>        | 6457 $\pm$ 598                         | 716 $\pm$ 61                                  | 33 $\pm$ 5                        |
| 16S (Fish)                          | 9507 $\pm$ 1869                        | 301 $\pm$ 43                                  | 23 $\pm$ 4                        |
| 16S (Crustaceans)                   | 14998 $\pm$ 3096                       | 221 $\pm$ 62                                  | 14 $\pm$ 5                        |
| 16S (Cephalopods)                   | 4652 $\pm$ 1639                        | 63 $\pm$ 11                                   | 8 $\pm$ 4                         |
| trnL (Plants)                       | 7901 $\pm$ 2224                        | 182 $\pm$ 54                                  | 4 $\pm$ 1                         |
| 16S (Mammals)                       | 2702 $\pm$ 593                         | 31 $\pm$ 9                                    | 3 $\pm$ 1                         |
| 23S ( <i>Symbiodinium</i> )         | 19118 $\pm$ 2512                       | 382 $\pm$ 65                                  | 6 $\pm$ 1 (clades)                |
| 16S (Prokaryotes)                   | 38843 $\pm$ 16208                      | 2247 $\pm$ 726                                | 195 $\pm$ 54 (OTUs)               |

<sup>a</sup> represents the sequences and taxa recovered when using an annealing temperature of 50° C.

<sup>b</sup> represents the sequences and taxa recovered when using an annealing temperature of 52° C.

<sup>c</sup> represents the sequences and taxa recovered when using an annealing temperature of 46° C.

Supplementary Data 3 - All eukaryotic taxa

| Count | Kingdom  | Phylum     | Class             | Order                | Family            | Genus                     | Species             |
|-------|----------|------------|-------------------|----------------------|-------------------|---------------------------|---------------------|
| 1     | Animalia | Annelida   | Phascolosomatidea | Phascolosomatiformes | Phascolosomatidae | <i>Phascolosoma</i>       |                     |
| 2     | Animalia | Annelida   | Polychaeta        | Capitellida          | Capitellidae      | <i>Dasybranchus</i>       |                     |
| 3     | Animalia | Annelida   | Polychaeta        | Eunicida             | Dorvilleidae      | <i>Dorvillea</i>          |                     |
| 4     | Animalia | Annelida   | Polychaeta        | Eunicida             | Eunicidae         | <i>Eunice</i>             |                     |
| 5     | Animalia | Annelida   | Polychaeta        | Phyllodocida         | Chrysopetalidae   | <i>Chrysopetalum</i>      |                     |
| 6     | Animalia | Annelida   | Polychaeta        | Phyllodocida         | Hesionidae        |                           |                     |
| 7     | Animalia | Annelida   | Polychaeta        | Phyllodocida         | Nereididae        | <i>Ceratonereis</i>       |                     |
| 8     | Animalia | Annelida   | Polychaeta        | Phyllodocida         | Syllidae          | <i>Branchiosyllis</i>     |                     |
| 9     | Animalia | Annelida   | Polychaeta        | Phyllodocida         | Syllidae          | <i>Erinaceusyllis</i>     |                     |
| 10    | Animalia | Annelida   | Polychaeta        | Phyllodocida         | Syllidae          | <i>Exogone</i>            |                     |
| 11    | Animalia | Annelida   | Polychaeta        | Phyllodocida         | Syllidae          | <i>Salvatoria</i>         |                     |
| 12    | Animalia | Annelida   | Polychaeta        | Sabellida            | Fabriciidae       | <i>Fabricinuda</i>        |                     |
| 13    | Animalia | Annelida   | Polychaeta        | Sabellida            | Fabriciidae       | <i>Pseudofabriciola</i>   |                     |
| 14    | Animalia | Annelida   | Polychaeta        | Sabellida            | Sabellidae        |                           |                     |
| 15    | Animalia | Annelida   | Polychaeta        | Sabellida            | Serpulidae        |                           |                     |
| 16    | Animalia | Annelida   | Polychaeta        | Spionida             | Chaetopteridae    | <i>Phyllochaetopterus</i> |                     |
| 17    | Animalia | Annelida   | Polychaeta        | Spionida             | Spionidae         | <i>Aurospio</i>           |                     |
| 18    | Animalia | Annelida   | Polychaeta        | Spionida             | Spionidae         | <i>Spio</i>               |                     |
| 19    | Animalia | Annelida   | Polychaeta        | Terebellida          | Terebellidae      |                           |                     |
| 20    | Animalia | Annelida   | Polychaeta        |                      | Opheliidae        |                           |                     |
| 21    | Animalia | Annelida   | Polychaeta        |                      | Orbiniidae        |                           |                     |
| 22    | Animalia | Annelida   | Polychaeta        |                      | Protodrilidae     | <i>Protodrilus</i>        |                     |
| 23    | Animalia | Arthropoda | Insecta           | Blattodea            |                   |                           |                     |
| 24    | Animalia | Arthropoda | Insecta           | Coleoptera           | Endomychidae      |                           |                     |
| 25    | Animalia | Arthropoda | Insecta           | Hemiptera            | Cicadellidae      | <i>Opsius</i>             |                     |
| 26    | Animalia | Arthropoda | Insecta           | Hymenoptera          | Formicidae        | <i>Pheidole</i>           |                     |
| 27    | Animalia | Arthropoda | Insecta           | Orthoptera           | Acrididae         |                           |                     |
| 28    | Animalia | Arthropoda | Malacostraca      | Decapoda             | Alpheidae         | <i>Alpheus</i>            |                     |
| 29    | Animalia | Arthropoda | Malacostraca      | Decapoda             | Axiidae           | <i>Axiopsis</i>           |                     |
| 30    | Animalia | Arthropoda | Malacostraca      | Decapoda             | Callinassidae     |                           |                     |
| 31    | Animalia | Arthropoda | Malacostraca      | Decapoda             | Diogenidae        | <i>Calcinus</i>           | <i>latens</i>       |
| 32    | Animalia | Arthropoda | Malacostraca      | Decapoda             | Diogenidae        | <i>Clibanarius</i>        |                     |
| 33    | Animalia | Arthropoda | Malacostraca      | Decapoda             | Domeciidae        |                           |                     |
| 34    | Animalia | Arthropoda | Malacostraca      | Decapoda             | Dromiidae         |                           |                     |
| 35    | Animalia | Arthropoda | Malacostraca      | Decapoda             | Epiplatinae       |                           |                     |
| 36    | Animalia | Arthropoda | Malacostraca      | Decapoda             | Galatheididae     |                           |                     |
| 37    | Animalia | Arthropoda | Malacostraca      | Decapoda             | Grapsidae         | <i>Grapsus</i>            | <i>albolineatus</i> |
| 38    | Animalia | Arthropoda | Malacostraca      | Decapoda             | Grapsidae         | <i>Pachygrapsus</i>       | <i>minutus</i>      |
| 39    | Animalia | Arthropoda | Malacostraca      | Decapoda             | Hippolytidae      | <i>Hippolyte</i>          |                     |
| 40    | Animalia | Arthropoda | Malacostraca      | Decapoda             | Macrophthalmidae  | <i>Macrophthalmus</i>     |                     |
| 41    | Animalia | Arthropoda | Malacostraca      | Decapoda             | Majidae           | <i>Micippa</i>            | <i>platipes</i>     |
| 42    | Animalia | Arthropoda | Malacostraca      | Decapoda             | Majidae           | <i>Schizophrys</i>        |                     |
| 43    | Animalia | Arthropoda | Malacostraca      | Decapoda             | Majidae           | <i>Tiarinia</i>           |                     |
| 44    | Animalia | Arthropoda | Malacostraca      | Decapoda             | Matutoidea        | <i>Ashtoret</i>           |                     |
| 45    | Animalia | Arthropoda | Malacostraca      | Decapoda             | Munididae         |                           |                     |
| 46    | Animalia | Arthropoda | Malacostraca      | Decapoda             | Palaemonidae      | <i>Coralliocaris</i>      |                     |
| 47    | Animalia | Arthropoda | Malacostraca      | Decapoda             | Penaeidae         | <i>Melicertus</i>         |                     |
| 48    | Animalia | Arthropoda | Malacostraca      | Decapoda             | Percnidae         | <i>Percnon</i>            |                     |
| 49    | Animalia | Arthropoda | Malacostraca      | Decapoda             | Pilumnidae        |                           |                     |
| 50    | Animalia | Arthropoda | Malacostraca      | Decapoda             | Portunidae        | <i>Carupa</i>             |                     |
| 51    | Animalia | Arthropoda | Malacostraca      | Decapoda             | Portunidae        | <i>Charybdis</i>          |                     |
| 52    | Animalia | Arthropoda | Malacostraca      | Decapoda             | Portunidae        | <i>Libystes</i>           |                     |
| 53    | Animalia | Arthropoda | Malacostraca      | Decapoda             | Portunidae        | <i>Portunus</i>           | <i>pelagicus</i>    |
| 54    | Animalia | Arthropoda | Malacostraca      | Decapoda             | Portunidae        | <i>Thalamita</i>          | <i>admete</i>       |
| 55    | Animalia | Arthropoda | Malacostraca      | Decapoda             | Tetraliidae       | <i>Tetralia</i>           |                     |
| 56    | Animalia | Arthropoda | Malacostraca      | Decapoda             | Trapeziidae       | <i>Trapezia</i>           |                     |
| 57    | Animalia | Arthropoda | Malacostraca      | Decapoda             | Varunidae         |                           |                     |
| 58    | Animalia | Arthropoda | Malacostraca      | Decapoda             | Xanthidae         | <i>Atergatis</i>          |                     |
| 59    | Animalia | Arthropoda | Malacostraca      | Decapoda             | Xanthidae         | <i>Chlorodiella</i>       | <i>laevissima</i>   |
| 60    | Animalia | Arthropoda | Malacostraca      | Decapoda             | Xanthidae         | <i>Cyclodius</i>          |                     |
| 61    | Animalia | Arthropoda | Malacostraca      | Decapoda             | Xanthidae         | <i>Etisus</i>             |                     |
| 62    | Animalia | Arthropoda | Malacostraca      | Decapoda             | Xanthidae         | <i>Liocarpilodes</i>      |                     |
| 63    | Animalia | Arthropoda | Malacostraca      | Decapoda             | Xanthidae         | <i>Liomera</i>            |                     |
| 64    | Animalia | Arthropoda | Malacostraca      | Decapoda             | Xanthidae         | <i>Macromedaeus</i>       |                     |
| 65    | Animalia | Arthropoda | Malacostraca      | Decapoda             | Xanthidae         | <i>Paraxanthias</i>       |                     |
| 66    | Animalia | Arthropoda | Malacostraca      | Decapoda             | Xanthidae         | <i>Pilodius</i>           | <i>areolatus</i>    |
| 67    | Animalia | Arthropoda | Malacostraca      | Decapoda             | Xanthidae         | <i>Psaumis</i>            |                     |
| 68    | Animalia | Arthropoda | Malacostraca      | Stomatopoda          | Nannosquillidae   | <i>Pullosquilla</i>       |                     |
| 69    | Animalia | Arthropoda | Maxillopoda       | Calanoida            | Acartiidae        |                           |                     |
| 70    | Animalia | Arthropoda | Maxillopoda       | Cyclopoida           |                   |                           |                     |
| 71    | Animalia | Arthropoda | Maxillopoda       | Harpacticoida        | Ameiridae         |                           |                     |
| 72    | Animalia | Arthropoda | Maxillopoda       | Harpacticoida        | Canuellidae       |                           |                     |
| 73    | Animalia | Arthropoda | Maxillopoda       | Lithoglyptida        | Lithoglyptidae    | <i>Auritoglyptes</i>      |                     |
| 74    | Animalia | Arthropoda | Maxillopoda       | Poecilostomatoida    | Catiniidae        |                           |                     |
| 75    | Animalia | Arthropoda | Maxillopoda       | Poecilostomatoida    | Lichomolgidae     | <i>Lichomoligus</i>       |                     |

|     |          |              |                |                   |                   |                          |                         |
|-----|----------|--------------|----------------|-------------------|-------------------|--------------------------|-------------------------|
| 76  | Animalia | Arthropoda   | Maxillopoda    | Poecilostomatoida | Pseudanthessiidae | <i>Pseudanthessius</i>   |                         |
| 77  | Animalia | Brachiopoda  | Rhynchonellata |                   |                   |                          |                         |
| 78  | Animalia | Bryozoa      | Gymnolaemata   | Cheilostomata     | Beaniidae         |                          |                         |
| 79  | Animalia | Bryozoa      | Gymnolaemata   | Cheilostomata     | Bictectiporidae   |                          |                         |
| 80  | Animalia | Bryozoa      | Gymnolaemata   | Cheilostomata     | Smittinidae       |                          |                         |
| 81  | Animalia | Chaetognatha |                | Biphragmophora    | Spadellidae       | <i>Spadella</i>          |                         |
| 82  | Animalia |              | Actinopterygii | Anguilliformes    | Muraenidae        | <i>Gymnothorax</i>       | <i>pseudothyrsoides</i> |
| 83  | Animalia | Chordata     | Actinopterygii | Atheriniformes    | Atherinidae       | <i>Atherinomorus</i>     |                         |
| 84  | Animalia | Chordata     | Actinopterygii | Atheriniformes    | Atherinidae       | <i>Hypoatherina</i>      |                         |
| 85  | Animalia | Chordata     | Actinopterygii | Beloniformes      | Belonidae         | <i>Strongylura</i>       |                         |
| 86  | Animalia | Chordata     | Actinopterygii | Beloniformes      | Belonidae         | <i>Tylosurus</i>         | <i>gavialoides</i>      |
| 87  | Animalia | Chordata     | Actinopterygii | Beloniformes      | Hemiramphidae     | <i>Hyporhamphus</i>      |                         |
| 88  | Animalia | Chordata     | Actinopterygii | Beryciformes      | Holocentridae     | <i>Sargocentron</i>      | <i>rubrum</i>           |
| 89  | Animalia | Chordata     | Actinopterygii | Cluperiformes     | Clupeidae         | <i>Sardinella</i>        |                         |
| 90  | Animalia | Chordata     | Actinopterygii | Cluperiformes     | Clupeidae         | <i>Spratelloides</i>     |                         |
| 91  | Animalia | Chordata     | Actinopterygii | Cluperiformes     | Engrulidae        | <i>Engraulis</i>         |                         |
| 92  | Animalia | Chordata     | Actinopterygii | Mugiliformes      | Mugilidae         | <i>Mugil</i>             | <i>cephalus</i>         |
| 93  | Animalia | Chordata     | Actinopterygii | Perciformes       | Acanthuridae      | <i>Acanthurus</i>        | <i>trioestegus</i>      |
| 94  | Animalia | Chordata     | Actinopterygii | Perciformes       | Apogonidae        | <i>Apogon</i>            |                         |
| 95  | Animalia | Chordata     | Actinopterygii | Perciformes       | Blenniidae        | <i>Salaria</i>           |                         |
| 96  | Animalia | Chordata     | Actinopterygii | Perciformes       | Carangidae        | <i>Alectis</i>           |                         |
| 97  | Animalia | Chordata     | Actinopterygii | Perciformes       | Carangidae        | <i>Caranx</i>            |                         |
| 98  | Animalia | Chordata     | Actinopterygii | Perciformes       | Carangidae        | <i>Gnathanodon</i>       | <i>speciosus</i>        |
| 99  | Animalia | Chordata     | Actinopterygii | Perciformes       | Carangidae        | <i>Scomberoides</i>      | <i>commersonnianus</i>  |
| 100 | Animalia | Chordata     | Actinopterygii | Perciformes       | Carangidae        | <i>Trachinotus</i>       | <i>blochii</i>          |
| 101 | Animalia | Chordata     | Actinopterygii | Perciformes       | Chaetodontidae    | <i>Chaetodon</i>         |                         |
| 102 | Animalia | Chordata     | Actinopterygii | Perciformes       | Gerreidae         | <i>Gerres</i>            |                         |
| 103 | Animalia | Chordata     | Actinopterygii | Perciformes       | Gobiidae          | <i>Asterropteryx</i>     |                         |
| 104 | Animalia | Chordata     | Actinopterygii | Perciformes       | Gobiidae          | <i>Bathygobius</i>       |                         |
| 105 | Animalia | Chordata     | Actinopterygii | Perciformes       | Gobiidae          | <i>Gnatholepis</i>       |                         |
| 106 | Animalia | Chordata     | Actinopterygii | Perciformes       | Gobiidae          | <i>Gobiodon</i>          | <i>axillaris</i>        |
| 107 | Animalia | Chordata     | Actinopterygii | Perciformes       | Haemulidae        | <i>Plectorhinchus</i>    |                         |
| 108 | Animalia | Chordata     | Actinopterygii | Perciformes       | Kyphosidae        | <i>Kyphosus</i>          | <i>bigibbus</i>         |
| 109 | Animalia | Chordata     | Actinopterygii | Perciformes       | Labridae          | <i>Anampses</i>          |                         |
| 110 | Animalia | Chordata     | Actinopterygii | Perciformes       | Labridae          | <i>Cheilinus</i>         | <i>trilobatus</i>       |
| 111 | Animalia | Chordata     | Actinopterygii | Perciformes       | Labridae          | <i>Cheilio</i>           | <i>inermis</i>          |
| 112 | Animalia | Chordata     | Actinopterygii | Perciformes       | Labridae          | <i>Chlorurus</i>         | <i>sordidus</i>         |
| 113 | Animalia | Chordata     | Actinopterygii | Perciformes       | Labridae          | <i>Coris</i>             | <i>aygula</i>           |
| 114 | Animalia | Chordata     | Actinopterygii | Perciformes       | Labridae          | <i>Cymolutes</i>         |                         |
| 115 | Animalia | Chordata     | Actinopterygii | Perciformes       | Labridae          | <i>Halichoeres</i>       | <i>nebulosus</i>        |
| 116 | Animalia | Chordata     | Actinopterygii | Perciformes       | Labridae          | <i>Hemigymnus</i>        | <i>melapterus</i>       |
| 117 | Animalia | Chordata     | Actinopterygii | Perciformes       | Labridae          | <i>Labrichthys</i>       |                         |
| 118 | Animalia | Chordata     | Actinopterygii | Perciformes       | Labridae          | <i>Labroides</i>         | <i>dimidiatus</i>       |
| 119 | Animalia | Chordata     | Actinopterygii | Perciformes       | Labridae          | <i>Stethojulis</i>       |                         |
| 120 | Animalia | Chordata     | Actinopterygii | Perciformes       | Labridae          | <i>Thalassoma</i>        | <i>lunare</i>           |
| 121 | Animalia | Chordata     | Actinopterygii | Perciformes       | Lethrinidae       | <i>Lethrinus</i>         | <i>nebulosus</i>        |
| 122 | Animalia | Chordata     | Actinopterygii | Perciformes       | Lutjanidae        | <i>Lutjanus</i>          | <i>fulviflamma</i>      |
| 123 | Animalia | Chordata     | Actinopterygii | Perciformes       | Microdesmidae     | <i>Gunnellichthys</i>    |                         |
| 124 | Animalia | Chordata     | Actinopterygii | Perciformes       | Mullidae          | <i>Parupeneus</i>        |                         |
| 125 | Animalia | Chordata     | Actinopterygii | Perciformes       | Pinguipedidae     |                          |                         |
| 126 | Animalia | Chordata     | Actinopterygii | Perciformes       | Pomacentridae     | <i>Abudefduf</i>         | <i>vaigiensis</i>       |
| 127 | Animalia | Chordata     | Actinopterygii | Perciformes       | Pomacentridae     | <i>Cheiloprion</i>       | <i>labiatus</i>         |
| 128 | Animalia | Chordata     | Actinopterygii | Perciformes       | Pomacentridae     | <i>Chromis</i>           | <i>viridis</i>          |
| 129 | Animalia | Chordata     | Actinopterygii | Perciformes       | Pomacentridae     | <i>Dascyllus</i>         | <i>aruanus</i>          |
| 130 | Animalia | Chordata     | Actinopterygii | Perciformes       | Pomacentridae     | <i>Pomacentrus</i>       | <i>coelestis</i>        |
| 131 | Animalia | Chordata     | Actinopterygii | Perciformes       | Pomacentridae     | <i>Pomacentrus</i>       | <i>moluccensis</i>      |
| 132 | Animalia | Chordata     | Actinopterygii | Perciformes       | Pomacentridae     | <i>Stegastes</i>         | <i>nigricans</i>        |
| 133 | Animalia | Chordata     | Actinopterygii | Perciformes       | Priacanthidae     | <i>Heteropriacanthus</i> |                         |
| 134 | Animalia | Chordata     | Actinopterygii | Perciformes       | Pseudochromidae   | <i>Pseudochromis</i>     |                         |
| 135 | Animalia | Chordata     | Actinopterygii | Perciformes       | Labridae          | <i>Hipposcarus</i>       |                         |
| 136 | Animalia | Chordata     | Actinopterygii | Perciformes       | Labridae          | <i>Scarus</i>            | <i>schlegeli</i>        |
| 137 | Animalia | Chordata     | Actinopterygii | Perciformes       | Scatophagidae     | <i>Selenotoca</i>        |                         |
| 138 | Animalia | Chordata     | Actinopterygii | Perciformes       | Serranidae        | <i>Epinephelus</i>       | <i>quoyanus</i>         |
| 139 | Animalia | Chordata     | Actinopterygii | Perciformes       | Siganidae         | <i>Siganus</i>           |                         |
| 140 | Animalia | Chordata     | Actinopterygii | Perciformes       | Sillaginidae      | <i>Sillago</i>           |                         |
| 141 | Animalia | Chordata     | Actinopterygii | Perciformes       | Sphyraenidae      | <i>Sphyraena</i>         |                         |
| 142 | Animalia | Chordata     | Actinopterygii | Scorpaeniformes   | Sebastidae        |                          |                         |
| 143 | Animalia | Chordata     | Actinopterygii | Siluriformes      |                   |                          |                         |
| 144 | Animalia | Chordata     | Actinopterygii | Syngnathiformes   | Fistularidae      | <i>Fistularia</i>        |                         |
| 145 | Animalia | Chordata     | Actinopterygii | Tetraodontiformes | Balistidae        | <i>Rhinecanthus</i>      | <i>aculeatus</i>        |
| 146 | Animalia | Chordata     | Actinopterygii | Tetraodontiformes | Diodontidae       | <i>Diodon</i>            | <i>hystrix</i>          |
| 147 | Animalia | Chordata     | Actinopterygii | Tetraodontiformes | Monacanthidae     | <i>Pervagor</i>          |                         |
| 148 | Animalia | Chordata     | Actinopterygii | Tetraodontiformes | Ostraciidae       | <i>Ostracion</i>         | <i>cubicus</i>          |
| 149 | Animalia | Chordata     | Actinopterygii | Tetraodontiformes | Tetraodontidae    | <i>Arothron</i>          | <i>hispidus</i>         |
| 150 | Animalia | Chordata     | Ascidiaceae    | Enterogona        | Asciidiidae       |                          |                         |
| 151 | Animalia | Chordata     | Ascidiaceae    | Pleurogona        | Stylelidae        | <i>Botryllus</i>         |                         |
| 152 | Animalia | Chordata     | Ascidiaceae    | Stolidobranchia   | Pyuridae          | <i>Pyura</i>             |                         |

|     |          |                 |                  |                   |                  |                             |                       |
|-----|----------|-----------------|------------------|-------------------|------------------|-----------------------------|-----------------------|
| 153 | Animalia | Chordata        | Chondrichthyes   | Myliobatiformes   | Dasyatidae       | <i>Himantura</i>            | <i>leoparda</i>       |
| 154 | Animalia | Chordata        | Chondrichthyes   | Myliobatiformes   | Dasyatidae       | <i>Neotrygon</i>            | <i>ningalooensis</i>  |
| 155 | Animalia | Chordata        | Chondrichthyes   | Myliobatiformes   | Dasyatidae       | <i>Pastinachus</i>          | <i>atrus</i>          |
| 156 | Animalia | Chordata        | Chondrichthyes   | Myliobatiformes   | Dasyatidae       | <i>Taeniura</i>             |                       |
| 157 | Animalia | Chordata        | Chondrichthyes   | Myliobatiformes   | Myliobatidae     | <i>Aetobatus</i>            |                       |
|     | Animalia | Chordata        | Mammalia         | Artiodactyla      | Bovidae          | <i>Bos</i>                  |                       |
|     | Animalia | Chordata        | Mammalia         | Artiodactyla      | Suidae           | <i>Sus</i>                  | <i>scrofa</i>         |
| 158 | Animalia | Chordata        | Mammalia         | Cetacea           | Delphinidae      |                             |                       |
|     | Animalia | Chordata        | Mammalia         | Primates          | Hominidae        | <i>Homo</i>                 | <i>sapiens</i>        |
| 159 | Animalia | Chordata        | Ophiuroidea      | Ophiurida         |                  |                             |                       |
| 160 | Animalia | Cnidaria        | Anthozoa         | Actinaria         |                  |                             |                       |
| 161 | Animalia | Cnidaria        | Anthozoa         | Alcyonacea        | Alcyoniidae      |                             |                       |
| 162 | Animalia | Cnidaria        | Anthozoa         | Scleractinia      | Acroporidae      | <i>Montipora</i>            |                       |
| 163 | Animalia | Cnidaria        | Anthozoa         | Scleractinia      | Pocilloporidae   | <i>Pocillopora</i>          |                       |
| 164 | Animalia | Cnidaria        | Hydrozoa         | Leptothecata      | Campanulariidae  | <i>Campanularia</i>         |                       |
| 165 | Animalia | Cnidaria        | Hydrozoa         | Leptothecata      | Campanulariidae  | <i>Clytia</i>               |                       |
| 166 | Animalia | Cnidaria        | Hydrozoa         | Leptothecata      | Haleciidae       | <i>Halecium</i>             |                       |
| 167 | Animalia | Cnidaria        | Hydrozoa         | Leptothecata      | Mitrocomidae     | <i>Mitrocomella</i>         |                       |
| 168 | Animalia | Cnidaria        | Hydrozoa         | Leptothecata      | Plumulariidae    | <i>Plumularia</i>           |                       |
| 169 | Animalia | Cnidaria        | Hydrozoa         | Leptothecata      | Sertulariidae    |                             |                       |
| 170 | Animalia | Cnidaria        | Bivalvulida      | Myxidiadae        |                  |                             |                       |
| 171 | Animalia | Ctenophora      | Tentaculata      | Platyctenida      | Coeloplanidae    | <i>Vallicula</i>            |                       |
| 172 | Animalia | Echinodermata   | Echinoidea       |                   |                  |                             |                       |
| 173 | Animalia | Echinodermata   | Holothuroidea    | Aspidochirotida   | Holothuridae     | <i>Holothuria</i>           | <i>atra</i>           |
| 174 | Animalia | Echinodermata   | Ophiuroidea      | Ophiurida         | Amphiuridae      | <i>Amphipholis</i>          |                       |
| 175 | Animalia | Echinodermata   | Ophiuroidea      | Ophiurida         | Ophiocomidae     | <i>Ophiocoma</i>            |                       |
| 176 | Animalia | Echinodermata   | Ophiuroidea      | Ophiurida         | Ophiothrichidae  | <i>Macrophiothrix</i>       | <i>caenosa</i>        |
| 177 | Animalia | Gastrotricha    |                  | Chaetonotida      | Chaetonotidae    |                             |                       |
| 178 | Animalia | Mollusca        | Bivalvia         | Limoida           | Limidae          | <i>Limaria</i>              |                       |
| 179 | Animalia | Mollusca        | Bivalvia         | Lucinoida         | Lucinidae        |                             |                       |
| 180 | Animalia | Mollusca        | Bivalvia         | Mytiloida         | Mytilidae        |                             |                       |
| 181 | Animalia | Mollusca        | Bivalvia         | Ostreoida         | Ostreidae        | <i>Lopha</i>                |                       |
| 182 | Animalia | Mollusca        | Bivalvia         | Pterioidea        | Isognomonidae    | <i>Isognomon</i>            |                       |
| 183 | Animalia | Mollusca        | Bivalvia         | Solemyida         | Solemyidae       | <i>Solemya</i>              |                       |
| 184 | Animalia | Mollusca        | Bivalvia         | Veneroida         | Cardiidae        | <i>Fragum</i>               |                       |
| 185 | Animalia | Mollusca        | Bivalvia         | Veneroida         | Lucinidae        |                             |                       |
| 186 | Animalia | Mollusca        | Bivalvia         | Veneroida         | Petricolidae     |                             |                       |
| 187 | Animalia | Mollusca        | Cephalopoda      | Octopoda          | Octopodidae      | <i>Abdopus</i>              |                       |
| 188 | Animalia | Mollusca        | Cephalopoda      | Octopoda          | Octopodidae      | <i>Octopus</i>              | <i>cyanea</i>         |
| 189 | Animalia | Mollusca        | Cephalopoda      | Octopoda          | Octopodidae      | <i>Octopus</i>              |                       |
| 190 | Animalia | Mollusca        | Cephalopoda      | Teuthida          | Loliginidae      | <i>Sepioteuthis</i>         |                       |
| 191 | Animalia | Mollusca        | Gastropoda       | Caenogastropoda   | Cerithiidae      | <i>Cerithium</i>            | <i>atromarginatum</i> |
| 192 | Animalia | Mollusca        | Gastropoda       | Caenogastropoda   | Cerithiidae      | <i>Cerithium</i>            | <i>rostratum</i>      |
| 193 | Animalia | Mollusca        | Gastropoda       | Caenogastropoda   | Cerithiidae      | <i>Clypeomorus</i>          |                       |
| 194 | Animalia | Mollusca        | Gastropoda       | Caenogastropoda   | Litiopidae       | <i>Alaba</i>                |                       |
| 195 | Animalia | Mollusca        | Gastropoda       | Caenogastropoda   | Turritellidae    |                             |                       |
| 196 | Animalia | Mollusca        | Gastropoda       | Cerithimorpha     | Cerithidae       | <i>Cerithium</i>            |                       |
| 197 | Animalia | Mollusca        | Gastropoda       | Hypsogastropoda   | Strombidae       | <i>Strombus</i>             |                       |
| 198 | Animalia | Mollusca        | Gastropoda       | Nudipleura        |                  |                             |                       |
| 199 | Animalia | Mollusca        | Gastropoda       | Vetigastropoda    | Haliotidae       | <i>Haliotis</i>             | <i>asinina</i>        |
| 200 | Animalia | Mollusca        | Gastropoda       | Vetigastropoda    | Trochidae        | <i>Pseudostomatella</i>     |                       |
| 201 | Animalia | Mollusca        | Gastropoda       | Vetigastropoda    | Trochidae        | <i>Rossiteria</i>           |                       |
| 202 | Animalia | Mollusca        | Gastropoda       | Vetigastropoda    | Trochidae        | <i>Stomatella</i>           | <i>impertusa</i>      |
| 203 | Animalia | Mollusca        | Gastropoda       | Vetigastropoda    | Trochidae        | <i>Stomatia</i>             |                       |
| 204 | Animalia | Mollusca        | Gastropoda       | Vetigastropoda    | Turbinidae       | <i>Turbo (Marmarostoma)</i> |                       |
| 205 | Animalia | Mollusca        | Gastropoda       |                   | Littorinidae     | <i>Echinolittorina</i>      |                       |
| 206 | Animalia | Mollusca        | Gastropoda       |                   | Strombidae       | <i>Lambis</i>               |                       |
| 207 | Animalia | Mollusca        | Polyplacophora   | Neoloricata       | Mopaliidae       |                             |                       |
| 208 | Animalia | Nematoda        | Chromadorea      | Chromadorida      | Chromadoridae    |                             |                       |
| 209 | Animalia | Nemertea        | Enopla           | Monostilifera     | Tetrastemmatidae | <i>Tetrastemma</i>          |                       |
| 210 | Animalia | Nemertea        | Palaeonemertea   |                   | Cephalothricidae | <i>Cephalothrix</i>         |                       |
| 211 | Animalia | Platyhelminthes | Monogenea        |                   |                  |                             |                       |
| 212 | Animalia | Platyhelminthes | Rhabditophora    | Polycladida       |                  |                             |                       |
| 213 | Animalia | Platyhelminthes | Trematoda        |                   |                  |                             |                       |
| 214 | Animalia | Platyhelminthes | Turbellaria      | Macrostomida      | Macrostomidae    |                             |                       |
| 215 | Animalia | Platyhelminthes | Turbellaria      | Macrostomida      | Microstomidae    |                             |                       |
| 216 | Animalia | Platyhelminthes | Turbellaria      | Rhabdocoela       |                  |                             |                       |
| 217 | Animalia | Porifera        | Calcarea         |                   |                  |                             |                       |
| 218 | Animalia | Porifera        | Demospongiae     | Dictyoceratida    |                  |                             |                       |
| 219 | Animalia | Porifera        | Demospongiae     | Hadromerida       | Clionidae        | <i>Pione</i>                |                       |
| 220 | Animalia | Porifera        | Demospongiae     | Halichondrida     | Halichondriidae  | <i>Halichondria</i>         |                       |
| 221 | Animalia | Porifera        | Demospongiae     | Halichondrida     | Halichondriidae  | <i>Hymeniacion</i>          |                       |
| 222 | Animalia | Porifera        | Demospongiae     | Haplosclerida     |                  |                             |                       |
| 223 | Animalia | Porifera        | Demospongiae     | Poecilosclerida   | Desmacellidae    | <i>Biemna</i>               |                       |
| 224 | Animalia | Porifera        | Demospongiae     | Poecilosclerida   | Microcionidae    | <i>Clathria</i>             |                       |
| 225 | Animalia | Porifera        | Homoscleromorpha | Homosclerophorida | Plakinidae       |                             |                       |
| 226 | Animalia | Porifera        |                  | Homosclerophorida | Oscarellidae     | <i>Oscarella</i>            |                       |

|     |           |                 |                     |                     |                      |                            |                      |
|-----|-----------|-----------------|---------------------|---------------------|----------------------|----------------------------|----------------------|
| 227 | Animalia  | Xenacoelomorpha | Acoela              |                     | Isodiametridae       |                            |                      |
| 228 | Chromista | Bigyra          | Labyrinthulomycetes | Labyrinthulomycetes | Thraustochytriaceae  | <i>Aplanochytrium</i>      |                      |
| 229 | Chromista | Bigyra          |                     | Bicosoecida         | Bicosoecidae         | <i>Bicosoeca</i>           |                      |
| 230 | Chromista | Bigyra          |                     | Bicosoecida         |                      | <i>Ceacitellus</i>         |                      |
| 231 | Chromista | Cercozoa        | Chlorarachnea       | Chlorarchniida      | Chlorarachniaceae    | <i>Bigelowiella</i>        |                      |
| 232 | Chromista | Cercozoa        | Imbricatea          | Thaumatomadida      | Thaumatomastigidae   |                            |                      |
| 233 | Chromista | Cercozoa        | Sarcomonadea        | Sarcomonadida       | Cercomonadidae       | <i>Massisteria</i>         |                      |
| 234 | Chromista | Cercozoa        | Thecofilosea        | Cryomonadida        |                      | <i>Cryothecomonas</i>      |                      |
| 235 | Chromista | Cercozoa        |                     |                     |                      | <i>Minorisa</i>            |                      |
| 236 | Chromista | Ciliophora      | Heterotrichea       | Heterotrichida      | Condylostomatidae    | <i>Condylostoma</i>        |                      |
| 237 | Chromista | Ciliophora      | Litostomatea        | Haptorida           | Lacrymariidae        | <i>Lacrymaria</i>          |                      |
| 238 | Chromista | Ciliophora      | Litostomatea        | Pleurostomatida     | Litonotidae          | <i>Litonotus</i>           |                      |
| 239 | Chromista | Ciliophora      | Nassophorea         | Synhymeniida        | Orthodonellidae      | <i>Zosterodasys</i>        |                      |
| 240 | Chromista | Ciliophora      | Oligohymenophorea   | Hymenostomatida     |                      |                            |                      |
| 241 | Chromista | Ciliophora      | Oligohymenophorea   | Peniculida          |                      |                            |                      |
| 242 | Chromista | Ciliophora      | Oligohymenophorea   | Philasterida        | Cinetochilidae       | <i>Cinetochilum</i>        |                      |
| 243 | Chromista | Ciliophora      | Oligohymenophorea   | Philasterida        | Cohnilembidae        | <i>Cohnilembus</i>         |                      |
| 244 | Chromista | Ciliophora      | Oligohymenophorea   | Philasterida        | Cohnilembidae        | <i>Porpostoma</i>          |                      |
| 245 | Chromista | Ciliophora      | Oligohymenophorea   | Oligohymenophorea   | Loxocephalidae       | <i>Cardiostomatella</i>    |                      |
| 246 | Chromista | Ciliophora      | Oligohymenophorea   | Philasterida        | Orchitophryidae      | <i>Metanophrys</i>         |                      |
| 247 | Chromista | Ciliophora      | Oligohymenophorea   | Philasterida        | Orchitophryidae      | <i>Paranophrys</i>         |                      |
| 248 | Chromista | Ciliophora      | Oligohymenophorea   | Philasterida        | Philasteridae        |                            |                      |
| 249 | Chromista | Ciliophora      | Oligohymenophorea   | Philasterida        | Uronematidae         | <i>Uronema</i>             | <i>heteromarinum</i> |
| 250 | Chromista | Ciliophora      | Oligohymenophorea   | Philasterida        | Uronematidae         | <i>Uronemella</i>          |                      |
| 251 | Chromista | Ciliophora      | Oligohymenophorea   | Pleuronematida      | Cyclidiidae          | <i>Cyclidium</i>           |                      |
| 252 | Chromista | Ciliophora      | Oligohymenophorea   | Pleuronematida      | Pleurodematidae      | <i>Pleuronema</i>          | <i>coronatum</i>     |
| 253 | Chromista | Ciliophora      | Phyllopharyngea     | Dysteriida          | Dysteriidae          | <i>Dysteria</i>            |                      |
| 254 | Chromista | Ciliophora      | Prostomatea         | Prorodontida        | Colepidae            | <i>Tiarina</i>             |                      |
| 255 | Chromista | Ciliophora      | Prostomatea         | Prorodontida        | Urotrichidae         | <i>Urotricha</i>           |                      |
| 256 | Chromista | Ciliophora      | Spirotrichea        | Choreotrichida      | Strobiliidiidae      | <i>Pelagostrobilidium</i>  |                      |
| 257 | Chromista | Ciliophora      | Spirotrichea        | Choreotrichida      | Strobiliidiidae      | <i>Rimostrombidium</i>     |                      |
| 258 | Chromista | Ciliophora      | Spirotrichea        | Choreotrichida      | Strombidinopsidae    | <i>Parastrombidinopsis</i> |                      |
| 259 | Chromista | Ciliophora      | Spirotrichea        | Choreotrichida      | Strombidinopsidae    | <i>Strombidinopsis</i>     |                      |
| 260 | Chromista | Ciliophora      | Spirotrichea        | Euplotida           | Oronchiidae          | <i>Diophrys</i>            |                      |
| 261 | Chromista | Ciliophora      | Spirotrichea        | Sporadotrichida     | Oxytrichidae         | <i>Hemigastrostyla</i>     |                      |
| 262 | Chromista | Ciliophora      | Spirotrichea        | Tintinnida          | Tintinnidae          |                            |                      |
| 263 | Chromista | Ciliophora      | Spirotrichea        | Urostyliida         | Holostichidae        | <i>Holosticha</i>          | <i>diademata</i>     |
| 264 | Chromista | Ciliophora      | Spirotrichea        |                     | Cyrtostrombidiidae   | <i>Cyrtostrombidium</i>    |                      |
| 265 | Chromista | Ciliophora      | Spirotrichea        |                     | Strombidiidae        | <i>Strombidium</i>         |                      |
| 266 | Chromista | Ciliophora      | Spirotrichea        |                     | Totoniidae           | <i>Pseudotontonia</i>      |                      |
| 267 | Chromista | Ciliophora      | Spirotrichea        |                     |                      | <i>Protocruzia</i>         |                      |
| 268 | Chromista | Cryptophyta     | Cryptophyceae       | Cryptomonadales     | Cryptomonadaceae     |                            |                      |
| 269 | Chromista | Cryptophyta     | Cryptophyceae       | Cryptomonadales     | Goniomonadaceae      | <i>Goniomonas</i>          |                      |
| 270 | Chromista | Cryptophyta     | Cryptophyceae       | Cryptomonadales     | Hemiselmidae         | <i>Hemiselmis</i>          |                      |
| 271 | Chromista | Cryptophyta     | Cryptophyceae       | Pyrenomonadales     | Geminigeraceae       | <i>Proteomonas</i>         |                      |
| 272 | Chromista | Cryptophyta     | Cryptophyceae       | Pyrenomonadales     | Geminigeraceae       | <i>Teleaulax</i>           |                      |
| 273 | Chromista | Cryptophyta     | Cryptophyceae       | Pyrenomonadales     | Pyrenomonadaceae     | <i>Rhodomonas</i>          |                      |
| 274 | Chromista | Cryptophyta     | Katablepharidophyta |                     | Katablepharidaceae   |                            |                      |
| 275 | Chromista | Cryptophyta     | Telonemea           | Telonemida          |                      | <i>Telonema</i>            |                      |
| 276 | Chromista | Haptophyta      | Chrysophyceae       | Chromulinales       | Chromulinaceae       |                            |                      |
| 277 | Chromista | Haptophyta      | Coccolithophyceae   | Phaeocystales       | Phaeocystaceae       | <i>Phaeocystis</i>         |                      |
| 278 | Chromista | Haptophyta      | Coccolithophyceae   | Prymnesiales        | Chrysochromulinaceae | <i>Chrysochromulina</i>    |                      |
| 279 | Chromista | Haptophyta      | Pavlovophycidae     | Pavlovales          | Pavlovaceae          | <i>Pavlova</i>             | <i>pinguis</i>       |
| 280 | Chromista | Haptophyta      | Prymnesiophyceae    | Isochrysidales      | Noelaerhabdaceae     | <i>Emiliana</i>            |                      |
| 281 | Chromista | Heliozoa        | Centrohelea         | Centrohelida        | Acanthocystidae      | <i>Raineriophrys</i>       |                      |
| 282 | Chromista | Myxozoa         | Dinophyceae         | Gonyaulacales       | Amphidomataceae      | <i>Amphidoma</i>           |                      |
| 283 | Chromista | Myxozoa         | Dinophyceae         | Gonyaulacales       | Amphidomataceae      | <i>Azadinium</i>           |                      |
| 284 | Chromista | Myxozoa         | Dinophyceae         | Gonyaulacales       | Ceratiaceae          | <i>Neoceratium</i>         |                      |
| 285 | Chromista | Myxozoa         | Dinophyceae         | Gonyaulacales       | Gonyaulacaceae       | <i>Alexandrium</i>         |                      |
| 286 | Chromista | Myxozoa         | Dinophyceae         | Gonyaulacales       | Gonyaulacaceae       | <i>Gonyaulax</i>           |                      |
| 287 | Chromista | Myxozoa         | Dinophyceae         | Gymnodiniales       | Brachidiniaceae      | <i>Brachidinium</i>        |                      |
| 288 | Chromista | Myxozoa         | Dinophyceae         | Gymnodiniales       | Gymnodiniaceae       | <i>Amphidinium</i>         | <i>klebsii</i>       |
| 289 | Chromista | Myxozoa         | Dinophyceae         | Gymnodiniales       | Gymnodiniaceae       | <i>Cochlodinium</i>        |                      |
| 290 | Chromista | Myxozoa         | Dinophyceae         | Gymnodiniales       | Gymnodiniaceae       | <i>Gymnodinium</i>         |                      |
| 291 | Chromista | Myxozoa         | Dinophyceae         | Gymnodiniales       | Gymnodiniaceae       | <i>Gyrodinium</i>          |                      |
| 292 | Chromista | Myxozoa         | Dinophyceae         | Gymnodiniales       | Gymnodiniaceae       | <i>Lepidodinium</i>        |                      |
| 293 | Chromista | Myxozoa         | Dinophyceae         | Gymnodiniales       | Gymnodiniaceae       | <i>Paragymnodinium</i>     |                      |
| 294 | Chromista | Myxozoa         | Dinophyceae         | Gymnodiniales       | Karenaceae           | <i>Karenia</i>             |                      |
| 295 | Chromista | Myxozoa         | Dinophyceae         | Gymnodiniales       | Karenaceae           | <i>Karlodinium</i>         |                      |
| 296 | Chromista | Myxozoa         | Dinophyceae         | Gymnodiniales       | Warnowiaceae         | <i>Warnowia</i>            |                      |
| 297 | Chromista | Myxozoa         | Dinophyceae         | Lophodiniiales      | Lophodiniaceae       | <i>Woloszynskia</i>        |                      |
| 298 | Chromista | Myxozoa         | Dinophyceae         | Peridinales         | Glenodiniaceae       | <i>Glenodinium</i>         |                      |
| 299 | Chromista | Myxozoa         | Dinophyceae         | Peridinales         | Heterocapsaceae      | <i>Heterocapsa</i>         |                      |
| 300 | Chromista | Myxozoa         | Dinophyceae         | Peridinales         | Peridiniaceae        | <i>Pentapharsodinium</i>   |                      |
| 301 | Chromista | Myxozoa         | Dinophyceae         | Peridinales         | Peridiniaceae        | <i>Peridinium</i>          |                      |
| 302 | Chromista | Myxozoa         | Dinophyceae         | Peridinales         | Pfiesteriaceae       |                            |                      |
| 303 | Chromista | Myxozoa         | Dinophyceae         | Peridinales         | Podolampaceae        | <i>Blepharocysta</i>       |                      |

|     |           |                     |                     |                    |                     |                         |                    |
|-----|-----------|---------------------|---------------------|--------------------|---------------------|-------------------------|--------------------|
| 304 | Chromista | Myzozoa             | Dinophyceae         | Peridinales        | Podolampaceae       | <i>Podolampas</i>       |                    |
| 305 | Chromista | Myzozoa             | Dinophyceae         | Peridinales        | Protoperidiniaceae  | <i>Protoperidinium</i>  |                    |
| 306 | Chromista | Myzozoa             | Dinophyceae         | Peridinales        | Thoracosphaeraeae   | <i>Scrippsiella</i>     |                    |
| 307 | Chromista | Myzozoa             | Dinophyceae         | Peridinales        |                     | <i>Galeidinium</i>      |                    |
| 308 | Chromista | Myzozoa             | Dinophyceae         | Prorocentrales     | Prorocentraceae     | <i>Exuviaella</i>       |                    |
| 309 | Chromista | Myzozoa             | Dinophyceae         | Prorocentrales     | Prorocentraceae     | <i>Prorocentrum</i>     |                    |
| 310 | Chromista | Myzozoa             | Dinophyceae         | Pyrocystales       | Pyrocystaceae       | <i>Dissodinium</i>      |                    |
| 311 | Chromista | Myzozoa             | Dinophyceae         | Suessiales         | Symbiodiniaceae     | <i>Symbiodinium</i>     | clade A            |
| 312 | Chromista | Myzozoa             | Dinophyceae         | Suessiales         | Symbiodiniaceae     | <i>Symbiodinium</i>     | clade B            |
| 313 | Chromista | Myzozoa             | Dinophyceae         | Suessiales         | Symbiodiniaceae     | <i>Symbiodinium</i>     | clade C            |
| 314 | Chromista | Myzozoa             | Dinophyceae         | Suessiales         | Symbiodiniaceae     | <i>Symbiodinium</i>     | clade D            |
| 315 | Chromista | Myzozoa             | Dinophyceae         | Suessiales         | Symbiodiniaceae     | <i>Symbiodinium</i>     | clade F            |
| 316 | Chromista | Myzozoa             | Dinophyceae         | Suessiales         | Symbiodiniaceae     | <i>Symbiodinium</i>     | clade G            |
| 317 | Chromista | Myzozoa             | Dinophyceae         | Suessiales         | Symbiodiniaceae     | <i>Symbiodinium</i>     | clade H            |
| 318 | Chromista | Myzozoa             | Dinophyceae         | Syndiniales        | Amoebophryaceae     | <i>Amoebophrya</i>      |                    |
| 319 | Chromista | Myzozoa             | Dinophyceae         | Syndiniales        | Duboscquellidae     | <i>Duboscquella</i>     |                    |
| 320 | Chromista | Myzozoa             | Dinophyceae         | Syndiniales        | Syndiniaceae        | <i>Hematodinium</i>     | <i>perezi</i>      |
| 321 | Chromista | Myzozoa             | Dinophyceae         |                    |                     | <i>Stoeceria</i>        |                    |
| 322 | Chromista | Myzozoa             | Gregarinasina       | Eugregarinorida    | Gregarinidae        |                         |                    |
| 323 | Chromista | Myzozoa             | Gregarinasina       | Eugregarinorida    | Lecudinidae         | <i>Lankesteria</i>      |                    |
| 324 | Chromista | Myzozoa             | Gregarinasina       | Eugregarinorida    | Lecudinidae         | <i>Lecudina</i>         |                    |
| 325 | Chromista | Myzozoa             | Perkinsea           | Perkinsida         | Perkinsidae         | <i>Perkinsus</i>        |                    |
| 326 | Chromista | Ochrophyta          | Bacillariophyceae   | Achnanthes         |                     |                         |                    |
| 327 | Chromista | Ochrophyta          | Bacillariophyceae   | Bacillariales      | Bacillariaceae      | <i>Cylindrotheca</i>    |                    |
| 328 | Chromista | Ochrophyta          | Bacillariophyceae   | Bacillariales      | Bacillariaceae      | <i>Nitzschia</i>        |                    |
| 329 | Chromista | Ochrophyta          | Bacillariophyceae   | Bacillariales      | Bacillariaceae      | <i>Pseudo-nitzschia</i> |                    |
| 330 | Chromista | Ochrophyta          | Bacillariophyceae   | Naviculales        | Naviculaceae        | <i>Meuniera</i>         |                    |
| 331 | Chromista | Ochrophyta          | Bacillariophyceae   | Naviculales        | Naviculaceae        | <i>Navicula</i>         |                    |
| 332 | Chromista | Ochrophyta          | Bacillariophyceae   | Naviculales        | Pleurosigmataceae   |                         |                    |
| 333 | Chromista | Ochrophyta          | Bacillariophyceae   | Thalassiosiphales  | Catenulaceae        | <i>Amphora</i>          |                    |
| 334 | Chromista | Ochrophyta          | Chrysophyceae       | Chromulinales      | Paraphysomonadaceae | <i>Paraphysomonas</i>   |                    |
| 335 | Chromista | Ochrophyta          | Coccolodiscophyceae | Chaetocerotales    | Chaetocerotaceae    | <i>Chaetoceros</i>      |                    |
| 336 | Chromista | Ochrophyta          | Coccolodiscophyceae | Corethrales        | Corethraceae        | <i>Corethron</i>        |                    |
| 337 | Chromista | Ochrophyta          | Coccolodiscophyceae | Coccolodiscals     | Hemidiscaceae       | <i>Actinocyclus</i>     |                    |
| 338 | Chromista | Ochrophyta          | Coccolodiscophyceae | Leptocylindrales   | Leptocylindraceae   |                         |                    |
| 339 | Chromista | Ochrophyta          | Coccolodiscophyceae | Rhizoleniales      | Rhizoleniaceae      | <i>Guinardia</i>        |                    |
| 340 | Chromista | Ochrophyta          | Coccolodiscophyceae | Rhizoleniales      | Rhizoleniaceae      | <i>Rhizosolenia</i>     |                    |
| 341 | Chromista | Ochrophyta          | Coccolodiscophyceae | Thalassiosirales   | Skeletonemataceae   | <i>Skeletonema</i>      | <i>menzellii</i>   |
| 342 | Chromista | Ochrophyta          | Coccolodiscophyceae | Thalassiosirales   | Thalassiosiraceae   | <i>Minidiscus</i>       |                    |
| 343 | Chromista | Ochrophyta          | Coccolodiscophyceae | Thalassiosirales   | Thalassiosiraceae   | <i>Thalassiosira</i>    |                    |
| 344 | Chromista | Ochrophyta          | Dictyochophyceae    | Florentiellales    |                     | <i>Florentiella</i>     |                    |
| 345 | Chromista | Ochrophyta          | Dictyochophyceae    | Pedinellales       |                     | <i>Pseudopedinella</i>  |                    |
| 346 | Chromista | Ochrophyta          | Dictyochophyceae    | Rhizochromulinales |                     | <i>Rhizochromulina</i>  |                    |
| 347 | Chromista | Ochrophyta          | Fragilariophyceae   | Fragilariales      | Fragilariaceae      | <i>Opephora</i>         |                    |
| 348 | Chromista | Ochrophyta          | Fragilariophyceae   | Rhaphoneidales     | Rhaphoneidaceae     |                         |                    |
| 349 | Chromista | Ochrophyta          | Fragilariophyceae   | Striatellales      |                     | <i>Florella</i>         |                    |
| 350 | Chromista | Ochrophyta          | Fragilariophyceae   | Thalassionematales | Thalassionemataceae | <i>Thalassionema</i>    |                    |
| 351 | Chromista | Ochrophyta          | Fragilariophyceae   |                    | Licmophoraceae      | <i>Licmosphenia</i>     |                    |
| 352 | Chromista | Ochrophyta          | Mediophyceae        | Cymatosirales      | Cymatosiraceae      | <i>Minutocellus</i>     |                    |
| 353 | Chromista | Ochrophyta          | Mediophyceae        | Hemiaulales        | Hemiaulaceae        | <i>Cerataulina</i>      |                    |
| 354 | Chromista | Ochrophyta          | Mediophyceae        | Thalassiosirales   | Stephanodiscaceae   | <i>Cyclotella</i>       |                    |
| 355 | Chromista | Ochrophyta          | Pelagophyceae       | Pelagomonadales    |                     | <i>Pelagomonas</i>      |                    |
| 356 | Chromista | Ochrophyta          | Pelagophyceae       | Sarcinochrysidales |                     |                         |                    |
| 357 | Chromista | Ochrophyta          | Phaeophyceae        | Dictyotales        | Dictyotaceae        | <i>Lobophora</i>        |                    |
| 358 | Chromista | Ochrophyta          | Phaeophyceae        | Fucales            | Sargassaceae        | <i>Sargassum</i>        | <i>ilicifolium</i> |
| 359 | Chromista | Ochrophyta          | Raphidophyceae      |                    |                     | <i>Psammomonas</i>      |                    |
| 360 | Chromista | Ochrophyta          |                     | Dictyotales        | Dictyotaceae        | <i>Dictyota</i>         |                    |
| 361 | Chromista | Ochrophyta          |                     | Dictyotales        | Dictyotaceae        | <i>Lobophora</i>        |                    |
| 362 | Chromista | Ochrophyta          |                     | Ectocarpales       | Chordariaceae       |                         |                    |
| 363 | Chromista | Ochrophyta          |                     | Ectocarpales       | Scytosiphonaceae    | <i>Hydroclathrus</i>    |                    |
| 364 | Chromista | Ochrophyta          |                     | Fucales            | Sargassaceae        |                         |                    |
| 365 | Chromista | Ochrophyta          |                     | Pinguiochrysidales | Pinguiochrysidaceae | <i>Pinguiochrysis</i>   |                    |
| 366 | Chromista | Ochrophyta          |                     | Sphacelariales     | Sphacelariaceae     |                         |                    |
| 367 | Chromista | Oomycota            | Oomycetes           | Lagenidiales       | Haliphthoraceae     |                         |                    |
| 368 | Chromista | Oomycota            | Oomycetes           | Myzocytiosporales  | Eurychasmataceae    |                         |                    |
| 369 | Chromista | Oomycota            | Oomycetes           | Olpidiosporales    |                     |                         |                    |
| 370 | Chromista | Radiozoa            | Acantharea          | Arthracanthida     |                     |                         |                    |
| 371 | Chromista | Radiozoa            | Polycystinea        | Spumellaria        | Litheliidae         | <i>Larcopyle</i>        |                    |
| 372 | Chromista |                     |                     |                    |                     | <i>Chromerida</i>       |                    |
| 373 | Fungi     | Ascomycota          | Dothideomycetes     | Capnodiales        | Cladosporiaceae     | <i>Cladosporium</i>     |                    |
| 374 | Fungi     | Ascomycota          | Dothideomycetes     | Pleosporales       | Pleosporaceae       |                         |                    |
| 375 | Fungi     | Ascomycota          | Eurotiomycetes      | Eurotiales         | Trichocomaceae      | <i>Talaromyces</i>      |                    |
| 376 | Fungi     | Ascomycota          | Saccharomycetes     | Saccharomycetales  |                     |                         |                    |
| 377 | Fungi     | Basidiomycota       | Agaricomycetes      | Agaricales         |                     |                         |                    |
| 378 | Fungi     | Basidiomycota       | Malasseziomycetes   | Malasseziales      | Malasseziaceae      | <i>Malassezia</i>       |                    |
| 379 | Fungi     | Chytridiomycota     | Chytridiomycetes    | Chytridiales       | Chytridiaceae       | <i>Chytridium</i>       |                    |
| 380 | Fungi     | Entomophthoromycota | Basidiobolomycetes  | Basidiobales       | Basidiobolaceae     | <i>Basidiobolus</i>     |                    |

|     |          |              |                      |                       |                        |                           |
|-----|----------|--------------|----------------------|-----------------------|------------------------|---------------------------|
| 381 | Plantae  | Chlorophyta  | Chlorodendrophyceae  | Chlorodendrales       | Chlorodendraceae       | <i>Tetraselmis</i>        |
| 382 | Plantae  | Chlorophyta  | Chlorophyceae        | Chlamydomonadales     |                        |                           |
| 383 | Plantae  | Chlorophyta  | Mamiellophyceae      | Dolichomastigaceae    | Crustomastigaceae      |                           |
| 384 | Plantae  | Chlorophyta  | Mamiellophyceae      | Dolichomastigaceae    | Dolichomastigaceae     |                           |
| 385 | Plantae  | Chlorophyta  | Mamiellophyceae      | Mamiellales           | Bathycoccaceae         | <i>Bathycoccus</i>        |
| 386 | Plantae  | Chlorophyta  | Mamiellophyceae      | Mamiellales           | Bathycoccaceae         | <i>Ostreococcus</i>       |
| 387 | Plantae  | Chlorophyta  | Mamiellophyceae      | Mamiellales           | Mamiellaceae           | <i>Mamiella</i>           |
| 388 | Plantae  | Chlorophyta  | Mamiellophyceae      | Mamiellales           | Mamiellaceae           | <i>Mantoniella</i>        |
| 389 | Plantae  | Chlorophyta  | Mamiellophyceae      | Mamiellales           | Mamiellaceae           | <i>Micromonas</i>         |
| 390 | Plantae  | Chlorophyta  | Nephroselmidophyceae |                       |                        | <i>Nephroselmis</i>       |
| 391 | Plantae  | Chlorophyta  | Prasinophyceae       | Mamiellales           | Mamiellaceae           | <i>Mantoniella</i>        |
| 392 | Plantae  | Chlorophyta  | Prasinophyceae       | Pseudoscourfieldiales | Pycnococcaceae         | <i>Prasinoderma</i>       |
| 393 | Plantae  | Chlorophyta  | Prasinophyceae       | Pseudoscourfieldiales | Pycnococcaceae         | <i>Pseudoscourfieldia</i> |
| 394 | Plantae  | Chlorophyta  | Trebouxiophyceae     |                       |                        |                           |
| 395 | Plantae  | Chlorophyta  | Ulvophyceae          | Dasycladales          | Polyphysaceae          | <i>Acetabularia</i>       |
| 396 | Plantae  | Chlorophyta  | Ulvophyceae          | Oltmannsiellopsidales | Oltmannsiellopsidaceae | <i>Oltmannsiellopsis</i>  |
| 397 | Plantae  | Chlorophyta  | Ulvophyceae          | Ulvaes                | Ulvaceae               | <i>Ulva</i>               |
| 398 | Plantae  | Chlorophyta  | Ulvophyceae          | Ulvaes                | Ulvellaceae            | <i>Ochlochaete</i>        |
| 399 | Plantae  | Chlorophyta  |                      | Prasinococcales       |                        | <i>Prasinoderma</i>       |
| 400 | Plantae  | Chlorophyta  |                      | Pyramimonadales       |                        | <i>Pyramimonas</i>        |
| 401 | Plantae  | Chlorophyta  |                      |                       | Prasinophyceae         |                           |
| 402 | Plantae  | Chlorophyta  |                      |                       | Pycnococcaceae         | <i>Pycnococcus</i>        |
| 403 | Plantae  | Chlorophyta  | Glaucozystophyceae   |                       | Cyanophoraceae         | <i>Cyanophora</i>         |
| 404 | Plantae  | Rhodophyta   | Florideophyceae      | Acrochaetiales        | Acrochaetiaceae        | <i>Acrochaetium</i>       |
| 405 | Plantae  | Rhodophyta   | Florideophyceae      | Ceramiales            | Ceramiaceae            |                           |
| 406 | Plantae  | Rhodophyta   | Florideophyceae      | Ceramiales            | Rhodomelaceae          |                           |
| 407 | Plantae  | Rhodophyta   | Florideophyceae      | Corallinales          |                        |                           |
| 408 | Plantae  | Rhodophyta   | Florideophyceae      | Gigartinales          | Peyssonneliaceae       | <i>Sonderopelta</i>       |
| 409 | Plantae  | Rhodophyta   | Florideophyceae      | Gigartinales          | Solieriaceae           |                           |
| 410 | Plantae  | Rhodophyta   | Florideophyceae      | Rhodymeniales         | Lomentariaceae         |                           |
| 411 | Plantae  | Rhodophyta   | Florideophyceae      | Rhodymeniales         | Rhodymeniaceae         | <i>Coelothrix</i>         |
| 412 | Plantae  | Streptophyta | Equisetopsida        | Apiales               | Apiaceae               |                           |
| 413 | Plantae  | Streptophyta | Equisetopsida        | Asterales             | Asteraceae             |                           |
| 414 | Plantae  | Streptophyta | Equisetopsida        | Brassicales           | Caricaceae             |                           |
| 415 | Plantae  | Streptophyta | Equisetopsida        | Caryophyllales        | Amaranthaceae          |                           |
| 416 | Plantae  | Streptophyta | Equisetopsida        | Cucurbitales          | Cucurbitaceae          |                           |
| 417 | Plantae  | Streptophyta | Equisetopsida        | Fabales               | Fabaceae               |                           |
| 418 | Plantae  | Streptophyta | Equisetopsida        | Poales                | Poaceae                |                           |
| 419 | Plantae  | Streptophyta | Equisetopsida        | Sapindales            | Rutaceae               |                           |
| 420 | Plantae  | Streptophyta | Equisetopsida        | Solanales             | Solanaceae             | <i>Solanum</i>            |
| 421 | Plantae  | Streptophyta |                      | Lamiales              | Acanthaceae            | <i>Lankesteria</i>        |
| 422 | Plantae  | Streptophyta |                      | Magnoliales           | Magnoliaceae           |                           |
| 423 | Protozoa | Amoebozoa    |                      | Dactylopodida         | Vexilliferidae         | <i>Neoparamoeba</i>       |
| 424 | Protozoa | Apusozoa     |                      |                       | Apusomonadidae         | <i>Thecamonas</i>         |
| 425 | Protozoa | Apusozoa     |                      |                       | Planomonadidae         | <i>Planomonas</i>         |
| 426 | Protozoa | Apusozoa     |                      |                       |                        | <i>Ancyromonas</i>        |
| 427 | Protozoa | Choanozoa    | Choanoflagellata     | Choanoflagellida      | Codonosigidae          | <i>Monosiga</i>           |
| 428 | Protozoa | Choanozoa    | Choanoflagellata     | Choanoflagellida      | Stephanoecidae         | <i>Diaphanoeca</i>        |
| 429 | Protozoa | Choanozoa    | Choanoflagellata     | Choanoflagellida      | Stephanoecidae         | <i>Stephanoeca</i>        |
| 430 | Protozoa | Choanozoa    | Ichthyosporea        |                       |                        |                           |
| 431 | Protozoa | Picozoa      | Picomonadea          | Picomonadida          | Picomonadidae          |                           |
| 432 | Protozoa | Picozoa      |                      |                       |                        |                           |
| 433 | Unranked |              |                      |                       |                        | <i>Cantina</i>            |
| 434 | Unranked |              |                      |                       |                        | <i>Pirsonia</i>           |

Highlighted taxa were removed from the analysis



Supplementary Data 3 - 18SV4 taxa

| Count | Kingdom   | Phylum          | Class               | Order             | Family              | Genus                   | Species |
|-------|-----------|-----------------|---------------------|-------------------|---------------------|-------------------------|---------|
| 1     | Animalia  | Annelida        | Polychaeta          | Capitellida       | Capitellidae        |                         |         |
| 2     | Animalia  | Annelida        | Polychaeta          | Eunicida          | Eunicidae           | <i>Eunice</i>           |         |
| 3     | Animalia  | Annelida        | Polychaeta          | Phyllodocida      | Chrysopetalidae     | <i>Chrysopetalum</i>    |         |
| 4     | Animalia  | Annelida        | Polychaeta          | Phyllodocida      | Hesionidae          |                         |         |
| 5     | Animalia  | Annelida        | Polychaeta          | Phyllodocida      | Nereididae          | <i>Ceratonereis</i>     |         |
| 6     | Animalia  | Annelida        | Polychaeta          | Phyllodocida      | Syllidae            | <i>Branchiosyllis</i>   |         |
| 7     | Animalia  | Annelida        | Polychaeta          | Phyllodocida      | Syllidae            | <i>Erinaceusyllis</i>   |         |
| 8     | Animalia  | Annelida        | Polychaeta          | Phyllodocida      | Syllidae            | <i>Exogone</i>          |         |
| 9     | Animalia  | Annelida        | Polychaeta          | Sabellida         | Fabriciidae         | <i>Fabricinuda</i>      |         |
| 10    | Animalia  | Annelida        | Polychaeta          | Sabellida         | Fabriciidae         | <i>Pseudofabriciola</i> |         |
| 11    | Animalia  | Annelida        | Polychaeta          | Sabellida         | Serpulidae          |                         |         |
| 12    | Animalia  | Annelida        | Polychaeta          | Spionida          | Chaetopteridae      |                         |         |
| 13    | Animalia  | Annelida        | Polychaeta          | Spionida          | Spionidae           | <i>Aurospio</i>         |         |
| 14    | Animalia  | Annelida        | Polychaeta          | Spionida          | Spionidae           | <i>Spio</i>             |         |
| 15    | Animalia  | Annelida        | Polychaeta          | Terebellida       | Terebellidae        |                         |         |
| 16    | Animalia  | Annelida        | Polychaeta          |                   | Opheliidae          |                         |         |
| 17    | Animalia  | Annelida        | Polychaeta          |                   | Orbiniidae          |                         |         |
| 18    | Animalia  | Annelida        | Polychaeta          |                   | Protodrilidae       | <i>Protodrilus</i>      |         |
| 19    | Animalia  | Arthropoda      | Maxillopoda         | Cyclopoida        |                     |                         |         |
| 20    | Animalia  | Arthropoda      | Maxillopoda         | Harpacticoida     | Ameiridae           |                         |         |
| 21    | Animalia  | Arthropoda      | Maxillopoda         | Harpacticoida     | Canuellidae         |                         |         |
| 22    | Animalia  | Arthropoda      | Maxillopoda         | Poecilostomatoida | Catiniidae          |                         |         |
| 23    | Animalia  | Arthropoda      | Maxillopoda         | Poecilostomatoida | Lichomolgidae       | <i>Lichomolgus</i>      |         |
| 24    | Animalia  | Arthropoda      | Maxillopoda         | Poecilostomatoida | Pseudanthessiidae   | <i>Pseudanthessus</i>   |         |
| 25    | Animalia  | Brachiopoda     | Rhynchonellata      |                   |                     |                         |         |
| 26    | Animalia  | Chaetognatha    |                     | Biphragmophora    | Spadellidae         | <i>Spadella</i>         |         |
| 27    | Animalia  | Chordata        | Actinopterygii      | Cluperiformes     | Clupeidae           |                         |         |
| 28    | Animalia  | Chordata        | Actinopterygii      | Scorpaeniformes   |                     |                         |         |
| 29    | Animalia  | Chordata        | Actinopterygii      | Siluriformes      |                     |                         |         |
| 30    | Animalia  | Chordata        | Actinopterygii      | Tetraodontiformes | Tetraodontidae      |                         |         |
| 31    | Animalia  | Chordata        | Ascidiacea          |                   |                     |                         |         |
| 32    | Animalia  | Chordata        | Chondrichthyes      | Myliobatiformes   | Dasyatidae          |                         |         |
| 33    | Animalia  | Chordata        | Ophiuroidea         | Ophiurida         |                     |                         |         |
| 34    | Animalia  | Cnidaria        | Anthozoa            | Actinaria         |                     |                         |         |
| 35    | Animalia  | Cnidaria        | Anthozoa            | Scleractinia      | Acroporidae         | <i>Montipora</i>        |         |
| 36    | Animalia  | Cnidaria        | Anthozoa            | Scleractinia      | Pocilloporidae      | <i>Pocillopora</i>      |         |
| 37    | Animalia  | Cnidaria        | Hydrozoa            | Leptothecata      | Campanulariidae     |                         |         |
| 38    | Animalia  | Cnidaria        | Hydrozoa            | Leptothecata      | Mitrocomidae        | <i>Mitrocomella</i>     |         |
| 39    | Animalia  | Cnidaria        | Hydrozoa            | Leptothecata      | Sertulariidae       |                         |         |
| 40    | Animalia  | Ctenophora      |                     |                   |                     |                         |         |
| 41    | Animalia  | Echinodermata   | Echinoidea          |                   |                     |                         |         |
| 42    | Animalia  | Echinodermata   | Holothuroidea       |                   |                     |                         |         |
| 43    | Animalia  | Mollusca        | Bivalvia            | Limoida           | Limidae             | <i>Limaria</i>          |         |
| 44    | Animalia  | Mollusca        | Bivalvia            | Lucinoida         | Lucinidae           |                         |         |
| 45    | Animalia  | Mollusca        | Bivalvia            | Mytiloida         | Mytilidae           |                         |         |
| 46    | Animalia  | Mollusca        | Bivalvia            | Ostreoida         | Ostreidae           | <i>Lopha</i>            |         |
| 47    | Animalia  | Mollusca        | Bivalvia            | Pterioida         | Isognomonidae       | <i>Isognomon</i>        |         |
| 48    | Animalia  | Mollusca        | Bivalvia            | Veneroida         | Petricolidae        |                         |         |
| 49    | Animalia  | Mollusca        | Gastropoda          |                   |                     |                         |         |
| 50    | Animalia  | Mollusca        | Polyplacophora      | Neoloricata       | Mopaliidae          |                         |         |
| 51    | Animalia  | Nemertea        | Enopla              | Monostilifera     | Tetrastemmatidae    | <i>Tetrastemma</i>      |         |
| 52    | Animalia  | Nemertea        | Palaeonemertea      |                   | Cephalothricidae    | <i>Cephalothrix</i>     |         |
| 53    | Animalia  | Platyhelminthes | Rhabditophora       | Polycladida       |                     |                         |         |
| 54    | Animalia  | Platyhelminthes | Turbellaria         | Macrostomida      | Macrostomidae       |                         |         |
| 55    | Animalia  | Platyhelminthes | Turbellaria         | Macrostomida      | Microstomidae       |                         |         |
| 56    | Animalia  | Porifera        | Calcarea            |                   |                     |                         |         |
| 57    | Animalia  | Porifera        | Deomspongiae        | Haplosclerida     |                     |                         |         |
| 58    | Animalia  | Porifera        | Homoscleromorpha    | Homosclerophorida | Plakinidae          |                         |         |
| 59    | Animalia  | Xenacoelomorpha | Acoela              |                   | Isodiametridae      |                         |         |
| 60    | Chromista | Bigyra          | Labyrinthulomycetes |                   | Thraustochytriaceae | <i>Aplanochytrium</i>   |         |
| 61    | Chromista | Bigyra          |                     | Bicosoecida       | Bicosoecidae        | <i>Bicosoeca</i>        |         |
| 62    | Chromista | Cercozoa        | Sarcomonadea        | Cercomonadida     | Cercomonadidae      | <i>Massisteria</i>      |         |
| 63    | Chromista | Cercozoa        | Thecofilosea        | Cryomonadida      |                     | <i>Cryothecomonas</i>   |         |
| 64    | Chromista | Ciliophora      | Oligohymenophorea   | Hymenostomatida   |                     |                         |         |
| 65    | Chromista | Ciliophora      | Oligohymenophorea   | Peniculida        |                     |                         |         |
| 66    | Chromista | Ciliophora      | Oligohymenophorea   | Philasterida      | Cinetochilidae      | <i>Cinetochilum</i>     |         |
| 67    | Chromista | Ciliophora      | Oligohymenophorea   | Philasterida      | Cohnilembidae       | <i>Cohnilembus</i>      |         |
| 68    | Chromista | Ciliophora      | Oligohymenophorea   | Philasterida      | Cohnilembidae       | <i>Porpostoma</i>       |         |
| 69    | Chromista | Ciliophora      | Oligohymenophorea   | Philasterida      | Orchitophryidae     | <i>Metanophrys</i>      |         |

|     |           |                |                     |                   |                     |                             |
|-----|-----------|----------------|---------------------|-------------------|---------------------|-----------------------------|
| 70  | Chromista | Ciliophora     | Oligohymenophorea   | Philasterida      | Orchitophryidae     | <i>Paranophrys</i>          |
| 71  | Chromista | Ciliophora     | Oligohymenophorea   | Philasterida      | Philasteridae       |                             |
| 72  | Chromista | Ciliophora     | Oligohymenophorea   | Philasterida      | Uronematidae        | <i>Uronemella</i>           |
| 73  | Chromista | Ciliophora     | Oligohymenophorea   | Pleurodematida    | Pleurodematidae     | <i>Pleuronema coronatum</i> |
| 74  | Chromista | Ciliophora     | Phyllopharyngea     | Dysteriida        | Dysteriidae         | <i>Dysteria</i>             |
| 75  | Chromista | Ciliophora     | Prostomatea         | Prorodontida      | Colepidae           | <i>Tiarina</i>              |
| 76  | Chromista | Ciliophora     | Prostomatea         | Prorodontida      | Urotrichidae        | <i>Urotricha</i>            |
| 77  | Chromista | Ciliophora     | Spirotrichea        | Choreotrichida    | Strombidinopsidae   | <i>Parastrombidinopsis</i>  |
| 78  | Chromista | Ciliophora     | Spirotrichea        | Euplotida         | Uronychiidae        | <i>Diophrys</i>             |
| 79  | Chromista | Ciliophora     | Spirotrichea        | Tintinnida        |                     |                             |
| 80  | Chromista | Ciliophora     | Spirotrichea        |                   | Strombidiidae       | <i>Strombidium</i>          |
| 81  | Chromista | Cryptophyta    | Cryptophyceae       | Cryptomonadales   | Cryptomonadaceae    |                             |
| 82  | Chromista | Cryptophyta    | Cryptophyceae       | Cryptomonadales   | Goniomonadaceae     | <i>Goniomonas</i>           |
| 83  | Chromista | Cryptophyta    | Cryptophyceae       | Cryptomonadales   | Hemiselmidae        | <i>Hemiselmis</i>           |
| 84  | Chromista | Cryptophyta    | Cryptophyceae       | Pyrenomonadales   | Geminigeraceae      | <i>Teleaulax</i>            |
| 85  | Chromista | Cryptophyta    | Cryptophyceae       | Pyrenomonadales   | Pyrenomonadaceae    | <i>Rhodomonas</i>           |
| 86  | Chromista | Cryptophyta    | Katablepharidophyta |                   | Katablepharidaceae  |                             |
| 87  | Chromista | Cryptophyta    | Telonemea           | Telonemida        |                     | <i>Telonema</i>             |
| 88  | Chromista | Dinoflagellata | Dinophyceae         | Gonyaulacales     | Amphidomataceae     | <i>Amphidoma</i>            |
| 89  | Chromista | Dinoflagellata | Dinophyceae         | Gonyaulacales     | Amphidomataceae     | <i>Azadinium</i>            |
| 90  | Chromista | Dinoflagellata | Dinophyceae         | Gonyaulacales     | Ceratiaceae         | <i>Neoceratium</i>          |
| 91  | Chromista | Dinoflagellata | Dinophyceae         | Gonyaulacales     | Gonyaulaceae        | <i>Alexandrium</i>          |
| 92  | Chromista | Dinoflagellata | Dinophyceae         | Gonyaulacales     | Gonyaulaceae        | <i>Gonyaulax</i>            |
| 93  | Chromista | Dinoflagellata | Dinophyceae         | Gymnodiniales     | Brachidiniaceae     | <i>Brachidinium</i>         |
| 94  | Chromista | Dinoflagellata | Dinophyceae         | Gymnodiniales     | Gymnodiniaceae      | <i>Gymnodinium klebsii</i>  |
| 95  | Chromista | Dinoflagellata | Dinophyceae         | Gymnodiniales     | Gymnodiniaceae      | <i>Cochlodinium</i>         |
| 96  | Chromista | Dinoflagellata | Dinophyceae         | Gymnodiniales     | Gymnodiniaceae      | <i>Gymnodinium</i>          |
| 97  | Chromista | Dinoflagellata | Dinophyceae         | Gymnodiniales     | Gymnodiniaceae      | <i>Gyrodinium</i>           |
| 98  | Chromista | Dinoflagellata | Dinophyceae         | Gymnodiniales     | Gymnodiniaceae      | <i>Lepidodinium</i>         |
| 99  | Chromista | Dinoflagellata | Dinophyceae         | Gymnodiniales     | Gymnodiniaceae      | <i>Paragymnodinium</i>      |
| 100 | Chromista | Dinoflagellata | Dinophyceae         | Gymnodiniales     | Karenaceae          | <i>Karenia</i>              |
| 101 | Chromista | Dinoflagellata | Dinophyceae         | Gymnodiniales     | Karenaceae          | <i>Karlodinium</i>          |
| 102 | Chromista | Dinoflagellata | Dinophyceae         | Gymnodiniales     | Warnowiaceae        | <i>Warnowia</i>             |
| 103 | Chromista | Dinoflagellata | Dinophyceae         | Peridiniales      | Glenodiniaceae      | <i>Glenodinium</i>          |
| 104 | Chromista | Dinoflagellata | Dinophyceae         | Peridiniales      | Heterocapsaceae     | <i>Heterocapsa</i>          |
| 105 | Chromista | Dinoflagellata | Dinophyceae         | Peridiniales      | Peridiniaceae       | <i>Pentapleura</i>          |
| 106 | Chromista | Dinoflagellata | Dinophyceae         | Peridiniales      | Peridiniaceae       | <i>Peridinium</i>           |
| 107 | Chromista | Dinoflagellata | Dinophyceae         | Peridiniales      | Podolampaceae       | <i>Blepharocysta</i>        |
| 108 | Chromista | Dinoflagellata | Dinophyceae         | Peridiniales      | Podolampaceae       | <i>Podolampas</i>           |
| 109 | Chromista | Dinoflagellata | Dinophyceae         | Peridiniales      | Protoperidiniaceae  | <i>Protoperidinium</i>      |
| 110 | Chromista | Dinoflagellata | Dinophyceae         | Peridiniales      | Thoracosphaeraceae  | <i>Scrippsiella</i>         |
| 111 | Chromista | Dinoflagellata | Dinophyceae         | Peridiniales      |                     | <i>Galeidinium</i>          |
| 112 | Chromista | Dinoflagellata | Dinophyceae         | Prorocentrales    | Prorocentraceae     | <i>Prorocentrum</i>         |
| 113 | Chromista | Dinoflagellata | Dinophyceae         | Pyrocystales      | Pyrocystaceae       | <i>Dissodinium</i>          |
| 114 | Chromista | Dinoflagellata | Dinophyceae         | Suessiales        | Symbiodiniaceae     | <i>Symbiodinium</i>         |
| 115 | Chromista | Dinoflagellata | Dinophyceae         | Syndiniales       | Amoebophryaceae     | <i>Amoebophrya</i>          |
| 116 | Chromista | Dinoflagellata | Dinophyceae         | Syndiniales       | Syndiniaceae        | <i>Hematodinium</i>         |
| 117 | Chromista | Dinoflagellata | Dinophyceae         |                   |                     | <i>Stoeckeria</i>           |
| 118 | Chromista | Haptophyta     | Chrysophyceae       | Chromulinales     | Chromulinaceae      |                             |
| 119 | Chromista | Haptophyta     | Chrysophyceae       | Chromulinales     | Paraphysomonadaceae | <i>Paraphysomonas</i>       |
| 120 | Chromista | Myxozoa        | Perkinsea           | Perkinsida        | Perkinsidae         |                             |
| 121 | Chromista | Ochrophyta     | Bacillariophyceae   | Achnanthes        |                     |                             |
| 122 | Chromista | Ochrophyta     | Bacillariophyceae   | Bacillariales     | Bacillariaceae      | <i>Cylindrotheca</i>        |
| 123 | Chromista | Ochrophyta     | Bacillariophyceae   | Bacillariales     | Bacillariaceae      | <i>Nitzschia</i>            |
| 124 | Chromista | Ochrophyta     | Bacillariophyceae   | Bacillariales     | Bacillariaceae      | <i>Pseudo-nitzschia</i>     |
| 125 | Chromista | Ochrophyta     | Bacillariophyceae   | Naviculales       | Naviculaceae        | <i>Meuniera</i>             |
| 126 | Chromista | Ochrophyta     | Bacillariophyceae   | Naviculales       | Naviculaceae        | <i>Navicula</i>             |
| 127 | Chromista | Ochrophyta     | Bacillariophyceae   | Naviculales       | Pleurosigmales      |                             |
| 128 | Chromista | Ochrophyta     | Bacillariophyceae   | Thalassiosiphales | Catenulaceae        | <i>Amphora</i>              |
| 129 | Chromista | Ochrophyta     | Coscinodiscophyceae | Chaetocerotales   | Chaetocerotaceae    |                             |
| 130 | Chromista | Ochrophyta     | Coscinodiscophyceae | Corethrales       | Corethraceae        | <i>Corethron</i>            |
| 131 | Chromista | Ochrophyta     | Coscinodiscophyceae | Coscinodisciales  | Hemidiscaceae       | <i>Actinocyclus</i>         |
| 132 | Chromista | Ochrophyta     | Coscinodiscophyceae | Leptocylindrales  | Leptocylindraceae   |                             |
| 133 | Chromista | Ochrophyta     | Coscinodiscophyceae | Rhizoleniales     | Rhizosoleniaceae    | <i>Guinardia</i>            |
| 134 | Chromista | Ochrophyta     | Coscinodiscophyceae | Rhizoleniales     | Rhizosoleniaceae    | <i>Rhizosolenia</i>         |
| 135 | Chromista | Ochrophyta     | Coscinodiscophyceae | Thalassiosiphales | Skeletonemataceae   | <i>Skeletonema</i>          |
| 136 | Chromista | Ochrophyta     | Coscinodiscophyceae | Thalassiosiphales | Thalassiosiraceae   | <i>Minidiscus</i>           |
| 137 | Chromista | Ochrophyta     | Coscinodiscophyceae | Thalassiosiphales | Thalassiosiraceae   | <i>Thalassiosira</i>        |
| 138 | Chromista | Ochrophyta     | Dictyochophyceae    | Florentiellales   |                     | <i>Florentiella</i>         |
| 139 | Chromista | Ochrophyta     | Dictyochophyceae    | Pedinellales      |                     | <i>Pseudopedinella</i>      |
| 140 | Chromista | Ochrophyta     | Fragilariophyceae   | Fragilariales     | Fragilariaceae      | <i>Opephora</i>             |



Supplementary Data 3 - 18S V1-V3 taxa

| Count | Kingdom   | Phylum          | Class               | Order                | Family               | Genus                     | Species              |
|-------|-----------|-----------------|---------------------|----------------------|----------------------|---------------------------|----------------------|
| 1     | Animalia  | Annelida        | Phascolosomatidea   | Phascolosomatiformes | Phascolosomatidae    | <i>Phascolosoma</i>       |                      |
| 2     | Animalia  | Annelida        | Polychaeta          | Capitellida          | Capitellidae         | <i>Dasybranchus</i>       |                      |
| 3     | Animalia  | Annelida        | Polychaeta          | Eunicida             | Eunicidae            | <i>Eunice</i>             |                      |
| 4     | Animalia  | Annelida        | Polychaeta          | Phyllodocida         | Syllidae             | <i>Salvatoria</i>         |                      |
| 5     | Animalia  | Annelida        | Polychaeta          | Sabellida            | Fabriciidae          | <i>Fabricinuda</i>        |                      |
| 6     | Animalia  | Annelida        | Polychaeta          | Sabellida            | Sabellidae           |                           |                      |
| 7     | Animalia  | Annelida        | Polychaeta          |                      | Opheliidae           |                           |                      |
| 8     | Animalia  | Annelida        | Polychaeta          |                      | Spionidae            | <i>Spio</i>               |                      |
| 9     | Animalia  | Annelida        | Polychaeta          |                      | Terebellidae         |                           |                      |
| 10    | Animalia  | Arthropoda      | Maxillopoda         | Calanoida            | Acartiidae           |                           |                      |
| 11    | Animalia  | Arthropoda      | Maxillopoda         | Cyclopoida           |                      |                           |                      |
| 12    | Animalia  | Arthropoda      | Maxillopoda         | Poecilostomatoida    | Catiniidae           |                           |                      |
| 13    | Animalia  | Arthropoda      | Maxillopoda         | Poecilostomatoida    | Lichomolgidae        | <i>Lichomolgus</i>        |                      |
| 14    | Animalia  | Chordata        | Actinopterygii      | Perciformes          |                      |                           |                      |
| 15    | Animalia  | Chordata        | Asciacea            | Pleurogona           | Stylelidae           | <i>Botryllus</i>          |                      |
| 16    | Animalia  | Chordata        | Asciacea            | Stolidobranchia      | Pyuridae             | <i>Pyura</i>              |                      |
| 17    | Animalia  | Cnidaria        | Anthozoa            | Actiniaria           |                      |                           |                      |
| 18    | Animalia  | Cnidaria        | Hydrozoa            | Leptothecata         |                      |                           |                      |
| 19    | Animalia  | Cnidaria        |                     | Bivalvulida          | Myxidiidae           |                           |                      |
| 20    | Animalia  | Ctenophora      | Tentaculata         | Platyctenida         | Coeloplanidae        | <i>Vallricula</i>         |                      |
| 21    | Animalia  | Echinodermata   | Echinoidea          |                      |                      |                           |                      |
| 22    | Animalia  | Gastrotricha    |                     | Chaetonotida         | Chaetonotidae        |                           |                      |
| 23    | Animalia  | Mollusca        | Bivalvia            | Limoida              | Limidae              | <i>Limaria</i>            |                      |
| 24    | Animalia  | Mollusca        | Bivalvia            | Mytiloida            | Mytilidae            |                           |                      |
| 25    | Animalia  | Mollusca        | Bivalvia            | Ostreoida            | Ostreidae            |                           |                      |
| 26    | Animalia  | Mollusca        | Bivalvia            | Solemyoida           | Solemyidae           | <i>Solemya</i>            |                      |
| 27    | Animalia  | Mollusca        | Bivalvia            | Veneroida            | Cardiidae            | <i>Fragum</i>             |                      |
| 28    | Animalia  | Mollusca        | Bivalvia            | Veneroida            | Lucinidae            |                           |                      |
| 29    | Animalia  | Mollusca        | Gastropoda          |                      | Strombidae           | <i>Lambis</i>             |                      |
| 30    | Animalia  | Nematoda        | Chromadorea         | Chromadorida         | Chromadoridae        |                           |                      |
| 31    | Animalia  | Nemertea        | Enopla              |                      |                      |                           |                      |
| 32    | Animalia  | Platyhelminthes | Monogenea           |                      |                      |                           |                      |
| 33    | Animalia  | Platyhelminthes | Trematoda           |                      |                      |                           |                      |
| 34    | Animalia  | Platyhelminthes | Turbellaria         | Macrostomida         | Macrostomidae        |                           |                      |
| 35    | Animalia  | Platyhelminthes | Turbellaria         | Rhabdozoa            |                      |                           |                      |
| 36    | Animalia  | Porifera        | Calcarea            |                      |                      |                           |                      |
| 37    | Animalia  | Porifera        | Demospongiae        | Dictyoceratida       |                      |                           |                      |
| 38    | Animalia  | Porifera        | Demospongiae        | Haplosclerida        |                      |                           |                      |
| 39    | Animalia  | Xenacoelomorpha | Acoela              |                      | Isodiametridae       |                           |                      |
| 40    | Chromista | Bigyra          | Labyrinthulomycetes | Labyrinthulomycetes  | Thraustochytriaceae  | <i>Aplanochytrium</i>     |                      |
| 41    | Chromista | Bigyra          |                     | Bicosoecida          |                      | <i>Ceacitellus</i>        |                      |
| 42    | Chromista | Cercozoa        | Imbricatea          | Thaumatomastigida    | Thaumatomastigidae   |                           |                      |
| 43    | Chromista | Ciliophora      | Heterotrichea       | Heterotrichida       | Condylostomatidae    | <i>Condylostoma</i>       |                      |
| 44    | Chromista | Ciliophora      | Litostomatea        | Haptorida            | Lacrymariidae        | <i>Lacrymaria</i>         |                      |
| 45    | Chromista | Ciliophora      | Litostomatea        | Pleurostomatida      | Litonotidae          | <i>Litonotus</i>          |                      |
| 46    | Chromista | Ciliophora      | Nassophorea         | Synhymeniida         | Orthodonellidae      | <i>Zosterodasys</i>       |                      |
| 47    | Chromista | Ciliophora      | Oligohymenophorea   | Philasterida         | Loxocephalidae       | <i>Cardiostomatella</i>   |                      |
| 48    | Chromista | Ciliophora      | Oligohymenophorea   | Philasterida         | Uronematidae         | <i>Uronema</i>            | <i>heteromarinum</i> |
| 49    | Chromista | Ciliophora      | Oligohymenophorea   | Pleuronematida       | Cyclidiidae          | <i>Cyclidium</i>          |                      |
| 50    | Chromista | Ciliophora      | Spirotrichea        | Choreotrichida       | Strobilidiidae       | <i>Pelagostrobilidium</i> |                      |
| 51    | Chromista | Ciliophora      | Spirotrichea        | Choreotrichida       | Strobilidiidae       | <i>Rimostrobilidium</i>   |                      |
| 52    | Chromista | Ciliophora      | Spirotrichea        | Choreotrichida       | Strombidinopsidae    | <i>Strombidinopsis</i>    |                      |
| 53    | Chromista | Ciliophora      | Spirotrichea        | Euplotida            | Uronychiidae         | <i>Diophrys</i>           |                      |
| 54    | Chromista | Ciliophora      | Spirotrichea        | Sporadotrichida      | Oxytrichidae         | <i>Hemigastrostyla</i>    |                      |
| 55    | Chromista | Ciliophora      | Spirotrichea        | Tintinnida           | Tintinnidae          |                           |                      |
| 56    | Chromista | Ciliophora      | Spirotrichea        | Urostylida           | Holostichidae        | <i>Holosticha</i>         | <i>diademata</i>     |
| 57    | Chromista | Ciliophora      | Spirotrichea        |                      | Cyrtostrombidiidae   | <i>Cyrtostrombidium</i>   |                      |
| 58    | Chromista | Ciliophora      | Spirotrichea        |                      | Strombidiidae        | <i>Strombidium</i>        |                      |
| 59    | Chromista | Ciliophora      | Spirotrichea        |                      | Totoniidae           | <i>Pseudotontonia</i>     |                      |
| 60    | Chromista | Ciliophora      | Spirotrichea        |                      |                      | <i>Protocruzia</i>        |                      |
| 61    | Chromista | Cryptophyta     | Cryptophyceae       | Cryptomonadales      | Goniomonadaceae      | <i>Goniomonas</i>         |                      |
| 62    | Chromista | Cryptophyta     | Cryptophyceae       | Pyrenomonadales      | Geminigeraceae       | <i>Proteomonas</i>        |                      |
| 63    | Chromista | Cryptophyta     | Cryptophyceae       | Pyrenomonadales      | Geminigeraceae       | <i>Teleaulax</i>          |                      |
| 64    | Chromista | Cryptophyta     | Telonemea           | Telonemida           |                      | <i>Telonema</i>           |                      |
| 65    | Chromista | Haptophyta      | Coccolithophyceae   | Phaeocystales        | Phaeocystaceae       | <i>Phaeocystis</i>        |                      |
| 66    | Chromista | Haptophyta      | Coccolithophyceae   | Prymnesiales         | Chrysochromulinaceae | <i>Chrysochromulina</i>   |                      |
| 67    | Chromista | Haptophyta      | Pavlovophycidae     | Pavlovales           | Pavlovaceae          | <i>Pavlova</i>            | <i>pinguis</i>       |
| 68    | Chromista | Heliozoa        | Centrohelea         | Centroheliida        | Acanthocystidae      | <i>Raineriophrys</i>      |                      |
| 69    | Chromista | Myzozoa         | Dinophyceae         | Gonyaulacales        | Amphidomataceae      | <i>Amphidoma</i>          |                      |
| 70    | Chromista | Myzozoa         | Dinophyceae         | Gonyaulacales        | Amphidomataceae      | <i>Azadinium</i>          |                      |
| 71    | Chromista | Myzozoa         | Dinophyceae         | Gonyaulacales        | Gonyaulacaceae       | <i>Alexandrium</i>        |                      |

|     |           |                 |                     |                    |                     |                          |               |
|-----|-----------|-----------------|---------------------|--------------------|---------------------|--------------------------|---------------|
| 72  | Chromista | Myzozoa         | Dinophyceae         | Gonyaulacales      | Gonyaulacaceae      | <i>Gonyaulax</i>         |               |
| 73  | Chromista | Myzozoa         | Dinophyceae         | Gymnodiniales      | Gymnodiniaceae      | <i>Amphidinium</i>       |               |
| 74  | Chromista | Myzozoa         | Dinophyceae         | Gymnodiniales      | Gymnodiniaceae      | <i>Gymnodinium</i>       |               |
| 75  | Chromista | Myzozoa         | Dinophyceae         | Gymnodiniales      | Gymnodiniaceae      | <i>Gyrodinium</i>        |               |
| 76  | Chromista | Myzozoa         | Dinophyceae         | Gymnodiniales      | Gymnodiniaceae      | <i>Paragymnodinium</i>   |               |
| 77  | Chromista | Myzozoa         | Dinophyceae         | Lophodinales       | Lophodiniaceae      | <i>Woloszynskia</i>      |               |
| 78  | Chromista | Myzozoa         | Dinophyceae         | Peridinales        | Heterocapsaceae     | <i>Heterocapsa</i>       |               |
| 79  | Chromista | Myzozoa         | Dinophyceae         | Peridinales        | Peridiniaceae       | <i>Pentaparsodinium</i>  |               |
| 80  | Chromista | Myzozoa         | Dinophyceae         | Peridinales        | Peridiniaceae       | <i>Peridinium</i>        |               |
| 81  | Chromista | Myzozoa         | Dinophyceae         | Peridinales        | Pfiesteriaceae      |                          |               |
| 82  | Chromista | Myzozoa         | Dinophyceae         | Peridinales        | Protoperidiniaceae  | <i>Protoperidinium</i>   |               |
| 83  | Chromista | Myzozoa         | Dinophyceae         | Peridinales        |                     | <i>Galeidinium</i>       |               |
| 84  | Chromista | Myzozoa         | Dinophyceae         | Prorocentrales     | Prorocentraceae     | <i>Exuviaella</i>        |               |
| 85  | Chromista | Myzozoa         | Dinophyceae         | Prorocentrales     | Prorocentraceae     | <i>Prorocentrum</i>      |               |
| 86  | Chromista | Myzozoa         | Dinophyceae         | Syndiniales        | Amoebophryaceae     | <i>Amoebophrya</i>       |               |
| 87  | Chromista | Myzozoa         | Dinophyceae         | Syndiniales        | Duboscquellidae     | <i>Duboscquella</i>      |               |
| 88  | Chromista | Myzozoa         | Dinophyceae         | Syndiniales        | Syndiniaceae        | <i>Hematodinium</i>      | <i>perezi</i> |
| 89  | Chromista | Myzozoa         | Gregarinasina       | Eugregarinorida    | Gregarinidae        |                          |               |
| 90  | Chromista | Myzozoa         | Gregarinasina       | Eugregarinorida    | Lecudinidae         | <i>Lankesteria</i>       |               |
| 91  | Chromista | Myzozoa         | Gregarinasina       | Eugregarinorida    | Lecudinidae         | <i>Lecudina</i>          |               |
| 92  | Chromista | Myzozoa         | Perkinsea           | Perkinsida         | Perkinsidae         | <i>Perkinsus</i>         |               |
| 93  | Chromista | Ochrophyta      | Bacillariophyceae   | Bacillariales      | Bacillariaceae      | <i>Pseudo-nitzschia</i>  |               |
| 94  | Chromista | Ochrophyta      | Coscinodiscophyceae | Chaetocerotales    | Chaetocerotaceae    | <i>Chaetoceros</i>       |               |
| 95  | Chromista | Ochrophyta      | Coscinodiscophyceae | Coscinodiscales    | Hemidiscaceae       | <i>Actinocyclus</i>      |               |
| 96  | Chromista | Ochrophyta      | Coscinodiscophyceae | Thalassiosirales   | Skeletonemataceae   | <i>Skeletonema</i>       |               |
| 97  | Chromista | Ochrophyta      | Coscinodiscophyceae | Thalassiosirales   | Thalassiosiraceae   | <i>Thalassiosira</i>     |               |
| 98  | Chromista | Ochrophyta      | Dictyochophyceae    | Florenciellales    |                     | <i>Florenciella</i>      |               |
| 99  | Chromista | Ochrophyta      | Dictyochophyceae    | Rhizochromulinales |                     | <i>Rhizochromulina</i>   |               |
| 100 | Chromista | Ochrophyta      | Fragilariophyceae   | Thalassionematales | Thalassionemataceae | <i>Thalassionema</i>     |               |
| 101 | Chromista | Ochrophyta      | Mediophyceae        | Cymatosirales      | Cymatosiraceae      |                          |               |
| 102 | Chromista | Ochrophyta      | Mediophyceae        | Hemiaulales        | Hemiaulaceae        | <i>Cerataulina</i>       |               |
| 103 | Chromista | Ochrophyta      | Phaeophyceae        | Dictyotales        | Dictyotaceae        | <i>Lobophora</i>         |               |
| 104 | Chromista | Ochrophyta      |                     | Pinguiochrysidales | Pinguiochrysidaceae | <i>Pinguiochrysis</i>    |               |
| 105 | Fungi     | Ascomycota      | Dothideomycetes     | Capnodiales        | Cladosporiaceae     | <i>Cladosporium</i>      |               |
| 106 | Fungi     | Chytridiomycota |                     |                    |                     |                          |               |
| 107 | Plantae   | Chlorophyta     | Chlorodendrophyceae | Chlorodendrales    | Chlorodendraceae    | <i>Tetraselmis</i>       |               |
| 108 | Plantae   | Chlorophyta     | Chlorophyceae       | Chlamydomonadales  |                     |                          |               |
| 109 | Plantae   | Chlorophyta     | Mamiellophyceae     | Mamiellales        | Bathycoccaceae      | <i>Bathycoccus</i>       |               |
| 110 | Plantae   | Chlorophyta     | Mamiellophyceae     | Mamiellales        | Bathycoccaceae      | <i>Ostreococcus</i>      |               |
| 111 | Plantae   | Chlorophyta     | Mamiellophyceae     | Mamiellales        | Mamiellaceae        | <i>Mamiella</i>          |               |
| 112 | Plantae   | Chlorophyta     | Mamiellophyceae     | Mamiellales        | Mamiellaceae        | <i>Micromonas</i>        |               |
| 113 | Plantae   | Chlorophyta     | Ulvophyceae         | Ulvales            |                     |                          |               |
| 114 | Plantae   | Chlorophyta     |                     | Prasinococcales    |                     | <i>Prasinoderma</i>      |               |
| 115 | Plantae   | Chlorophyta     |                     | Pyramimonadales    |                     | <i>Pyramimonas</i>       |               |
| 116 | Plantae   | Chlorophyta     |                     |                    | Prasinophyceae      |                          |               |
| 117 | Plantae   | Chlorophyta     |                     |                    |                     | <i>Oltmannsiellopsis</i> |               |
| 118 | Plantae   | Glaucophyta     | Glaucozystophyceae  |                    | Cyanophoraceae      | <i>Cyanophora</i>        |               |
| 119 | Plantae   | Streptophyta    |                     | Lamiales           | Acanthaceae         | <i>Lankesteria</i>       |               |
| 120 | Protozoa  | Amoebozoa       |                     | Dactylopodida      | Vexilliferidae      | <i>Neoparamoeba</i>      |               |
| 121 | Protozoa  | Apusozoa        |                     |                    | Planomonadidae      | <i>Planomonas</i>        |               |
| 122 | Protozoa  | Choanozoa       | Choanoflagellata    | Choanoflagellida   | Codonosigidae       | <i>Monosiga</i>          |               |
| 123 | Protozoa  | Choanozoa       | Choanoflagellata    | Choanoflagellida   | Stephanoecidae      | <i>Diaphanoeca</i>       |               |

Supplementary Data 3 - COI (metazoans) taxa

| Count | Kingdom   | Phylum        | Class               | Order                 | Family                 | Genus                     | Species                |
|-------|-----------|---------------|---------------------|-----------------------|------------------------|---------------------------|------------------------|
| 1     | Animalia  | Annelida      | Polychaeta          |                       | Chaetopteridae         | <i>Phyllochaetopterus</i> |                        |
| 2     | Animalia  | Annelida      | Polychaeta          |                       | Dorvilleidae           | <i>Dorvillea</i>          |                        |
| 3     | Animalia  | Annelida      | Polychaeta          |                       | Eunicidae              |                           |                        |
| 4     | Animalia  | Arthropoda    | Malacostraca        | Decapoda              | Xanthidae              | <i>Etisus</i>             |                        |
| 5     | Animalia  | Arthropoda    | Maxillopoda         | Cyclopoida            |                        |                           |                        |
| 6     | Animalia  | Chordata      | Actinopterygii      | Atheriniformes        | Atherinidae            | <i>Atherinomorus</i>      |                        |
| 7     | Animalia  | Chordata      | Actinopterygii      | Atheriniformes        | Atherinidae            | <i>Hypoatherina</i>       |                        |
| 8     | Animalia  | Chordata      | Actinopterygii      | Beloniformes          | Belonidae              | <i>Tylosurus</i>          | <i>gavialoides</i>     |
| 9     | Animalia  | Chordata      | Actinopterygii      | Cluperiformes         | Clupeidae              | <i>Spratelloides</i>      |                        |
| 10    | Animalia  | Chordata      | Actinopterygii      | Mugiliformes          | Mugilidae              | <i>Mugil</i>              | <i>cephalus</i>        |
| 11    | Animalia  | Chordata      | Actinopterygii      | Perciformes           | Carangidae             | <i>Scomberoides</i>       | <i>commersonnianus</i> |
| 12    | Animalia  | Chordata      | Actinopterygii      | Perciformes           | Percidae               | <i>Gerres</i>             |                        |
| 13    | Animalia  | Chordata      | Actinopterygii      | Perciformes           | Labridae               | <i>Chlorurus</i>          | <i>sordidus</i>        |
| 14    | Animalia  | Chordata      | Actinopterygii      | Perciformes           | Labridae               | <i>Coris</i>              | <i>aygula</i>          |
| 15    | Animalia  | Chordata      | Actinopterygii      | Perciformes           | Lethrinidae            | <i>Lethrinus</i>          | <i>nebulosus</i>       |
| 16    | Animalia  | Chordata      | Actinopterygii      | Perciformes           | Pomacentridae          | <i>Dascyllus</i>          | <i>aruanus</i>         |
| 17    | Animalia  | Chordata      | Actinopterygii      | Perciformes           | Pomacentridae          | <i>Pomacentrus</i>        | <i>coelestis</i>       |
| 18    | Animalia  | Chordata      | Actinopterygii      | Perciformes           | Priacanthidae          | <i>Heteropriacanthus</i>  |                        |
| 19    | Animalia  | Chordata      | Actinopterygii      | Perciformes           | Scatophagidae          | <i>Selenotoca</i>         |                        |
| 20    | Animalia  | Chordata      | Actinopterygii      | Tetraodontiformes     | Tetraodontidae         | <i>Arothron</i>           | <i>hispidus</i>        |
| 21    | Animalia  | Chordata      | Ascidiacea          | Enterogona            | Asciidae               | <i>Ascidia</i>            |                        |
| 22    | Animalia  | Chordata      | Chondrichthyes      | Myliobatiformes       | Dasyatidae             | <i>Himantura</i>          | <i>leoparda</i>        |
| 23    | Animalia  | Chordata      | Chondrichthyes      | Myliobatiformes       | Dasyatidae             | <i>Neotrygon</i>          | <i>ningalooensis</i>   |
| 24    | Animalia  | Chordata      | Chondrichthyes      | Myliobatiformes       | Dasyatidae             | <i>Pastinachus</i>        | <i>atrus</i>           |
| 25    | Animalia  | Chordata      | Chondrichthyes      | Myliobatiformes       | Dasyatidae             | <i>Taeniura</i>           |                        |
| 26    | Animalia  | Cnidaria      | Anthozoa            | Alcyonacea            | Alcyoniidae            |                           |                        |
| 27    | Animalia  | Cnidaria      | Anthozoa            | Scleractinia          | Pocilloporidae         | <i>Pocillopora</i>        |                        |
| 28    | Animalia  | Cnidaria      | Hydrozoa            | Leptothecata          | Campanulariidae        | <i>Campanularia</i>       |                        |
| 29    | Animalia  | Cnidaria      | Hydrozoa            | Leptothecata          | Campanulariidae        | <i>Clytia</i>             |                        |
| 30    | Animalia  | Cnidaria      | Hydrozoa            | Leptothecata          | Haleciidae             | <i>Halecium</i>           |                        |
| 31    | Animalia  | Echinodermata | Holothuroidea       | Aspidochirotida       | Holothuridae           | <i>Holothuria</i>         | <i>atra</i>            |
| 32    | Animalia  | Mollusca      | Mollusca            | Bivalvia              | Solemyidae             | <i>Solemya</i>            |                        |
| 33    | Animalia  | Mollusca      | Cephalopoda         | Octopoda              | Octopodidae            | <i>Octopus</i>            | <i>cyanea</i>          |
| 34    | Animalia  | Mollusca      | Gastropoda          | Cerithimorpha         | Cerithidae             | <i>Cerithium</i>          |                        |
| 35    | Animalia  | Mollusca      | Gastropoda          | Hypsogastropoda       | Strombidae             | <i>Strombus</i>           |                        |
| 36    | Animalia  | Mollusca      | Gastropoda          |                       | Littorinidae           | <i>Echinolittorina</i>    |                        |
| 37    | Animalia  | Porifera      | Demospongiae        | Hadromerida           | Clionidae              | <i>Pione</i>              |                        |
| 38    | Animalia  | Porifera      | Demospongiae        | Halichondrida         | Halichondriidae        | <i>Halichondria</i>       |                        |
| 39    | Animalia  | Porifera      | Demospongiae        | Halichondrida         | Halichondriidae        | <i>Hymeniacidon</i>       |                        |
| 40    | Animalia  | Porifera      | Demospongiae        | Haplosclerida         |                        |                           |                        |
| 41    | Animalia  | Porifera      | Demospongiae        | Poecilosclerida       | Desmacellidae          | <i>Biemna</i>             |                        |
| 42    | Animalia  | Porifera      | Demospongiae        | Poecilosclerida       | Microcionidae          | <i>Clathria</i>           |                        |
| 43    | Animalia  | Porifera      | Demospongiae        | Homosclerophorida     | Oscarellidae           | <i>Oscarella</i>          |                        |
| 44    | Chromista | Cercozoa      | Chlorarachnea       | Chlorachniida         | Chlorarachniaceae      | <i>Bigelowiella</i>       |                        |
| 45    | Chromista | Haptophyta    | Coccolithophyceae   | Phaeocystales         | Phaeocystaceae         | <i>Phaeocystis</i>        |                        |
| 46    | Chromista | Haptophyta    | Coccolithophyceae   | Prymnesiales          | Chrysochromulinaceae   | <i>Chrysochromulina</i>   |                        |
| 47    | Chromista | Haptophyta    | Prymnesiophyceae    | Isochrysidales        | Noelaerhabdaceae       | <i>Emiliania</i>          |                        |
| 48    | Chromista | Myzozoa       | Dinophyceae         | Gymnodiniales         | Gymnodiniaceae         | <i>Gymnodinium</i>        |                        |
| 49    | Chromista | Myzozoa       | Dinophyceae         | Syndiniales           | Syndiniaceae           | <i>Hematodinium</i>       |                        |
| 50    | Chromista | Ochrophyta    | Bacillariophyceae   | Bacillariales         | Bacillariaceae         | <i>Cylindrotheca</i>      |                        |
| 51    | Chromista | Ochrophyta    | Bacillariophyceae   | Bacillariales         | Bacillariaceae         | <i>Nitzschia</i>          |                        |
| 52    | Chromista | Ochrophyta    | Bacillariophyceae   | Bacillariales         | Bacillariaceae         | <i>Pseudo-nitzschia</i>   |                        |
| 53    | Chromista | Ochrophyta    | Coscinodiscophyceae | Chaetocerotales       | Chaetocerotaceae       | <i>Chaetoceros</i>        |                        |
| 54    | Chromista | Ochrophyta    | Coscinodiscophyceae | Thalassiosirales      | Skeletonemataceae      | <i>Skeletonema</i>        | <i>menzelli</i>        |
| 55    | Chromista | Ochrophyta    | Coscinodiscophyceae | Thalassiosirales      | Thalassiosiraceae      | <i>Thalassiosira</i>      |                        |
| 56    | Chromista | Ochrophyta    | Mediophyceae        | Cymatosirales         | Cymatosiraceae         | <i>Minutocellus</i>       |                        |
| 57    | Chromista | Ochrophyta    | Mediophyceae        | Thalassiosirales      | Stephanodiscaceae      | <i>Cyclotella</i>         |                        |
| 58    | Chromista | Ochrophyta    | Phaeophyceae        | Dictyotales           | Dictyotaceae           | <i>Dictyota</i>           |                        |
| 59    | Chromista | Ochrophyta    | Phaeophyceae        | Fucales               | Sargassaceae           | <i>Sargassum</i>          | <i>ilicifolium</i>     |
| 60    | Chromista | Ochrophyta    |                     | Ectocarpales          | Chordariaceae          |                           |                        |
| 61    | Chromista | Ochrophyta    |                     | Ectocarpales          | Scytosiphonaceae       | <i>Hydroclathrus</i>      |                        |
| 62    | Fungi     | Ascomycota    | Eurotiomycetes      | Eurotiales            | Trichocomaceae         | <i>Talaromyces</i>        |                        |
| 63    | Plantae   | Chlorophyta   | Prasinophyceae      | Mamiellales           | Mamiellaceae           | <i>Mantoniella</i>        |                        |
| 64    | Plantae   | Chlorophyta   | Prasinophyceae      | Mamiellales           | Mamiellaceae           | <i>Micromonas</i>         |                        |
| 65    | Plantae   | Chlorophyta   | Prasinophyceae      | Pseudoscurfieldiales  | Pycnococcaceae         | <i>Prasinoderma</i>       |                        |
| 66    | Plantae   | Chlorophyta   | Prasinophyceae      | Pseudoscurfieldiales  | Pycnococcaceae         | <i>Pseudoscurfieldia</i>  |                        |
| 67    | Plantae   | Chlorophyta   | Ulvophyceae         | Dasycladales          | Polyphysaceae          | <i>Acetabularia</i>       |                        |
| 68    | Plantae   | Chlorophyta   | Ulvophyceae         | Oltmannsiellopsidales | Oltmannsiellopsidaceae | <i>Oltmannsiellopsis</i>  |                        |
| 69    | Plantae   | Rhodophyta    | Florideophyceae     | Acrochaetiales        | Acrochaetiaceae        | <i>Acrochaetium</i>       |                        |
| 70    | Plantae   | Rhodophyta    | Florideophyceae     | Ceramiales            | Rhodomelaceae          |                           |                        |

|    |          |            |                 |               |                  |                     |
|----|----------|------------|-----------------|---------------|------------------|---------------------|
| 71 | Plantae  | Rhodophyta | Florideophyceae | Corallinales  |                  |                     |
| 72 | Plantae  | Rhodophyta | Florideophyceae | Gigartinales  | Peyssonneliaceae | <i>Sonderopelta</i> |
| 73 | Plantae  | Rhodophyta | Florideophyceae | Gigartinales  | Solieriaceae     |                     |
| 74 | Plantae  | Rhodophyta | Florideophyceae | Rhodymeniales | Rhodymeniaceae   | <i>Coelothrix</i>   |
| 75 | Protozoa | Apusozoa   |                 |               | Apusomonadidae   | <i>Thecamonas</i>   |

**Supplementary Data 3 - Fish 16S taxa**

| Count | Kingdom  | Phylum   | Class          | Order           | Family          | Genus                 | Species                 |
|-------|----------|----------|----------------|-----------------|-----------------|-----------------------|-------------------------|
| 1     | Animalia | Chordata | Actinopterygii | Anguilliformes  | Muraenidae      | <i>Gymnothorax</i>    | <i>pseudothyrsoides</i> |
| 2     | Animalia | Chordata | Actinopterygii | Atheriniformes  | Atherinidae     | <i>Atherinomorus</i>  |                         |
| 3     | Animalia | Chordata | Actinopterygii | Atheriniformes  | Atherinidae     | <i>Hypoatherina</i>   |                         |
| 4     | Animalia | Chordata | Actinopterygii | Beloniformes    | Belonidae       | <i>Strongylura</i>    |                         |
| 5     | Animalia | Chordata | Actinopterygii | Beloniformes    | Hemiramphidae   | <i>Hyporhamphus</i>   |                         |
| 6     | Animalia | Chordata | Actinopterygii | Beryciformes    | Holocentridae   | <i>Sargocentron</i>   | <i>rubrum</i>           |
| 7     | Animalia | Chordata | Actinopterygii | Cluperiformes   | Clupeidae       | <i>Sardinella</i>     |                         |
| 8     | Animalia | Chordata | Actinopterygii | Cluperiformes   | Clupeidae       | <i>Spratelloides</i>  |                         |
| 9     | Animalia | Chordata | Actinopterygii | Cluperiformes   | Engrulidae      | <i>Engraulis</i>      |                         |
| 10    | Animalia | Chordata | Actinopterygii | Mugiliformes    | Mugilidae       | <i>Mugil</i>          | <i>cephalus</i>         |
| 11    | Animalia | Chordata | Actinopterygii | Perciformes     | Acanthuridae    | <i>Acanthurus</i>     | <i>triestegus</i>       |
| 12    | Animalia | Chordata | Actinopterygii | Perciformes     | Apogonidae      | <i>Apogon</i>         |                         |
| 13    | Animalia | Chordata | Actinopterygii | Perciformes     | Blenniidae      | <i>Salarias</i>       |                         |
| 14    | Animalia | Chordata | Actinopterygii | Perciformes     | Carangidae      | <i>Alectis</i>        |                         |
| 15    | Animalia | Chordata | Actinopterygii | Perciformes     | Carangidae      | <i>Caranx</i>         |                         |
| 16    | Animalia | Chordata | Actinopterygii | Perciformes     | Carangidae      | <i>Gnathanodon</i>    | <i>speciosus</i>        |
| 17    | Animalia | Chordata | Actinopterygii | Perciformes     | Carangidae      | <i>Scomberoides</i>   |                         |
| 18    | Animalia | Chordata | Actinopterygii | Perciformes     | Carangidae      | <i>Trachinotus</i>    | <i>blochii</i>          |
| 19    | Animalia | Chordata | Actinopterygii | Perciformes     | Chaetodontidae  | <i>Chaetodon</i>      |                         |
| 20    | Animalia | Chordata | Actinopterygii | Perciformes     | Gerreidae       | <i>Gerres</i>         |                         |
| 21    | Animalia | Chordata | Actinopterygii | Perciformes     | Gobiidae        | <i>Asterropteryx</i>  |                         |
| 22    | Animalia | Chordata | Actinopterygii | Perciformes     | Gobiidae        | <i>Bathygobius</i>    |                         |
| 23    | Animalia | Chordata | Actinopterygii | Perciformes     | Gobiidae        | <i>Gnatholepis</i>    |                         |
| 24    | Animalia | Chordata | Actinopterygii | Perciformes     | Gobiidae        | <i>Gobiodon</i>       | <i>axillaris</i>        |
| 25    | Animalia | Chordata | Actinopterygii | Perciformes     | Haemulidae      | <i>Plectorhinchus</i> |                         |
| 26    | Animalia | Chordata | Actinopterygii | Perciformes     | Kyphosidae      | <i>Kyphosus</i>       | <i>bigibbus</i>         |
| 27    | Animalia | Chordata | Actinopterygii | Perciformes     | Labridae        | <i>Anampses</i>       |                         |
| 28    | Animalia | Chordata | Actinopterygii | Perciformes     | Labridae        | <i>Cheilinus</i>      | <i>trilobatus</i>       |
| 29    | Animalia | Chordata | Actinopterygii | Perciformes     | Labridae        | <i>Cheilio</i>        | <i>inermis</i>          |
| 30    | Animalia | Chordata | Actinopterygii | Perciformes     | Labridae        | <i>Chlorurus</i>      |                         |
| 31    | Animalia | Chordata | Actinopterygii | Perciformes     | Labridae        | <i>Coris</i>          | <i>aygula</i>           |
| 32    | Animalia | Chordata | Actinopterygii | Perciformes     | Labridae        | <i>Cymolutes</i>      |                         |
| 33    | Animalia | Chordata | Actinopterygii | Perciformes     | Labridae        | <i>Halichoeres</i>    | <i>nebulosus</i>        |
| 34    | Animalia | Chordata | Actinopterygii | Perciformes     | Labridae        | <i>Hemigymnus</i>     | <i>melapterus</i>       |
| 35    | Animalia | Chordata | Actinopterygii | Perciformes     | Labridae        | <i>Labrichthys</i>    |                         |
| 36    | Animalia | Chordata | Actinopterygii | Perciformes     | Labridae        | <i>Labroides</i>      | <i>dimidiatus</i>       |
| 37    | Animalia | Chordata | Actinopterygii | Perciformes     | Labridae        | <i>Stethojulis</i>    |                         |
| 38    | Animalia | Chordata | Actinopterygii | Perciformes     | Labridae        | <i>Thalassoma</i>     | <i>lunare</i>           |
| 39    | Animalia | Chordata | Actinopterygii | Perciformes     | Lethrinidae     | <i>Lethrinus</i>      | <i>nebulosus</i>        |
| 40    | Animalia | Chordata | Actinopterygii | Perciformes     | Lutjanidae      | <i>Lutjanus</i>       | <i>fulviflamma</i>      |
| 41    | Animalia | Chordata | Actinopterygii | Perciformes     | Microdesmidae   | <i>Gunnellichthys</i> |                         |
| 42    | Animalia | Chordata | Actinopterygii | Perciformes     | Mullidae        | <i>Parupeneus</i>     |                         |
| 43    | Animalia | Chordata | Actinopterygii | Perciformes     | Pinguipedidae   |                       |                         |
| 44    | Animalia | Chordata | Actinopterygii | Perciformes     | Pomacentridae   | <i>Abudefduf</i>      | <i>vaigiensis</i>       |
| 45    | Animalia | Chordata | Actinopterygii | Perciformes     | Pomacentridae   | <i>Cheiloprion</i>    | <i>labiatus</i>         |
| 46    | Animalia | Chordata | Actinopterygii | Perciformes     | Pomacentridae   | <i>Chromis</i>        | <i>viridis</i>          |
| 47    | Animalia | Chordata | Actinopterygii | Perciformes     | Pomacentridae   | <i>Dascyllus</i>      | <i>aruanus</i>          |
| 48    | Animalia | Chordata | Actinopterygii | Perciformes     | Pomacentridae   | <i>Pomacentrus</i>    | <i>moluccensis</i>      |
| 49    | Animalia | Chordata | Actinopterygii | Perciformes     | Pomacentridae   | <i>Stegastes</i>      | <i>nigricans</i>        |
| 50    | Animalia | Chordata | Actinopterygii | Perciformes     | Pseudochromidae | <i>Pseudochromis</i>  |                         |
| 51    | Animalia | Chordata | Actinopterygii | Perciformes     | Labridae        | <i>Hippocarus</i>     |                         |
| 52    | Animalia | Chordata | Actinopterygii | Perciformes     | Labridae        | <i>Scarus</i>         | <i>schlegeli</i>        |
| 53    | Animalia | Chordata | Actinopterygii | Perciformes     | Scatophagidae   |                       |                         |
| 54    | Animalia | Chordata | Actinopterygii | Perciformes     | Serranidae      | <i>Epinephelus</i>    | <i>quoyanus</i>         |
| 55    | Animalia | Chordata | Actinopterygii | Perciformes     | Siganidae       | <i>Siganus</i>        |                         |
| 56    | Animalia | Chordata | Actinopterygii | Perciformes     | Sillaginidae    | <i>Sillago</i>        |                         |
| 57    | Animalia | Chordata | Actinopterygii | Perciformes     | Sphyraenidae    | <i>Sphyraena</i>      |                         |
| 58    | Animalia | Chordata | Actinopterygii | Scorpaeniformes | Sebastidae      |                       |                         |
| 59    | Animalia | Chordata | Actinopterygii | Syngnathiformes | Fistularidae    | <i>Fistularia</i>     |                         |



|    |          |          |                |                   |                |                     |                  |
|----|----------|----------|----------------|-------------------|----------------|---------------------|------------------|
| 60 | Animalia | Chordata | Actinopterygii | Tetraodontiformes | Balistidae     | <i>Rhinecanthus</i> | <i>aculeatus</i> |
| 61 | Animalia | Chordata | Actinopterygii | Tetraodontiformes | Diodontidae    | <i>Diodon</i>       | <i>hystrix</i>   |
| 62 | Animalia | Chordata | Actinopterygii | Tetraodontiformes | Monacanthidae  | <i>Pervagor</i>     |                  |
| 63 | Animalia | Chordata | Actinopterygii | Tetraodontiformes | Ostraciidae    | <i>Ostracion</i>    | <i>cubicus</i>   |
| 64 | Animalia | Chordata | Actinopterygii | Tetraodontiformes | Tetraodontidae | <i>Arothron</i>     | <i>hispidis</i>  |
| 65 | Animalia | Chordata | Chondrichthyes | Myliobatiformes   | Myliobatidae   | <i>Aetobatus</i>    |                  |

**Supplementary Data 3 - 16S mammals**

| <b>Count</b> | <b>Kingdom</b> | <b>Phylum</b> | <b>Class</b>   | <b>Order</b> | <b>Family</b> | <b>Genus</b>      | <b>Species</b>    |
|--------------|----------------|---------------|----------------|--------------|---------------|-------------------|-------------------|
| 1            | Animalia       | Chordata      | Actinopterygii | Perciformes  | Acanthuridae  | <i>Acanthurus</i> | <i>triestegus</i> |
| 2            | Animalia       | Chordata      | Actinopterygii | Perciformes  | Pomacentridae | <i>Stegastes</i>  | <i>nigricans</i>  |
|              | Animalia       | Chordata      | Mammalia       | Primates     | Hominidae     | <i>Homo</i>       | <i>sapiens</i>    |
| 3            | Animalia       | Chordata      | Mammalia       | Cetacea      | Delphinidae   |                   |                   |
|              | Animalia       | Chordata      | Mammalia       | Artiodactyla | Bovidae       | <i>Bos</i>        |                   |
|              | Animalia       | Chordata      | Mammalia       | Artiodactyla | Suidae        | <i>Sus</i>        | <i>scrofa</i>     |

Supplementary Data 3 - 16S crust

| Count | Kingdom  | Phylum        | Class        | Order         | Family           | Genus                 | Species             |
|-------|----------|---------------|--------------|---------------|------------------|-----------------------|---------------------|
| 1     | Animalia | Annelida      | Polychaeta   |               | Spionidae        |                       |                     |
| 2     | Animalia | Arthropoda    | Insecta      | Blattodea     |                  |                       |                     |
| 3     | Animalia | Arthropoda    | Insecta      | Coleoptera    | Endomychidae     |                       |                     |
| 4     | Animalia | Arthropoda    | Insecta      | Hemiptera     | Cicadellidae     | <i>Opsius</i>         |                     |
| 5     | Animalia | Arthropoda    | Insecta      | Hymenoptera   | Formicidae       | <i>Pheidole</i>       |                     |
| 6     | Animalia | Arthropoda    | Malacostraca | Decapoda      | Alpheidae        | <i>Alpheus</i>        |                     |
| 7     | Animalia | Arthropoda    | Malacostraca | Decapoda      | Axiidae          | <i>Axiopsis</i>       |                     |
| 8     | Animalia | Arthropoda    | Malacostraca | Decapoda      | Callianassidae   |                       |                     |
| 9     | Animalia | Arthropoda    | Malacostraca | Decapoda      | Diogenidae       | <i>Calcinus</i>       | <i>latens</i>       |
| 10    | Animalia | Arthropoda    | Malacostraca | Decapoda      | Diogenidae       | <i>Clibanarius</i>    |                     |
| 11    | Animalia | Arthropoda    | Malacostraca | Decapoda      | Domeciidae       |                       |                     |
| 12    | Animalia | Arthropoda    | Malacostraca | Decapoda      | Dromiidae        |                       |                     |
| 13    | Animalia | Arthropoda    | Malacostraca | Decapoda      | Epialtinae       |                       |                     |
| 14    | Animalia | Arthropoda    | Malacostraca | Decapoda      | Galatheidae      |                       |                     |
| 15    | Animalia | Arthropoda    | Malacostraca | Decapoda      | Grapsidae        | <i>Grapsus</i>        | <i>albolineatus</i> |
| 16    | Animalia | Arthropoda    | Malacostraca | Decapoda      | Grapsidae        | <i>Pachygrapsus</i>   | <i>minutus</i>      |
| 17    | Animalia | Arthropoda    | Malacostraca | Decapoda      | Hippolytidae     | <i>Hippolyte</i>      |                     |
| 18    | Animalia | Arthropoda    | Malacostraca | Decapoda      | Macrophthalmidae | <i>Macrophthalmus</i> |                     |
| 19    | Animalia | Arthropoda    | Malacostraca | Decapoda      | Majidae          | <i>Micippa</i>        | <i>platipes</i>     |
| 20    | Animalia | Arthropoda    | Malacostraca | Decapoda      | Majidae          | <i>Schizophrys</i>    |                     |
| 21    | Animalia | Arthropoda    | Malacostraca | Decapoda      | Majidae          | <i>Tiarinia</i>       |                     |
| 22    | Animalia | Arthropoda    | Malacostraca | Decapoda      | Matutoidea       | <i>Ashtoret</i>       |                     |
| 23    | Animalia | Arthropoda    | Malacostraca | Decapoda      | Munididae        |                       |                     |
| 24    | Animalia | Arthropoda    | Malacostraca | Decapoda      | Palaemonidae     | <i>Coralliocaris</i>  |                     |
| 25    | Animalia | Arthropoda    | Malacostraca | Decapoda      | Penaeidae        | <i>Melicertus</i>     |                     |
| 26    | Animalia | Arthropoda    | Malacostraca | Decapoda      | Percnidae        | <i>Percnon</i>        |                     |
| 27    | Animalia | Arthropoda    | Malacostraca | Decapoda      | Pilumnidae       |                       |                     |
| 28    | Animalia | Arthropoda    | Malacostraca | Decapoda      | Portunidae       | <i>Carupa</i>         |                     |
| 29    | Animalia | Arthropoda    | Malacostraca | Decapoda      | Portunidae       | <i>Charybdis</i>      |                     |
| 30    | Animalia | Arthropoda    | Malacostraca | Decapoda      | Portunidae       | <i>Libystes</i>       |                     |
| 31    | Animalia | Arthropoda    | Malacostraca | Decapoda      | Portunidae       | <i>Portunus</i>       | <i>pelagicus</i>    |
| 32    | Animalia | Arthropoda    | Malacostraca | Decapoda      | Portunidae       | <i>Thalamita</i>      | <i>admete</i>       |
| 33    | Animalia | Arthropoda    | Malacostraca | Decapoda      | Tetraliidae      | <i>Tetralia</i>       |                     |
| 34    | Animalia | Arthropoda    | Malacostraca | Decapoda      | Trapeziidae      | <i>Trapezia</i>       |                     |
| 35    | Animalia | Arthropoda    | Malacostraca | Decapoda      | Varunidae        |                       |                     |
| 36    | Animalia | Arthropoda    | Malacostraca | Decapoda      | Xanthidae        | <i>Atergatis</i>      |                     |
| 37    | Animalia | Arthropoda    | Malacostraca | Decapoda      | Xanthidae        | <i>Chlorodiella</i>   | <i>laevisima</i>    |
| 38    | Animalia | Arthropoda    | Malacostraca | Decapoda      | Xanthidae        | <i>Cyclodius</i>      |                     |
| 39    | Animalia | Arthropoda    | Malacostraca | Decapoda      | Xanthidae        | <i>Etisus</i>         |                     |
| 40    | Animalia | Arthropoda    | Malacostraca | Decapoda      | Xanthidae        | <i>Liocarpilodes</i>  |                     |
| 41    | Animalia | Arthropoda    | Malacostraca | Decapoda      | Xanthidae        | <i>Liomera</i>        |                     |
| 42    | Animalia | Arthropoda    | Malacostraca | Decapoda      | Xanthidae        | <i>Macromedaeus</i>   |                     |
| 43    | Animalia | Arthropoda    | Malacostraca | Decapoda      | Xanthidae        | <i>Paraxanthias</i>   |                     |
| 44    | Animalia | Arthropoda    | Malacostraca | Decapoda      | Xanthidae        | <i>Pilodius</i>       | <i>areolatus</i>    |
| 45    | Animalia | Arthropoda    | Malacostraca | Decapoda      | Xanthidae        | <i>Psaumis</i>        |                     |
| 46    | Animalia | Arthropoda    | Malacostraca | Stromatopoda  | Nannosquillidae  | <i>Pullosquilla</i>   |                     |
| 47    | Animalia | Arthropoda    | Maxillopoda  | Lithoglyptida | Lithoglyptidae   | <i>Auritoglyptes</i>  |                     |
| 48    | Animalia | Bryozoa       | Gymnolaemata | Cheilostomata | Beaniidae        |                       |                     |
| 49    | Animalia | Bryozoa       | Gymnolaemata | Cheilostomata | Bictectiporidae  |                       |                     |
| 50    | Animalia | Bryozoa       | Gymnolaemata | Cheilostomata | Smittinidae      |                       |                     |
| 51    | Animalia | Cnidaria      | Hydrozoa     | Leptothecata  | Plumulariidae    | <i>Plumularia</i>     |                     |
| 52    | Animalia | Echinodermata | Ophiuroidea  | Ophiurida     | Amphiuridae      | <i>Amphipholis</i>    |                     |
| 53    | Animalia | Echinodermata | Ophiuroidea  | Ophiurida     | Ophiocomidae     | <i>Ophiocoma</i>      |                     |

**Supplementary Data 3 - 16S Ceph**

| Count | Kingdom  | Phylum        | Class       | Order           | Family          | Genus                       | Species               |
|-------|----------|---------------|-------------|-----------------|-----------------|-----------------------------|-----------------------|
| 1     | Animalia | Arthropoda    | Insecta     | Coleoptera      |                 |                             |                       |
| 2     | Animalia | Arthropoda    | Insecta     | Orthoptera      | Acrididae       |                             |                       |
| 3     | Animalia | Echinodermata | Ophiuroidea | Ophiurida       | Ophiothrichidae | <i>Macrophiothrix</i>       | <i>caenosa</i>        |
| 4     | Animalia | Mollusca      | Bivalvia    | Solemyoida      | Solemyidae      | <i>Solemya</i>              |                       |
| 5     | Animalia | Mollusca      | Cephalopoda | Octopoda        | Octopodidae     | <i>Abdopus</i>              |                       |
| 6     | Animalia | Mollusca      | Cephalopoda | Octopoda        | Octopodidae     | <i>Octopus</i>              | <i>cyanea</i>         |
| 7     | Animalia | Mollusca      | Cephalopoda | Teuthida        | Loliginidae     | <i>Sepioteuthis</i>         |                       |
| 8     | Animalia | Mollusca      | Gastropoda  | Caenogastropoda | Cerithiidae     | <i>Cerithium</i>            | <i>atromarginatum</i> |
| 9     | Animalia | Mollusca      | Gastropoda  | Caenogastropoda | Cerithiidae     | <i>Cerithium</i>            | <i>rostratum</i>      |
| 10    | Animalia | Mollusca      | Gastropoda  | Caenogastropoda | Cerithiidae     | <i>Clypeomorus</i>          |                       |
| 11    | Animalia | Mollusca      | Gastropoda  | Caenogastropoda | Litiopidae      | <i>Alaba</i>                |                       |
| 12    | Animalia | Mollusca      | Gastropoda  | Caenogastropoda | Turritellidae   |                             |                       |
| 13    | Animalia | Mollusca      | Gastropoda  | Nudipleura      |                 |                             |                       |
| 14    | Animalia | Mollusca      | Gastropoda  | Vetigastropoda  | Haliotidae      | <i>Haliotis</i>             | <i>asinina</i>        |
| 15    | Animalia | Mollusca      | Gastropoda  | Vetigastropoda  | Trochidae       | <i>Pseudostomatella</i>     |                       |
| 16    | Animalia | Mollusca      | Gastropoda  | Vetigastropoda  | Trochidae       | <i>Rossiteria</i>           |                       |
| 17    | Animalia | Mollusca      | Gastropoda  | Vetigastropoda  | Trochidae       | <i>Stomatella</i>           | <i>impertusa</i>      |
| 18    | Animalia | Mollusca      | Gastropoda  | Vetigastropoda  | Trochidae       | <i>Stomatia</i>             |                       |
| 19    | Animalia | Mollusca      | Gastropoda  | Vetigastropoda  | Turbinidae      | <i>Turbo (Marmarostoma)</i> |                       |

**Supplementary Data 3 - 23S**

| <b>Count</b> | <b>Kingdom</b> | <b>Phylum</b> | <b>Class</b> | <b>Order</b> | <b>Family</b>   | <b>Genus</b>        | <b>Species</b> |
|--------------|----------------|---------------|--------------|--------------|-----------------|---------------------|----------------|
| 1            | Chromista      | Myzozoa       | Dinophyceae  | Suessiales   | Symbiodiniaceae | <i>Symbiodinium</i> | clade D        |
| 2            | Chromista      | Myzozoa       | Dinophyceae  | Suessiales   | Symbiodiniaceae | <i>Symbiodinium</i> | clade B        |
| 3            | Chromista      | Myzozoa       | Dinophyceae  | Suessiales   | Symbiodiniaceae | <i>Symbiodinium</i> | clade A        |
| 4            | Chromista      | Myzozoa       | Dinophyceae  | Suessiales   | Symbiodiniaceae | <i>Symbiodinium</i> | clade C        |
| 5            | Chromista      | Myzozoa       | Dinophyceae  | Suessiales   | Symbiodiniaceae | <i>Symbiodinium</i> | clade G        |
| 6            | Chromista      | Myzozoa       | Dinophyceae  | Suessiales   | Symbiodiniaceae | <i>Symbiodinium</i> | clade H        |
| 7            | Chromista      | Myzozoa       | Dinophyceae  | Suessiales   | Symbiodiniaceae | <i>Symbiodinium</i> | clade F        |

**Supplementary Data 3 - trnL**

| <b>Count</b> | <b>Kingdom</b> | <b>Phylum</b> | <b>Class</b>  | <b>Order</b>   | <b>Family</b> | <b>Genus</b> | <b>Species</b> |
|--------------|----------------|---------------|---------------|----------------|---------------|--------------|----------------|
| 1            | Plantae        | Streptophyta  | Equisetopsida | Apiales        | Apiaceae      |              |                |
| 2            | Plantae        | Streptophyta  | Equisetopsida | Asterales      | Asteraceae    |              |                |
| 3            | Plantae        | Streptophyta  | Equisetopsida | Solanales      | Solanaceae    |              |                |
| 4            | Plantae        | Streptophyta  | Equisetopsida | Caryophyllales | Amaranthaceae |              |                |
| 5            | Plantae        | Streptophyta  | Equisetopsida | Cucurbitales   | Cucurbitaceae |              |                |
| 6            | Plantae        | Streptophyta  | Equisetopsida | Fabales        | Fabaceae      |              |                |
| 7            | Plantae        | Streptophyta  | Equisetopsida | Brassicales    | Caricaceae    |              |                |
| 8            | Plantae        | Streptophyta  | Equisetopsida | Sapindales     | Rutaceae      |              |                |
| 9            | Plantae        | Streptophyta  | Equisetopsida | Poales         | Poaceae       |              |                |
| 10           | Plantae        | Streptophyta  |               | Magnoliales    | Magnoliaceae  |              |                |

Supplementary Data 3- Prokaryotes

OTUNumber Abundance repSeqName

|         |       |                                   |
|---------|-------|-----------------------------------|
| Otu0001 | 45176 | FTP55_1101_18143_2721_(reversed)  |
| Otu0002 | 71923 | FTP55_1101_15943_2366_(reversed)  |
| Otu0003 | 9803  | FTP55_1101_20199_2810_(reversed)  |
| Otu0004 | 78361 | FTP55_1101_15313_2070_(reversed)  |
| Otu0005 | 49244 | FTP55_1101_15278_2260_(reversed)  |
| Otu0006 | 3651  | FTP55_1101_18449_2881_(reversed)  |
| Otu0007 | 5899  | FTP55_1101_16830_3031_(reversed)  |
| Otu0008 | 10179 | FTP55_1101_13057_2056_(reversed)  |
| Otu0009 | 7759  | FTP55_1101_19067_2743_(reversed)  |
| Otu0010 | 1725  | FTP55_1101_14639_2893_(reversed)  |
| Otu0011 | 10018 | FTP55_1101_16825_2291_(reversed)  |
| Otu0012 | 2173  | FTP55_1101_19270_12716_(reversed) |
| Otu0013 | 4993  | FTP55_1101_18280_2152_(reversed)  |
| Otu0014 | 2705  | FTP55_1101_14645_3152_(reversed)  |
| Otu0015 | 1613  | FTP55_1101_14773_3284_(reversed)  |
| Otu0016 | 442   | FTP55_1102_12013_9321_(reversed)  |
| Otu0017 | 2039  | FTP55_1101_19339_4436_(reversed)  |
| Otu0018 | 1696  | FTP55_1101_7183_6749_(reversed)   |
| Otu0019 | 3846  | FTP55_1101_13990_4046_(reversed)  |
| Otu0020 | 5755  | FTP55_1101_17029_2092_(reversed)  |
| Otu0021 | 455   | FTP55_1101_18350_4332_(reversed)  |
| Otu0022 | 773   | FTP55_1101_16825_2291_(reversed)  |
| Otu0023 | 970   | FTP55_1101_7148_7390_(reversed)   |
| Otu0024 | 2836  | FTP55_1101_17847_3091_(reversed)  |
| Otu0025 | 268   | FTP55_1101_17482_4815_(reversed)  |
| Otu0026 | 1070  | FTP55_1101_11759_10918_(reversed) |
| Otu0027 | 1095  | FTP55_1101_10957_2864_(reversed)  |
| Otu0028 | 320   | FTP55_1101_8969_7680_(reversed)   |
| Otu0029 | 665   | FTP55_1101_14997_5128_(reversed)  |
| Otu0030 | 539   | FTP55_1101_18102_2100_(reversed)  |
| Otu0031 | 472   | FTP55_1101_12206_11773_(reversed) |
| Otu0032 | 1805  | FTP55_1101_20734_2687_(reversed)  |
| Otu0033 | 112   | FTP55_1101_12343_16976_(reversed) |
| Otu0034 | 290   | FTP55_1101_24371_5736_(reversed)  |
| Otu0035 | 146   | FTP55_1101_22828_20866_(reversed) |
| Otu0036 | 243   | FTP55_1101_13226_2190_(reversed)  |
| Otu0037 | 1321  | FTP55_1101_20381_2581_(reversed)  |
| Otu0038 | 486   | FTP55_1101_17857_2193_(reversed)  |
| Otu0039 | 558   | FTP55_1101_19029_5863_(reversed)  |
| Otu0040 | 62    | FTP55_101_16092_21768_(reversed)  |
| Otu0041 | 60    | FTP55_1102_22354_3149_(reversed)  |
| Otu0042 | 137   | FTP55_1101_10624_13132_(reversed) |
| Otu0043 | 181   | FTP55_1101_7711_22958_(reversed)  |
| Otu0044 | 46    | FTP55_1101_7196_6519_(reversed)   |
| Otu0045 | 146   | FTP55_1101_11742_6851_(reversed)  |
| Otu0046 | 41    | FTP55_1101_12083_4107_(reversed)  |
| Otu0047 | 120   | FTP55_1101_19565_8985_(reversed)  |
| Otu0048 | 412   | FTP55_1101_19863_3266_(reversed)  |
| Otu0049 | 122   | FTP55_1101_20864_5559_(reversed)  |
| Otu0050 | 301   | FTP55_1101_13796_10812_(reversed) |
| Otu0051 | 280   | FTP55_1101_14953_2931_(reversed)  |
| Otu0052 | 111   | FTP55_1101_7343_14096_(reversed)  |
| Otu0053 | 19    | FTP55_1102_16432_10746_(reversed) |
| Otu0054 | 149   | FTP55_1101_26237_6683_(reversed)  |
| Otu0055 | 36    | FTP55_1102_26983_14194_(reversed) |
| Otu0056 | 136   | FTP55_1101_15849_22487_(reversed) |
| Otu0057 | 276   | FTP55_1102_9026_5189_(reversed)   |
| Otu0058 | 61    | FTP55_1101_11615_4337_(reversed)  |
| Otu0059 | 665   | FTP55_1101_19249_3601_(reversed)  |
| Otu0060 | 209   | FTP55_1101_8153_5341_(reversed)   |
| Otu0061 | 246   | FTP55_1101_9699_4837_(reversed)   |
| Otu0062 | 16    | FTP55_1101_14720_15125_(reversed) |
| Otu0063 | 172   | FTP55_1101_21891_7504_(reversed)  |
| Otu0064 | 32    | FTP55_1101_22614_13572_(reversed) |
| Otu0065 | 531   | FTP55_1101_8706_7471_(reversed)   |
| Otu0066 | 45    | FTP55_1101_13949_11758_(reversed) |
| Otu0067 | 99    | FTP55_1101_11896_9451_(reversed)  |
| Otu0068 | 48    | FTP55_1101_14424_13462_(reversed) |
| Otu0069 | 229   | FTP55_1102_9475_7254_(reversed)   |
| Otu0070 | 227   | FTP55_1101_6010_8191_(reversed)   |
| Otu0071 | 124   | FTP55_1102_22889_8475_(reversed)  |
| Otu0072 | 264   | FTP55_1101_16060_7148_(reversed)  |
| Otu0073 | 15    | FTP55_101_5848_10463_(reversed)   |
| Otu0074 | 21    | FTP55_1101_6035_14848_(reversed)  |
| Otu0075 | 70    | FTP55_1101_11070_7908_(reversed)  |
| Otu0076 | 11    | FTP55_1101_18300_12813_(reversed) |
| Otu0077 | 32    | FTP55_1102_11988_11769_(reversed) |
| Otu0078 | 421   | FTP55_1101_10018_16676_(reversed) |
| Otu0079 | 58    | FTP55_1101_18997_11221_(reversed) |
| Otu0080 | 14    | FTP55_101_25528_15080_(reversed)  |
| Otu0081 | 30    | FTP55_1101_23159_11265_(reversed) |
| Otu0082 | 347   | FTP55_1101_13929_3769_(reversed)  |
| Otu0083 | 14    | FTP55_1102_3799_16980_(reversed)  |
| Otu0084 | 172   | FTP55_1101_7545_38495_(reversed)  |
| Otu0085 | 225   | FTP55_1101_3322_9337_(reversed)   |
| Otu0086 | 10    | FTP55_1101_5523_8568_(reversed)   |
| Otu0087 | 11    | FTP55_1101_23232_10702_(reversed) |
| Otu0088 | 89    | FTP55_1101_7444_6550_(reversed)   |
| Otu0089 | 89    | FTP55_1101_18890_10489_(reversed) |
| Otu0090 | 46    | FTP55_1101_8205_7104_(reversed)   |
| Otu0091 | 9     | FTP55_1102_14870_10287_(reversed) |
| Otu0092 | 66    | FTP55_1101_13037_14463_(reversed) |
| Otu0093 | 33    | FTP55_101_18907_24776_(reversed)  |
| Otu0094 | 101   | FTP55_1101_17571_9900_(reversed)  |
| Otu0095 | 6     | FTP55_1101_3567_12996_(reversed)  |
| Otu0096 | 21    | FTP55_1101_16630_10704_(reversed) |
| Otu0097 | 31    | FTP55_1102_20056_6998_(reversed)  |
| Otu0098 | 649   | FTP55_1102_15845_10475_(reversed) |
| Otu0099 | 89    | FTP55_1101_17586_5606_(reversed)  |
| Otu0100 | 12    | FTP55_1101_12589_5806_(reversed)  |
| Otu0101 | 24    | FTP55_1101_13004_9954_(reversed)  |
| Otu0102 | 142   | FTP55_1101_18728_5094_(reversed)  |
| Otu0103 | 7     | FTP55_1101_15088_21233_(reversed) |
| Otu0104 | 10    | FTP55_1101_17649_16220_(reversed) |
| Otu0105 | 56    | FTP55_1101_22693_7333_(reversed)  |
| Otu0106 | 9     | FTP55_1101_22614_21082_(reversed) |

OTUConTaxonomy

|                                                                                                                                 |
|---------------------------------------------------------------------------------------------------------------------------------|
| Bacteria(100);Proteobacteria(100);Alphaproteobacteria(100);unclassified(55);unclassified(55);                                   |
| Bacteria(100);Proteobacteria(100);Alphaproteobacteria(100);Rhodobacterales(100);Rhodobacteraceae(100);unclassified(100);        |
| Bacteria(100);Proteobacteria(100);Gammaproteobacteria(100);Vibrionales(100);Vibrionaceae(100);unclassified(72);                 |
| Bacteria(100);Bacteroidetes(100);Flavobacteria(100);Flavobacteriales(100);Cryomorphaceae(100);Owenweekia(100);                  |
| Bacteria(100);Proteobacteria(100);Gammaproteobacteria(100);Oceanospirillales(100);Litoricolaceae(100);Litoricola(100);          |
| Bacteria(100);Proteobacteria(100);Alphaproteobacteria(100);Rickettsiales(99);SAR116_clade(99);unclassified(99);                 |
| Bacteria(100);Proteobacteria(100);Alphaproteobacteria(100);Rickettsiales(100);SAR116_clade(100);unclassified(100);              |
| Bacteria(100);Proteobacteria(100);Gammaproteobacteria(100);Alteromonadales(100);Alteromonadaceae(100);Alteromonas(89);          |
| Bacteria(100);Bacteroidetes(100);Flavobacteria(100);Flavobacteriales(100);Flavobacteriaceae(100);NS5_marine_group(100);         |
| Bacteria(100);Bacteroidetes(100);Flavobacteria(100);Flavobacteriales(100);Flavobacteriaceae(100);NS5_marine_group(100);         |
| Bacteria(100);Proteobacteria(100);Gammaproteobacteria(100);Oceanospirillales(100);SAR86_clade(100);unclassified(100);           |
| Bacteria(100);Proteobacteria(100);Alphaproteobacteria(100);Rickettsiales(100);SAR116_clade(100);unclassified(100);              |
| Bacteria(100);Bacteroidetes(100);Flavobacteria(100);Flavobacteriales(100);Flavobacteriaceae(100);NS5_marine_group(99);          |
| Bacteria(100);Bacteroidetes(100);Flavobacteria(100);Flavobacteriales(100);Flavobacteriaceae(100);NS5_marine_group(100);         |
| Bacteria(100);Proteobacteria(100);Gammaproteobacteria(100);Oceanospirillales(100);Oceanospirillaceae(100);Oleibacter(99);       |
| Bacteria(100);Proteobacteria(100);Alphaproteobacteria(100);Rhodobacterales(100);Rhodobacteraceae(100);unclassified(71);         |
| Bacteria(100);Proteobacteria(100);Alphaproteobacteria(100);OC116_clade(100);unclassified(100);unclassified(100);                |
| Bacteria(100);Proteobacteria(100);Gammaproteobacteria(100);Oceanospirillales(100);Oceanospirillaceae(100);Oleibacter(99);       |
| Bacteria(100);Bacteroidetes(100);Flavobacteria(100);Flavobacteriales(100);NS9_marine_group(100);unclassified(100);              |
| Bacteria(100);Proteobacteria(100);Alphaproteobacteria(100);unclassified(61);unclassified(61);unclassified(61);                  |
| Bacteria(100);Proteobacteria(100);Alphaproteobacteria(100);Rickettsiales(100);SAR116_clade(100);unclassified(100);              |
| Archaea(100);Euryarchaeota(100);Thermoplasmata(100);Thermoplasmatales(100);Marine_Group_II(100);unclassified(100);              |
| Bacteria(100);Proteobacteria(100);Gammaproteobacteria(100);Cellvibrionales(100);Halleaceae(100);OM60(NORS)_clade(100);          |
| Bacteria(100);Proteobacteria(100);Gammaproteobacteria(100);Oceanospirillales(100);Oleiphilaceae(98);Oleiphilus(98);             |
| Bacteria(100);Bacteroidetes(100);Flavobacteria(100);Flavobacteriales(100);NS9_marine_group(100);unclassified(100);              |
| Bacteria(100);Bacteroidetes(100);Flavobacteria(100);Flavobacteriales(100);Flavobacteriaceae(100);NS4_marine_group(98);          |
| Bacteria(100);Proteobacteria(100);Alphaproteobacteria(100);Rhodobacterales(100);Rhodobacteraceae(100);unclassified(99);         |
| Bacteria(100);Bacteroidetes(100);Flavobacteria(100);Flavobacteriales(100);NS9_marine_group(93);unclassified(93);                |
| Bacteria(100);Proteobacteria(100);Alphaproteobacteria(100);Rickettsiales(100);SAR116_clade(100);Candidatus_Puncicepirillum(83); |
| Bacteria(100);Proteobacteria(100);Alphaproteobacteria(100);Rickettsiales(100);SAR116_clade(100);unclassified(100);              |
| Bacteria(100);Bacteroidetes(100);Flavobacteria(100);Flavobacteriales(100);Flavobacteriaceae(100);Formosa(99);                   |
| Bacteria(100);Proteobacteria(100);Alphaproteobacteria(100);Rickettsiales(100);SAR116_clade(100);unclassified(100);              |
| Bacteria(100);Proteobacteria(100);Alphaproteobacteria(100);unclassified(63);unclassified(63);unclassified(63);                  |
| Bacteria(100);Proteobacteria(100);Alphaproteobacteria(100);Rickettsiales(100);SAR116_clade(100);unclassified(100);              |
| Bacteria(100);Proteobacteria(100);Gammaproteobacteria(100);Cellvibrionales(100);Halleaceae(100);OM60(NORS)_clade(100);          |
| Bacteria(100);Proteobacteria(100);Alphaproteobacteria(100);Oceanospirillales(100);Litoricolaceae(100);Litoricola(100);          |
| Bacteria(100);Proteobacteria(100);Alphaproteobacteria(100);Rhodobacterales(100);Rhodobacteraceae(100);unclassified(100);        |
| Bacteria(100);Bacteroidetes(100);Flavobacteria(100);Flavobacteriales(100);Flavobacteriaceae(100);NS5_marine_group(99);          |
| Bacteria(100);Proteobacteria(100);Alphaproteobacteria(100);Rickettsiales(100);SAR116_clade(100);unclassified(100);              |
| Bacteria(100);Proteobacteria(100);Alphaproteobacteria(100);Rhodobacterales(100);Rhodobacteraceae(100);unclassified(95);         |
| Bacteria(100);Proteobacteria(100);Gammaproteobacteria(100);Vibrionales(99);Vibrionaceae(99);unclassified(95);                   |
| Bacteria(100);Proteobacteria(100);Alphaproteobacteria(100);Rhodobacterales(100);Rhodobacteraceae(100);Shimia(80);               |
| Bacteria(100);Proteobacteria(100);Gammaproteobacteria(100);Vibrionales(100);Vibrionaceae(100);Photobacterium(96);               |
| Bacteria(100);Bacteroidetes(100);Flavobacteria(100);Flavobacteriales(100);Flavobacteriaceae(100);NS5_marine_group(100);         |
| Bacteria(100);Bacteroidetes(100);Flavobacteria(100);Flavobacteriales(100);Flavobacteriaceae(100);NS5_marine_group(100);         |
| Bacteria(100);Proteobacteria(100);Alphaproteobacteria(100);Oceanospirillales(100);SAR86_clade(100);unclassified(100);           |
| Bacteria(100);Bacteroidetes(100);Flavobacteria(100);Flavobacteriales(100);NS9_marine_group(100);unclassified(100);              |
| Bacteria(100);Bacteroidetes(100);Flavobacteria(100);Flavobacteriales(100);Flavobacteriaceae(100);NS2b_marine_group(100);        |
| Bacteria(100);Proteobacteria(100);Alphaproteobacteria(100);Rickettsiales(100);SAR116_clade(100);unclassified(100);              |
| Bacteria(100);Bacteroidetes(100);Flavobacteria(100);Flavobacteriales(100);Flavobacteriaceae(100);NS5_marine_group(100);         |
| Bacteria(100);Proteobacteria(100);Alphaproteobacteria(100);unclassified(68);unclassified(68);unclassified(68);                  |
| Bacteria(100);Proteobacteria(100);Alphaproteobacteria(100);Rickettsiales(100);SAR116_clade(100);unclassified(100);              |
| Bacteria(100);Proteobacteria(100);Epsilonproteobacteria(100);Campylobacteriales(100);Campylobacteraceae(100);Arcobacter(100);   |
| Bacteria(100);Bacteroidetes(100);Flavobacteria(100);Flavobacteriales(100);Cryomorphaceae(75);Owenweekia(75);                    |
| Bacteria(100);Bacteroidetes(100);Flavobacteria(100);Flavobacteriales(100);Flavobacteriaceae(100);unclassified(100);             |
| Bacteria(100);Proteobacteria(100);Gammaproteobacteria(100);Oceanospirillales(100);Oceanospirillaceae(100);Thalassolituus(100);  |
| Bacteria(100);Proteobacteria(100);Epsilonproteobacteria(100);Campylobacteriales(100);Campylobacteraceae(100);Arcobacter(100);   |
| Archaea(100);Euryarchaeota(100);Thermoplasmata(100);Thermoplasmatales(99);Rhodobacteraceae(99);unclassified(99);                |
| Bacteria(100);Proteobacteria(100);Alphaproteobacteria(100);unclassified(91);unclassified(91);unclassified(91);                  |
| Bacteria(100);Bacteroidetes(100);Flavobacteria(100);Flavobacteriales(100);Flavobacteriaceae(100);NS4_marine_group(100);         |
| Bacteria(100);Tenericutes(100);Mollicutes(100);NB1-n(100);unclassified(100);unclassified(100);                                  |
| Bacteria(100);Proteobacteria(100);Alphaproteobacteria(100);OC116_clade(100);unclassified(100);unclassified(100);                |
| Bacteria(100);Proteobacteria(100);Gammaproteobacteria(100);Cellvibrionales(100);Spongiibacteraceae(100);Spongiibacter(100);     |
| Bacteria(100);Proteobacteria(100);Gammaproteobacteria(100);Alteromonadales(100);Alteromonadaceae(100);Aestuariaibacter(100);    |
| Bacteria(100);Proteobacteria(100);Alphaproteobacteria(100);Rickettsiales(100);SAR116_clade(100);unclassified(100);              |
| Bacteria(100);Proteobacteria(100);Gammaproteobacteria(100);Vibrionales(100);Vibrionaceae(100);Enterovibrio(70);                 |
| Bacteria(100);Bacteroidetes(100);Flavobacteria(100);Flavobacteriales(100);Flavobacteriaceae(100);NS5_marine_group(100);         |
| Bacteria(100);Bacteroidetes(100);Flavobacteria(100);Flavobacteriales(100);Flavobacteriaceae(100);NS5_marine_group(100);         |
| Bacteria(100);Proteobacteria(100);Alphaproteobacteria(100);Alteromonadales(99);Colwelliaceae(99);unclassified(99);              |
| Bacteria(100);Proteobacteria(100);Alphaproteobacteria(100);unclassified(96);unclassified(96);unclassified(96);                  |
| Bacteria(100);Proteobacteria(100);Gammaproteobacteria(100);Oceanospirillales(100);Oceanospirillaceae(100);Marinomonas(100);     |
| Bacteria(100);Proteobacteria(100);Gammaproteobacteria(100);Oceanospirillales(100);Halleaceae(100);Endozoicomonas(100);          |
| Archaea(100);Euryarchaeota(100);Thermoplasmata(100);Thermoplasmatales(100);Marine_Group_II(100);unclassified(100);              |
| Bacteria(100);Proteobacteria(100);Gammaproteobacteria(100);Cellvibrionales(100);Porticocaceae(100);SAR92_clade(100);            |
| Bacteria(100);Proteobacteria(100);Gammaproteobacteria(100);Vibrionales(100);Vibrionaceae(100);Vibrio(90);                       |
| Bacteria(100);Proteobacteria(100);Alphaproteobacteria(100);Rhodobacterales(100);Rhodobacteraceae(100);unclassified(100);        |
| Bacteria(100);Proteobacteria(100);Epsilonproteobacteria(100);Campylobacteriales(100);Campylobacteraceae(100);Arcobacter(100);   |
| Bacteria(100);Proteobacteria(100);Epsilonproteobacteria(100);Campylobacteriales(100);Helicobacteraceae(100);Sulfurovum(100);    |
| Bacteria(100);Proteobacteria(100);Epsilonproteobacteria(100);Campylobacteriales(100);Campylobacteraceae(100);Arcobacter(100);   |
| Bacteria(100);Proteobacteria(100);Gammaproteobacteria(100);Alteromonadales(100);Alteromonadaceae(100);Agaribacter(67);          |
| Bacteria(100);Proteobacteria(100);Gammaproteobacteria(100);Oceanospirillales(100);Oceanospirillaceae(100);Amphritea(100);       |
| Bacteria(100);Proteobacteria(100);Alphaproteobacteria(100);Rhodobacterales(100);Rhodobacteraceae(100);unclassified(67);         |
| Bacteria(100);Proteobacteria(100);Gammaproteobacteria(100);Oceanospirillales(100);SAR86_clade(100);unclassified(100);           |
| Bacteria(100);Proteobacteria(100);Alphaproteobacteria(100);Vibrionales(100);Vibrionaceae(100);Photobacterium(100);              |
| Bacteria(100);Proteobacteria(100);Gammaproteobacteria(100);Oceanospirillales(100);Oceanospirillaceae(100);Reinekea(100);        |
| Bacteria(100);Proteobacteria(100);Alphaproteobacteria(100);Oceanospirillales(100);Oceanospirillaceae(100);Pseudospirillum(100); |
| Bacteria(100);Proteobacteria(100);Alphaproteobacteria(100);Rhodobacterales(100);Rhodobacteraceae(100);unclassified(100);        |
| Bacteria(100);Proteobacteria(100);Alphaproteobacteria(100);Rhodobacterales(100);Rhodobacteraceae(100);unclassified(100);        |
| Bacteria(100);Proteobacteria(100);Epsilonproteobacteria(100);Campylobacteriales(100);Campylobacteraceae(100);Arcobacter(100);   |
| Bacteria(100);Proteobacteria(100);unclassified(100);unclassified(100);unclassified(100);                                        |

Otu0107 398 FTp55\_1101\_17595\_4676\_(reversed) Bacteria(100);Proteobacteria(100);Alphaproteobacteria(100);SAR11\_clade(100);Surface\_1(100);Candidatus\_Pelagibacter(95);  
Otu0108 23 FTp55\_1101\_10033\_10702\_(reversed) Bacteria(100);Proteobacteria(100);Alphaproteobacteria(100);Rhodobacterales(100);Rhodobacteraceae(100);unclassified(100);  
Otu0109 44 FTp55\_1102\_10557\_4973\_(reversed) Bacteria(100);Proteobacteria(100);Betaproteobacteria(100);Methylophilales(100);Methylophilaceae(100);OM43\_clade(100);  
Otu0110 80 FTp55\_1101\_14323\_8062\_(reversed) Bacteria(100);Proteobacteria(100);Gammmaproteobacteria(100);Order\_Incertae\_Sedis(100);Family\_Incertae\_Sedis(100);Marinicella(100);  
Otu0111 16 FTp55\_1101\_16222\_6026\_(reversed) Bacteria(100);Tenericutes(100);Mollicutes(100);NB1-n(100);unclassified(100);unclassified(100);  
Otu0112 7 FTp55\_1101\_9951\_9189\_(reversed) Bacteria(100);Bacteroidetes(100);Flavobacteria(100);Flavobacteriales(100);Cryomorphaceae(100);Owenweeksia(100);  
Otu0113 4 FTp55\_1102\_15552\_2242\_(reversed) Bacteria(100);Verrucomicrobia(100);Verrucomicrobiae(100);Verrucomicrobiales(100);DEV007(100);unclassified(100);  
Otu0114 23 FTp55\_1101\_8687\_11094\_(reversed) Bacteria(100);Proteobacteria(100);Epsilonproteobacteria(100);Campylobacteriales(100);Campylobacteraceae(100);Arcobacter(100);  
Otu0115 6 FTp55\_1101\_4967\_20956\_(reversed) Bacteria(100);Proteobacteria(100);Alphaproteobacteria(100);Rhodobacterales(100);Rhodobacteraceae(100);unclassified(100);  
Otu0116 7 FTp55\_1102\_7137\_4581\_(reversed) Bacteria(100);Proteobacteria(100);Gammmaproteobacteria(100);unclassified(72);unclassified(72);unclassified(72);  
Otu0117 4 FTp55\_1102\_18095\_6869\_(reversed) Bacteria(100);Proteobacteria(100);Deltaproteobacteria(100);Bdellovibrionales(100);Bacterioviraceae(100);unclassified(100);  
Otu0118 4 FTp55\_1101\_17572\_11222\_(reversed) Bacteria(100);Proteobacteria(100);Gammmaproteobacteria(100);Thiotrichales(100);Francisellaceae(100);Francisella(100);  
Otu0119 4 FTp55\_1101\_5906\_8653\_(reversed) Bacteria(100);Proteobacteria(100);Gammmaproteobacteria(100);Alteromonadales(100);Alteromonadaceae(100);unclassified(100);  
Otu0120 62 FTp55\_1101\_10413\_8445\_(reversed) Bacteria(100);Bacteroidetes(100);Flavobacteria(100);Flavobacteriales(100);unclassified(100);unclassified(100);  
Otu0121 14 FTp55\_1101\_26541\_6944\_(reversed) Bacteria(100);Proteobacteria(100);Alphaproteobacteria(100);Rhodospirillales(100);Rhodospirillaceae(100);AEGEAN-169\_marine\_group(100);  
Otu0122 5 FTp55\_1101\_13105\_9049\_(reversed) Bacteria(100);Tenericutes(100);Mollicutes(100);NB1-n(100);unclassified(100);unclassified(100);  
Otu0123 34 FTp55\_1101\_5599\_10035\_(reversed) Bacteria(100);Bacteroidetes(100);Cytophagia(100);Cytophagales(100);Flammeovirgaceae(100);Marinoscillum(100);  
Otu0124 51 FTp55\_1101\_12929\_5158\_(reversed) Bacteria(100);Proteobacteria(100);Alphaproteobacteria(100);SAR11\_clade(100);Surface\_4(100);unclassified(100);  
Otu0125 12 FTp55\_1101\_25683\_17724\_(reversed) Bacteria(100);Proteobacteria(100);Gammmaproteobacteria(100);Vibrionales(100);Vibrionaceae(100);unclassified(100);  
Otu0126 37 FTp55\_1101\_23683\_14875\_(reversed) Bacteria(100);Gracilibacteria(100);unclassified(100);unclassified(100);unclassified(100);unclassified(100);  
Otu0127 16 FTp55\_1101\_10690\_3690\_(reversed) Bacteria(100);Bacteroidetes(100);Flavobacteria(100);Flavobacteriales(100);Flavobacteriaceae(100);Aquimarina(100);  
Otu0128 37 FTp55\_1101\_8280\_8375\_(reversed) Bacteria(100);Bacteroidetes(100);Flavobacteria(100);Flavobacteriales(100);Flavobacteriaceae(100);Owenweeksia(100);  
Otu0129 106 FTp55\_1101\_16544\_7075\_(reversed) Bacteria(100);Proteobacteria(100);Gammmaproteobacteria(100);Oceanospirillales(100);SAR86\_clade(99);unclassified(99);  
Otu0130 9 FTp55\_1101\_10483\_14862\_(reversed) Bacteria(100);Proteobacteria(100);Deltaproteobacteria(100);Bdellovibrionales(100);Bacterioviraceae(100);Halobacteriovirax(100);  
Otu0131 4 FTp55\_1102\_8162\_31500\_(reversed) Bacteria(100);Proteobacteria(100);Gammmaproteobacteria(100);Alteromonadales(100);Colwelliaceae(100);Thalassotalea(100);  
Otu0132 16 FTp55\_1101\_13598\_27702\_(reversed) Bacteria(100);unclassified(100);unclassified(100);unclassified(100);unclassified(100);unclassified(100);  
Otu0133 22 FTp55\_1102\_21131\_2756\_(reversed) Bacteria(100);Bacteroidetes(100);Sphingobacteriales(100);Sphingobacteriales(100);Saprospiraceae(100);unclassified(100);  
Otu0134 88 FTp55\_1101\_6999\_14586\_(reversed) Bacteria(100);Bacteroidetes(100);unclassified(77);unclassified(77);unclassified(77);unclassified(77);  
Otu0135 9 FTp55\_1101\_18915\_17664\_(reversed) Bacteria(100);Bacteroidetes(100);Flavobacteria(100);Flavobacteriales(100);Cryomorphaceae(100);Owenweeksia(100);  
Otu0136 355 FTp55\_1101\_12117\_5069\_(reversed) Bacteria(100);Proteobacteria(100);Alphaproteobacteria(100);Rhodospirillales(100);Rhodospirillaceae(100);AEGEAN-169\_marine\_group(100);  
Otu0137 11 FTp55\_1101\_24409\_16042\_(reversed) Bacteria(100);Proteobacteria(100);Deltaproteobacteria(100);Bdellovibrionales(100);Bacterioviraceae(100);Halobacteriovirax(73);  
Otu0138 12 FTp55\_1101\_9103\_13566\_(reversed) Bacteria(100);Proteobacteria(100);Alphaproteobacteria(100);unclassified(75);unclassified(75);unclassified(75);  
Otu0139 29 FTp55\_1101\_18270\_2060\_(reversed) Bacteria(100);Proteobacteria(100);Gammmaproteobacteria(100);Oceanospirillales(100);OM182\_clade(100);unclassified(100);  
Otu0140 6 FTp55\_1102\_11843\_15488\_(reversed) Bacteria(100);Proteobacteria(100);Epsilonproteobacteria(100);Campylobacteriales(100);Campylobacteraceae(100);Arcobacter(100);  
Otu0141 10 FTp55\_1102\_8751\_20236\_(reversed) Bacteria(100);Proteobacteria(100);Alphaproteobacteria(100);Rhodobacterales(100);Rhodobacteraceae(100);unclassified(100);  
Otu0142 7 FTp55\_1101\_27160\_8290\_(reversed) Bacteria(100);Proteobacteria(100);unclassified(72);unclassified(72);unclassified(72);unclassified(72);  
Otu0143 171 FTp55\_1101\_8398\_4450\_(reversed) Bacteria(100);Bacteroidetes(100);Flavobacteria(100);Flavobacteriales(100);Flavobacteriaceae(100);NS4\_marine\_group(100);  
Otu0144 6 FTp55\_1101\_3976\_3441\_(reversed) Bacteria(100);Proteobacteria(100);Alphaproteobacteria(100);Rhodospirillales(100);Rhodospirillaceae(100);Defluviococcus(100);  
Otu0145 86 FTp55\_1101\_6799\_9318\_(reversed) Bacteria(100);Bacteroidetes(100);Flavobacteria(100);Flavobacteriales(100);NS9\_marine\_group(100);unclassified(100);  
Otu0146 5 FTp55\_1101\_16355\_16707\_(reversed) Bacteria(100);Proteobacteria(100);Gammmaproteobacteria(100);Oceanospirillales(100);Oceanospirillaceae(100);Oceanospirillum(100);  
Otu0147 12 FTp55\_1101\_4370\_21114\_(reversed) Archaea(100);Euryarchaeota(100);Thermoplasmata(100);Thermoplasmatales(100);Marine\_Group\_II(100);unclassified(100);  
Otu0148 12 FTp55\_1101\_9270\_19009\_(reversed) Bacteria(100);Proteobacteria(100);Epsilonproteobacteria(100);Campylobacteriales(100);Campylobacteraceae(100);Arcobacter(100);  
Otu0149 25 FTp55\_1101\_18750\_8722\_(reversed) Bacteria(100);Proteobacteria(100);Gammmaproteobacteria(100);Oceanospirillales(100);Oceanospirillaceae(100);Oleispira(100);  
Otu0150 9 FTp55\_1101\_12346\_18701\_(reversed) Bacteria(100);Bacteroidetes(100);Flavobacteria(100);Flavobacteriales(100);NS9\_marine\_group(100);unclassified(100);  
Otu0151 9 FTp55\_1101\_18135\_4900\_(reversed) Bacteria(100);Bacteroidetes(100);Cytophagia(100);Cytophagales(100);Flammeovirgaceae(100);Reichenbachia(100);  
Otu0152 12 FTp55\_1101\_18041\_7323\_(reversed) Bacteria(100);Proteobacteria(100);Gammmaproteobacteria(100);Salinisphaerales(100);Salinisphaeraceae(100);Oceanococcus(100);  
Otu0153 5 FTp55\_1101\_8572\_11901\_(reversed) Bacteria(100);Proteobacteria(100);Alphaproteobacteria(100);Sphingomonadales(100);Erythrobacteraceae(100);Erythrobacter(100);  
Otu0154 6 FTp55\_1101\_19244\_22748\_(reversed) Bacteria(100);Proteobacteria(100);Gammmaproteobacteria(100);unclassified(100);unclassified(100);unclassified(100);  
Otu0155 11 FTp55\_1101\_12398\_3775\_(reversed) Bacteria(100);Proteobacteria(100);Alphaproteobacteria(100);Rickettsiales(100);SAR116\_clade(100);unclassified(100);  
Otu0156 153 FTp55\_1101\_13182\_2920\_(reversed) Bacteria(100);Marinimicrobia\_SAR406\_clade(100);unclassified(100);unclassified(100);unclassified(100);unclassified(100);  
Otu0157 102 FTp55\_1101\_20755\_11184\_(reversed) Bacteria(100);Proteobacteria(100);Alphaproteobacteria(100);Rickettsiales(100);SAR116\_clade(100);unclassified(100);  
Otu0158 9 FTp55\_1101\_15162\_13623\_(reversed) Archaea(100);Euryarchaeota(100);Thermoplasmata(100);Thermoplasmatales(100);Marine\_Group\_II(100);unclassified(100);  
Otu0159 5 FTp55\_1101\_11493\_9911\_(reversed) Bacteria(100);Bacteroidetes(100);Flavobacteria(100);Flavobacteriales(100);Flavobacteriaceae(100);Winogradskyella(100);  
Otu0160 4 FTp55\_1102\_22696\_11154\_(reversed) Bacteria(100);Tenericutes(100);Mollicutes(100);NB1-n(100);unclassified(100);unclassified(100);  
Otu0161 11 FTp55\_1101\_19195\_2702\_(reversed) Bacteria(100);Proteobacteria(100);Gammmaproteobacteria(100);Thiotrichales(82);Thiotrichaceae(82);Thiotrix(82);  
Otu0162 523 FTp55\_1101\_12956\_5198\_(reversed) Bacteria(100);Proteobacteria(100);Betaproteobacteria(100);Methylophilales(100);Methylophilaceae(100);OM43\_clade(100);  
Otu0163 83 FTp55\_1101\_8944\_3436\_(reversed) Bacteria(100);Proteobacteria(100);Alphaproteobacteria(100);unclassified(100);unclassified(100);unclassified(100);  
Otu0164 5 FTp55\_1101\_13790\_21110\_(reversed) Bacteria(100);Proteobacteria(100);Gammmaproteobacteria(100);Oceanospirillales(100);Alcanivoracaceae(100);Kangiella(100);  
Otu0165 4 FTp55\_1101\_21726\_6149\_(reversed) Bacteria(100);Proteobacteria(100);Deltaproteobacteria(100);Desulfobacteriales(100);Desulfobacteraceae(100);Desulfococcus(100);  
Otu0166 7 FTp55\_1101\_16291\_14387\_(reversed) Bacteria(100);Proteobacteria(100);Gammmaproteobacteria(100);Salinisphaerales(100);Salinisphaeraceae(100);Oceanococcus(100);  
Otu0167 4 FTp55\_1101\_12523\_12492\_(reversed) Bacteria(100);Proteobacteria(100);Alphaproteobacteria(100);Rhodobacterales(100);Rhodobacteraceae(100);unclassified(100);  
Otu0168 22 FTp55\_1102\_16631\_6691\_(reversed) Bacteria(100);Firmicutes(100);Clostridia(100);Clostridiales(100);Family\_XII(100);Fusibacter(100);  
Otu0169 11 FTp55\_1101\_21810\_13993\_(reversed) Bacteria(100);Proteobacteria(100);Gammmaproteobacteria(100);unclassified(100);unclassified(100);unclassified(100);  
Otu0170 4 FTp55\_1101\_19692\_22588\_(reversed) Bacteria(100);Proteobacteria(100);unclassified(100);unclassified(100);unclassified(100);unclassified(100);  
Otu0171 5 FTp55\_1101\_20571\_6662\_(reversed) Bacteria(100);Proteobacteria(100);unclassified(100);unclassified(100);unclassified(100);unclassified(100);  
Otu0172 4 FTp55\_1102\_24790\_11426\_(reversed) Bacteria(100);Bacteroidetes(100);Flavobacteria(100);Flavobacteriales(100);NS9\_marine\_group(100);unclassified(100);  
Otu0173 15 FTp55\_1101\_24914\_14984\_(reversed) Bacteria(100);Bacteroidetes(100);unclassified(100);unclassified(100);unclassified(100);unclassified(100);  
Otu0174 86 FTp55\_1101\_5159\_6600\_(reversed) Bacteria(100);Proteobacteria(100);Epsilonproteobacteria(100);Campylobacteriales(100);Campylobacteraceae(100);Arcobacter(100);  
Otu0175 5 FTp55\_1101\_20166\_16266\_(reversed) Bacteria(100);Proteobacteria(100);Alphaproteobacteria(100);Rickettsiales(100);SAR116\_clade(100);unclassified(100);  
Otu0176 9 FTp55\_1101\_21527\_4330\_(reversed) Bacteria(100);Bacteroidetes(100);Flavobacteria(100);Flavobacteriales(100);Flavobacteriaceae(100);unclassified(100);  
Otu0177 128 FTp55\_1101\_10371\_3388\_(reversed) Bacteria(100);Proteobacteria(100);Alphaproteobacteria(100);SAR11\_clade(100);Surface\_2(99);unclassified(99);  
Otu0178 7 FTp55\_1102\_28049\_18350\_(reversed) Bacteria(100);Proteobacteria(100);Deltaproteobacteria(100);Bdellovibrionales(100);Bdellovibrionaceae(100);OM27\_clade(100);  
Otu0179 6 FTp55\_1102\_18024\_16266\_(reversed) Bacteria(100);Proteobacteria(100);Alphaproteobacteria(100);Rhodobacterales(100);Rhodobacteraceae(100);unclassified(100);  
Otu0180 4 FTp55\_1102\_9543\_24674\_(reversed) Bacteria(100);Proteobacteria(100);Alphaproteobacteria(100);Rickettsiales(100);SAR116\_clade(100);unclassified(100);  
Otu0181 2 FTp55\_1101\_21213\_7258\_(reversed) Bacteria(100);unclassified(100);unclassified(100);unclassified(100);unclassified(100);unclassified(100);  
Otu0182 2 FTp55\_1101\_22193\_4386\_(reversed) Bacteria(100);Tenericutes(100);Mollicutes(100);Mollicutes\_RF9(100);unclassified(100);unclassified(100);  
Otu0183 2 FTp55\_1101\_22346\_10988\_(reversed) Bacteria(100);Proteobacteria(100);Alphaproteobacteria(100);DB1-14(100);unclassified(100);unclassified(100);  
Otu0184 2 FTp55\_1101\_22376\_4718\_(reversed) Bacteria(100);Proteobacteria(100);unclassified(100);unclassified(100);unclassified(100);unclassified(100);  
Otu0185 2 FTp55\_1101\_22110\_23539\_(reversed) Bacteria(100);Proteobacteria(100);Deltaproteobacteria(100);Desulfobacteriales(100);Desulfobulbaceae(100);unclassified(100);  
Otu0186 2 FTp55\_1101\_22641\_17699\_(reversed) Bacteria(100);unclassified(100);unclassified(100);unclassified(100);unclassified(100);unclassified(100);  
Otu0187 2 FTp55\_1101\_22692\_23753\_(reversed) Bacteria(100);Bacteroidetes(100);Flavobacteria(100);Flavobacteriales(100);Flavobacteriaceae(100);unclassified(100);  
Otu0188 2 FTp55\_1101\_23373\_9561\_(reversed) Bacteria(100);Proteobacteria(100);Alphaproteobacteria(100);Sneathiellales(100);Sneathiellaceae(100);Sneathiella(100);  
Otu0189 58 FTp55\_1101\_17710\_6589\_(reversed) Bacteria(100);Proteobacteria(100);Gammmaproteobacteria(100);KI89A\_clade(100);unclassified(100);unclassified(100);  
Otu0190 2 FTp55\_1101\_22023\_13241\_(reversed) Bacteria(100);Proteobacteria(100);Gammmaproteobacteria(100);unclassified(100);unclassified(100);unclassified(100);  
Otu0191 2 FTp55\_1101\_23989\_5459\_(reversed) Bacteria(100);Verrucomicrobia(100);Opitutae(100);MB11C04\_marine\_group(100);unclassified(100);unclassified(100);  
Otu0192 2 FTp55\_1101\_10902\_23984\_(reversed) Bacteria(100);Proteobacteria(100);Alphaproteobacteria(100);unclassified(100);unclassified(100);unclassified(100);  
Otu0193 2 FTp55\_1101\_24316\_12452\_(reversed) Bacteria(100);Proteobacteria(100);unclassified(100);unclassified(100);unclassified(100);unclassified(100);  
Otu0194 2 FTp55\_1101\_21936\_19105\_(reversed) Bacteria(100);Proteobacteria(100);Epsilonproteobacteria(100);Campylobacteriales(100);Campylobacteraceae(100);Arcobacter(100);  
Otu0195 2 FTp55\_1101\_24633\_14670\_(reversed) Bacteria(100);Bacteroidetes(100);unclassified(100);unclassified(100);unclassified(100);unclassified(100);  
Otu0196 2 FTp55\_1101\_2487\_11226\_(reversed) Bacteria(100);unclassified(100);unclassified(100);unclassified(100);unclassified(100);unclassified(100);  
Otu0197 2 FTp55\_1101\_25144\_14401\_(reversed) Bacteria(100);Proteobacteria(100);Alphaproteobacteria(100);unclassified(100);unclassified(100);unclassified(100);  
Otu0198 2 FTp55\_1101\_25448\_6193\_(reversed) Bacteria(100);Proteobacteria(100);Gammmaproteobacteria(100);Oceanospirillales(100);Oceanospirillaceae(100);Reinekeella(100);  
Otu0199 2 FTp55\_1101\_25451\_14336\_(reversed) Bacteria(100);Proteobacteria(100);Epsilonproteobacteria(100);Campylobacteriales(100);Campylobacteraceae(100);Arcobacter(100);  
Otu0200 2 FTp55\_1101\_25687\_13726\_(reversed) Bacteria(100);Proteobacteria(100);Gammmaproteobacteria(100);Oceanospirillales(100);unclassified(100);unclassified(100);  
Otu0201 2 FTp55\_1101\_21105\_13477\_(reversed) Bacteria(100);Bacteroidetes(100);Flavobacteria(100);Flavobacteriales(100);Cryomorphaceae(100);Fluviocella(100);  
Otu0202 2 FTp55\_1101\_26322\_24325\_(reversed) Bacteria(100);unclassified(100);unclassified(100);unclassified(100);unclassified(100);unclassified(100);  
Otu0203 2 FTp55\_1101\_26962\_23239\_(reversed) Bacteria(100);Proteobacteria(100);Alphaproteobacteria(100);Rhodobacterales(100);Rhodobacteraceae(100);unclassified(100);  
Otu0204 2 FTp55\_1101\_11087\_11644\_(reversed) Bacteria(100);Bacteroidetes(100);Flavobacteria(100);Flavobacteriales(100);Flavobacteriaceae(100);unclassified(100);  
Otu0205 39 FTp55\_1102\_21135\_22201\_(reversed) Bacteria(100);Proteobacteria(100);Gammmaproteobacteria(100);Oceanospirillales(100);unclassified(100);unclassified(100);  
Otu0206 2 FTp55\_1101\_11199\_15038\_(reversed) Bacteria(100);unclassified(100);unclassified(100);unclassified(100);unclassified(100);unclassified(100);  
Otu0207 2 FTp55\_1101\_27755\_9306\_(reversed) Bacteria(100);Proteobacteria(100);Gammmaproteobacteria(100);Cellvibrionales(100);Portioccocaceae(100);SAR92\_clade(100);  
Otu0208 2 FTp55\_1101\_28447\_16844\_(reversed) Bacteria(100);Proteobacteria(100);Gammmaproteobacteria(100);Oceanospirillales(100);Litoricolaceae(100);Litoricola(100);  
Otu0209 2 FTp55\_1101\_28496\_11808\_(reversed) Bacteria(100);Fusobacteria(100);Fusobacteriales(100);Fusobacteriaceae(100);Fusobacterium(100);  
Otu0210 2 FTp55\_1101\_3083\_16182\_(reversed) Bacteria(100);Proteobacteria(100);unclassified(100);unclassified(100);unclassified(100);unclassified(100);  
Otu0211 2 FTp55\_1101\_10662\_17152\_(reversed) Bacteria(100);Bacteroidetes(100);unclassified(100);unclassified(100);unclassified(100);unclassified(100);  
Otu0212 2 FTp55\_1101\_20579\_24818\_(reversed) Bacteria(100);Proteobacteria(100);Alphaproteobacteria(100);Rickettsiales(100);SAR116\_clade(100);unclassified(100);  
Otu0213 2 FTp55\_1101\_20565\_21111\_(reversed) Bacteria(100);Proteobacteria(100);Gammmaproteobacteria(100);Oceanospirillales(100);Alcanivoracaceae(100);Kangiella(100);  
Otu0214 2 FTp55\_1101\_4365\_18275\_(reversed) Bacteria(100);Proteobacteria(100);Alphaproteobacteria(100);Rickettsiales(100);unclassified(100);unclassified(100);



|         |     |                                   |                                                                                                                                           |
|---------|-----|-----------------------------------|-------------------------------------------------------------------------------------------------------------------------------------------|
| Otu0215 | 2   | FTP55_1101_11217_8851_(reversed)  | Bacteria(100);Bacteroidetes(100);unclassified(100);unclassified(100);unclassified(100);unclassified(100);                                 |
| Otu0216 | 2   | FTP55_1101_4673_18632_(reversed)  | Bacteria(100);Proteobacteria(100);Deltaproteobacteria(100);SAR324_clade(Marine_group_B)(100);unclassified(100);unclassified(100);         |
| Otu0217 | 2   | FTP55_1101_4715_14416_(reversed)  | Bacteria(100);Proteobacteria(100);Deltaproteobacteria(100);Myxococcales(100);unclassified(100);unclassified(100);                         |
| Otu0218 | 2   | FTP55_1101_4839_17172_(reversed)  | Bacteria(100);Proteobacteria(100);Gammaproteobacteria(100);Pseudomonadales(100);Moraxellaceae(100);Moraxella(100);                        |
| Otu0219 | 2   | FTP55_1101_4842_10528_(reversed)  | Bacteria(100);Bacteroidetes(100);unclassified(100);unclassified(100);unclassified(100);unclassified(100);                                 |
| Otu0220 | 2   | FTP55_1101_20428_15271_(reversed) | Bacteria(100);Proteobacteria(100);Gammaproteobacteria(100);Oceanospirillales(100);Oceanospirillaceae(100);Marinobacterium(100);           |
| Otu0221 | 4   | FTP55_1101_20281_6864_(reversed)  | Bacteria(100);Proteobacteria(100);Gammaproteobacteria(100);unclassified(100);unclassified(100);unclassified(100);                         |
| Otu0222 | 43  | FTP55_1101_23604_12552_(reversed) | Bacteria(100);Cyanobacteria(100);Cyanobacteria(100);Subsection(100);Family(100);Prochlorococcus(100);                                     |
| Otu0223 | 2   | FTP55_1101_14483_19156_(reversed) | Bacteria(100);Bacteroidetes(100);unclassified(100);unclassified(100);unclassified(100);unclassified(100);                                 |
| Otu0224 | 2   | FTP55_1101_19825_14629_(reversed) | Bacteria(100);Bacteroidetes(100);Flavobacteria(100);Flavobacteriales(100);Cryomorphaceae(100);Owenweeksia(100);                           |
| Otu0225 | 2   | FTP55_1101_5444_5871_(reversed)   | Bacteria(100);Proteobacteria(100);Gammaproteobacteria(100);Alteromonadales(100);unclassified(100);unclassified(100);                      |
| Otu0226 | 2   | FTP55_1101_5491_10272_(reversed)  | Bacteria(100);Proteobacteria(100);Alphaproteobacteria(100);Rhodospirillales(100);Rhodospirillaceae(100);Defluviococcus(100);              |
| Otu0227 | 2   | FTP55_1101_11326_21584_(reversed) | Bacteria(100);Firmicutes(100);Clostridia(100);Clostridiales(100);unclassified(100);unclassified(100);                                     |
| Otu0228 | 2   | FTP55_1101_5736_11661_(reversed)  | Bacteria(100);unclassified(100);unclassified(100);unclassified(100);unclassified(100);unclassified(100);                                  |
| Otu0229 | 2   | FTP55_1101_18735_21743_(reversed) | Bacteria(100);Bacteroidetes(100);Flavobacteria(100);Flavobacteriales(100);Cryomorphaceae(100);Owenweeksia(100);                           |
| Otu0230 | 2   | FTP55_1101_11339_23580_(reversed) | Bacteria(100);Proteobacteria(100);Deltaproteobacteria(100);Desulfobacteriales(100);Desulfobulbaceae(100);Desulfopila(100);                |
| Otu0231 | 2   | FTP55_1101_6069_17581_(reversed)  | Bacteria(100);Proteobacteria(100);unclassified(100);unclassified(100);unclassified(100);unclassified(100);                                |
| Otu0232 | 2   | FTP55_1101_6148_7391_(reversed)   | Bacteria(100);Proteobacteria(100);unclassified(100);unclassified(100);unclassified(100);unclassified(100);                                |
| Otu0233 | 4   | FTP55_1101_6347_7584_(reversed)   | Bacteria(100);Bacteroidetes(100);Flavobacteria(100);Flavobacteriales(100);Flavobacteriaceae(100);NS2b_marine_group(100);                  |
| Otu0234 | 2   | FTP55_1101_6711_14777_(reversed)  | Bacteria(100);Proteobacteria(100);Gammaproteobacteria(100);NKBS5(100);unclassified(100);unclassified(100);                                |
| Otu0235 | 2   | FTP55_1101_6731_15967_(reversed)  | Bacteria(100);Bacteroidetes(100);Flavobacteria(100);Flavobacteriales(100);Flavobacteriaceae(100);NSS_marine_group(100);                   |
| Otu0236 | 2   | FTP55_1101_6866_6786_(reversed)   | Bacteria(100);Bacteroidetes(100);Bacteroidia(100);Bacteroidia_Incertae_Sedis(100);Draconibacteriaceae(100);Draconibacterium(100);         |
| Otu0237 | 2   | FTP55_1101_19514_28088_(reversed) | Bacteria(100);Proteobacteria(100);unclassified(100);unclassified(100);unclassified(100);unclassified(100);                                |
| Otu0238 | 2   | FTP55_1101_6892_24645_(reversed)  | Bacteria(100);Proteobacteria(100);Alphaproteobacteria(100);Rhodobacterales(100);Rhodobacteraceae(100);unclassified(100);                  |
| Otu0239 | 311 | FTP55_1101_23489_5178_(reversed)  | Bacteria(100);Cyanobacteria(100);Cyanobacteria(100);Subsection(100);Family(100);Synecococcus(100);                                        |
| Otu0240 | 2   | FTP55_1101_7010_17744_(reversed)  | Bacteria(100);Proteobacteria(100);Alphaproteobacteria(100);unclassified(100);unclassified(100);unclassified(100);                         |
| Otu0241 | 2   | FTP55_1101_7133_22770_(reversed)  | Bacteria(100);Bacteroidetes(100);Flavobacteria(100);Flavobacteriales(100);Cryomorphaceae(100);Owenweeksia(100);                           |
| Otu0242 | 2   | FTP55_1101_7323_24916_(reversed)  | Bacteria(100);Lentisphaerae(100);Lentisphaeria(100);Lentisphaerales(100);Lentisphaeraceae(100);Lentisphaera(100);                         |
| Otu0243 | 2   | FTP55_1101_11966_14846_(reversed) | Bacteria(100);Bacteroidetes(100);unclassified(100);unclassified(100);unclassified(100);unclassified(100);                                 |
| Otu0244 | 2   | FTP55_1101_7829_18093_(reversed)  | Bacteria(100);Proteobacteria(100);Gammaproteobacteria(100);Oceanospirillales(100);unclassified(100);unclassified(100);                    |
| Otu0245 | 2   | FTP55_1101_11680_6327_(reversed)  | Bacteria(100);Proteobacteria(100);Gammaproteobacteria(100);Oceanospirillales(100);Oceanospirillaceae(100);unclassified(100);              |
| Otu0246 | 29  | FTP55_1101_21102_25059_(reversed) | Bacteria(100);Bacteroidetes(100);Bacteroidia(100);Bacteroidia_Incertae_Sedis(100);Prolifibacteraceae(100);Prolifibacter(100);             |
| Otu0247 | 2   | FTP55_1101_8073_23009_(reversed)  | Bacteria(100);Proteobacteria(100);Gammaproteobacteria(100);Cellvibrionales(100);Cellvibrionaceae(100);unclassified(100);                  |
| Otu0248 | 2   | FTP55_1101_8327_4950_(reversed)   | Bacteria(100);Bacteroidetes(100);Flavobacteria(100);Flavobacteriales(100);Cryomorphaceae(100);Owenweeksia(100);                           |
| Otu0249 | 50  | FTP55_1101_20928_5110_(reversed)  | Bacteria(100);Proteobacteria(100);Alphaproteobacteria(100);Rickettsiales(100);SAR116_clade(100);unclassified(100);                        |
| Otu0250 | 2   | FTP55_1101_8511_20508_(reversed)  | Bacteria(100);Proteobacteria(100);Deltaproteobacteria(100);Bdellovibrionales(100);Bacteriovoracaceae(100);Pereidbacter(100);              |
| Otu0251 | 25  | FTP55_1101_10278_3093_(reversed)  | Bacteria(100);Cyanobacteria(100);unclassified(100);unclassified(100);unclassified(100);unclassified(100);                                 |
| Otu0252 | 2   | FTP55_1101_10880_16811_(reversed) | Bacteria(100);Proteobacteria(100);Deltaproteobacteria(100);Desulfuromonadales(100);GR-WP33-58(100);unclassified(100);                     |
| Otu0253 | 2   | FTP55_1101_8768_12295_(reversed)  | Bacteria(100);Proteobacteria(100);Gammaproteobacteria(100);Cellvibrionales(100);Halleaeaceae(100);OM60(NORS)_clade(100);                  |
| Otu0254 | 2   | FTP55_1101_19279_7219_(reversed)  | Bacteria(100);Bacteroidetes(100);Flavobacteria(100);Flavobacteriales(100);Flavobacteriaceae(100);unclassified(100);                       |
| Otu0255 | 2   | FTP55_1101_19217_25639_(reversed) | Bacteria(100);Bacteroidetes(100);unclassified(100);unclassified(100);unclassified(100);unclassified(100);                                 |
| Otu0256 | 2   | FTP55_1101_9292_3887_(reversed)   | Bacteria(100);Tenericutes(100);Mollicutes(100);Acholeplasmatales(100);Acholeplasmataceae(100);Acholeplasma(100);                          |
| Otu0257 | 2   | FTP55_1101_9355_14569_(reversed)  | Bacteria(100);Proteobacteria(100);Alphaproteobacteria(100);unclassified(100);unclassified(100);unclassified(100);                         |
| Otu0258 | 2   | FTP55_1101_9451_9193_(reversed)   | Bacteria(100);Bacteroidetes(100);Bacteroidia(100);Bacteroidales(100);Marinilabiaceae(100);Marinifilum(100);                               |
| Otu0259 | 2   | FTP55_1101_9291_8955_(reversed)   | Bacteria(100);Proteobacteria(100);Gammaproteobacteria(100);unclassified(100);unclassified(100);unclassified(100);                         |
| Otu0260 | 2   | FTP55_1102_10067_16503_(reversed) | Bacteria(100);Bacteroidetes(100);Sphingobacteria(100);Sphingobacteriales(100);NS11-12_marine_group(100);unclassified(100);                |
| Otu0261 | 2   | FTP55_1101_11482_20957_(reversed) | Bacteria(100);Proteobacteria(100);Gammaproteobacteria(100);unclassified(100);unclassified(100);unclassified(100);                         |
| Otu0262 | 2   | FTP55_1102_10793_3192_(reversed)  | Bacteria(100);Gracilibacteria(100);unclassified(100);unclassified(100);unclassified(100);unclassified(100);                               |
| Otu0263 | 26  | FTP55_1101_12299_21356_(reversed) | Bacteria(100);Bacteroidetes(100);unclassified(100);unclassified(100);unclassified(100);unclassified(100);                                 |
| Otu0264 | 2   | FTP55_1101_19139_23564_(reversed) | Bacteria(100);Bacteroidetes(100);Cytophagia(100);Cytophagales(100);Flammeovirgaceae(100);Fabilacter(100);                                 |
| Otu0265 | 2   | FTP55_1102_12100_16095_(reversed) | Bacteria(100);Bacteroidetes(100);unclassified(100);unclassified(100);unclassified(100);unclassified(100);                                 |
| Otu0266 | 2   | FTP55_1102_12670_3833_(reversed)  | Bacteria(100);Proteobacteria(100);Deltaproteobacteria(100);Bdellovibrionales(100);Bacteriovoracaceae(100);Halobacteriovorax(100);         |
| Otu0267 | 2   | FTP55_1101_19124_14851_(reversed) | Bacteria(100);Proteobacteria(100);Gammaproteobacteria(100);unclassified(100);unclassified(100);unclassified(100);                         |
| Otu0268 | 2   | FTP55_1101_4358_39686_(reversed)  | Bacteria(100);Proteobacteria(100);Alphaproteobacteria(100);Rhodobacterales(100);Rhodobacteraceae(100);unclassified(100);                  |
| Otu0269 | 2   | FTP55_1102_13711_6233_(reversed)  | Bacteria(100);Bacteroidetes(100);Flavobacteria(100);Flavobacteriales(100);Cryomorphaceae(100);Owenweeksia(100);                           |
| Otu0270 | 20  | FTP55_1101_9621_14005_(reversed)  | Bacteria(100);Proteobacteria(100);Gammaproteobacteria(100);Alteromonadales(100);Alteromonadaceae(100);unclassified(100);                  |
| Otu0271 | 2   | FTP55_1101_3688_12769_(reversed)  | Bacteria(100);Proteobacteria(100);Alphaproteobacteria(100);Rickettsiales(100);SAR116_clade(100);unclassified(100);                        |
| Otu0272 | 2   | FTP55_1102_14411_5703_(reversed)  | Bacteria(100);Proteobacteria(100);Gammaproteobacteria(100);unclassified(100);unclassified(100);unclassified(100);                         |
| Otu0273 | 2   | FTP55_1101_29070_12518_(reversed) | Bacteria(100);Proteobacteria(100);Gammaproteobacteria(100);Oceanospirillales(100);Oceanospirillaceae(100);unclassified(100);              |
| Otu0274 | 2   | FTP55_1102_14481_11112_(reversed) | Bacteria(100);Bacteroidetes(100);unclassified(100);unclassified(100);unclassified(100);unclassified(100);                                 |
| Otu0275 | 2   | FTP55_1102_14522_3800_(reversed)  | Bacteria(100);Lentisphaerae(100);Oligosphaeria(100);unclassified(100);unclassified(100);unclassified(100);                                |
| Otu0276 | 2   | FTP55_1102_14589_10807_(reversed) | Bacteria(100);Bacteroidetes(100);Cytophagia(100);Cytophagales(100);Flammeovirgaceae(100);Marinosillum(100);                               |
| Otu0277 | 2   | FTP55_1102_14737_11859_(reversed) | Bacteria(100);Proteobacteria(100);Deltaproteobacteria(100);Oligoflexales(100);Oligoflexaceae(100);unclassified(100);                      |
| Otu0278 | 2   | FTP55_1102_14752_4745_(reversed)  | Bacteria(100);Proteobacteria(100);Alphaproteobacteria(100);Rickettsiales(100);SAR116_clade(100);unclassified(100);                        |
| Otu0279 | 2   | FTP55_1102_14755_10181_(reversed) | Bacteria(100);Bacteroidetes(100);Flavobacteria(100);Flavobacteriales(100);unclassified(100);unclassified(100);                            |
| Otu0280 | 2   | FTP55_1102_16146_8771_(reversed)  | Bacteria(100);Proteobacteria(100);Alphaproteobacteria(100);Rhodospirillales(100);Rhodospirillaceae(100);AEGEAN-169_marine_group(100);     |
| Otu0281 | 2   | FTP55_1102_16161_3737_(reversed)  | Bacteria(100);Proteobacteria(100);Alphaproteobacteria(100);Rhodobacterales(100);Rhodobacteraceae(100);unclassified(100);                  |
| Otu0282 | 2   | FTP55_1101_11526_14087_(reversed) | Bacteria(100);Bacteroidetes(100);unclassified(100);unclassified(100);unclassified(100);unclassified(100);                                 |
| Otu0283 | 2   | FTP55_1102_16509_20036_(reversed) | Bacteria(100);Proteobacteria(100);Gammaproteobacteria(100);Oceanospirillales(100);Oceanospirillaceae(100);Oceaniserpentilla(100);         |
| Otu0284 | 2   | FTP55_1101_18620_15716_(reversed) | Bacteria(100);Proteobacteria(100);Gammaproteobacteria(100);Alteromonadales(100);unclassified(100);unclassified(100);                      |
| Otu0285 | 2   | FTP55_1102_16758_12898_(reversed) | Bacteria(100);Proteobacteria(100);Deltaproteobacteria(100);Desulfuromonadales(100);unclassified(100);unclassified(100);                   |
| Otu0286 | 2   | FTP55_1102_17482_2776_(reversed)  | Bacteria(100);Bacteroidetes(100);Flavobacteria(100);Flavobacteriales(100);Flavobacteriaceae(100);unclassified(100);                       |
| Otu0287 | 2   | FTP55_1102_18511_2178_(reversed)  | Bacteria(100);Proteobacteria(100);Deltaproteobacteria(100);Bdellovibrionales(100);Bdellovibrionaceae(100);OM27_clade(100);                |
| Otu0288 | 2   | FTP55_1102_18911_5551_(reversed)  | Bacteria(100);Proteobacteria(100);Gammaproteobacteria(100);unclassified(100);unclassified(100);unclassified(100);                         |
| Otu0289 | 19  | FTP55_1101_11740_14102_(reversed) | Bacteria(100);Proteobacteria(100);Gammaproteobacteria(100);Oceanospirillales(100);Oceanospirillaceae(100);Marinomonas(100);               |
| Otu0290 | 2   | FTP55_101_24708_9146_(reversed)   | Bacteria(100);Proteobacteria(100);Gammaproteobacteria(100);Alteromonadales(100);unclassified(100);unclassified(100);                      |
| Otu0291 | 59  | FTP55_1101_22226_12011_(reversed) | Bacteria(100);Bacteroidetes(100);Flavobacteria(100);Flavobacteriales(100);Flavobacteriaceae(100);NSS_marine_group(100);                   |
| Otu0292 | 2   | FTP55_1102_20662_2432_(reversed)  | Bacteria(100);Bacteroidetes(100);Flavobacteria(100);Flavobacteriales(100);Cryomorphaceae(100);Owenweeksia(100);                           |
| Otu0293 | 35  | FTP55_1101_9195_9715_(reversed)   | Bacteria(100);Proteobacteria(100);Alphaproteobacteria(100);Rhodobacterales(100);Rhodobacteraceae(100);unclassified(100);                  |
| Otu0294 | 2   | FTP55_1102_20957_12728_(reversed) | Bacteria(100);Proteobacteria(100);Alphaproteobacteria(100);Rhodobacterales(100);Rhodobacteraceae(100);unclassified(100);                  |
| Otu0295 | 2   | FTP55_1102_20989_8298_(reversed)  | Bacteria(100);Proteobacteria(100);Gammaproteobacteria(100);Oceanospirillales(100);Oceanospirillaceae(100);Nepuniibacter(100);             |
| Otu0296 | 2   | FTP55_1101_18492_7454_(reversed)  | Bacteria(100);Firmicutes(100);Clostridia(100);Clostridiales(100);Lachnospiraceae(100);unclassified(100);                                  |
| Otu0297 | 2   | FTP55_1102_21879_19430_(reversed) | Bacteria(100);Bacteroidetes(100);Flavobacteria(100);Flavobacteriales(100);NS9_marine_group(100);unclassified(100);                        |
| Otu0298 | 40  | FTP55_1101_14650_28277_(reversed) | Bacteria(100);Bacteroidetes(100);Alphaproteobacteria(100);Flavobacteriales(100);Flavobacteriaceae(100);NSS_marine_group(100);             |
| Otu0299 | 2   | FTP55_1101_22444_23767_(reversed) | Bacteria(100);Firmicutes(100);Clostridia(100);Clostridiales(100);Family_XII(100);Fusibacter(100);                                         |
| Otu0300 | 2   | FTP55_1101_12105_16676_(reversed) | Bacteria(100);Proteobacteria(100);Gammaproteobacteria(100);Alteromonadales(100);Alteromonadaceae(100);unclassified(100);                  |
| Otu0301 | 2   | FTP55_1102_25264_9549_(reversed)  | Bacteria(100);Fusobacteria(100);Fusobacteriales(100);Leptotrichiaceae(100);Sebaldella(100);                                               |
| Otu0302 | 2   | FTP55_1102_27547_11169_(reversed) | Bacteria(100);Tenericutes(100);Mollicutes(100);Entomoplasmatales(100);Entomoplasmatales_Incertae_Sedis(100);Candidatus_Hepatoplasma(100); |
| Otu0303 | 2   | FTP55_1102_4779_7559_(reversed)   | Bacteria(100);Marinimicrobia_(SAR406_clade)(100);unclassified(100);unclassified(100);unclassified(100);unclassified(100);                 |
| Otu0304 | 2   | FTP55_1102_5136_12481_(reversed)  | Bacteria(100);Firmicutes(100);Clostridia(100);Clostridiales(100);unclassified(100);unclassified(100);unclassified(100);                   |
| Otu0305 | 2   | FTP55_1102_5544_10564_(reversed)  | Bacteria(100);Bacteroidetes(100);Flavobacteria(100);Flavobacteriales(100);Flavobacteriaceae(100);unclassified(100);                       |
| Otu0306 | 2   | FTP55_1102_5765_12310_(reversed)  | Bacteria(100);Proteobacteria(100);Alphaproteobacteria(100);Rhodobacterales(100);Rhodobacteraceae(100);unclassified(100);                  |
| Otu0307 | 2   | FTP55_101_23154_9627_(reversed)   | Bacteria(100);Proteobacteria(100);Alphaproteobacteria(100);DB1-14(100);unclassified(100);unclassified(100);                               |
| Otu0308 | 2   | FTP55_1102_7706_6870_(reversed)   | Bacteria(100);Proteobacteria(100);unclassified(100);unclassified(100);unclassified(100);unclassified(100);                                |
| Otu0309 | 2   | FTP55_1102_8401_13690_(reversed)  | Bacteria(100);Proteobacteria(100);Epsilonproteobacteria(100);Campylobacteriales(100);Campylobacteraceae(100);Arcobacter(100);             |
| Otu0310 | 2   | FTP55_1101_17873_15860_(reversed) | Bacteria(100);Proteobacteria(100);Gammaproteobacteria(100);unclassified(100);unclassified(100);unclassified(100);                         |
| Otu0311 | 2   | FTP55_1101_17863_20458_(reversed) | Bacteria(100);Proteobacteria(100);Gammaproteobacteria(100);Oceanospirillales(100);Oceanospirillaceae(100);unclassified(100);              |
| Otu0312 | 16  | FTP55_1101_7666_6256_(reversed)   | Bacteria(100);Proteobacteria(100);Gammaproteobacteria(100);unclassified(100);unclassified(100);unclassified(100);                         |
| Otu0313 | 2   | FTP55_1102_9426_7285_(reversed)   | Bacteria(100);Proteobacteria(100);Gammaproteobacteria(100);unclassified(100);unclassified(100);unclassified(100);                         |
| Otu0314 | 2   | FTP55_1102_9499_5395_(reversed)   | Bacteria(100);Proteobacteria(100);Alphaproteobacteria(100);Rhizobiales(100);Rhodobiaceae(100);Rhodobiaceae(100);                          |
| Otu0315 | 2   | FTP55_101_22416_15482_(reversed)  | Bacteria(100);Proteobacteria(100);Epsilonproteobacteria(100);Campylobacteriales(100);Campylobacteraceae(100);Arcobacter(100);             |
| Otu0316 | 2   | FTP55_1101_12237_9893_(reversed)  | Bacteria(100);Verrucomicrobia(100);Verrucomicrobiae(100);Verrucomicrobiales(100);Verrucomicrobiaceae(100);Roseibacillus(100);             |
| Otu0317 | 2   | FTP55_1101_17726_16900_(reversed) | Bacteria(100);Bacteroidetes(100);Flavobacteria(100);Flavobacteriales(100);unclassified(100);unclassified(100);                            |
| Otu0318 | 2   | FTP55_1101_17576_11791_(reversed) | Bacteria(100);Proteobacteria(100);Alphaproteobacteria(100);unclassified(100);unclassified(100);unclassified(100);                         |
| Otu0319 | 28  | FTP55_1101_17648_12999_(reversed) | Bacteria(100);Proteobacteria(100);Gammaproteobacteria(100);Order_Incertae_Sedis(100);Family_Incertae_Sedis(100);Marinicella(100);         |
| Otu0320 | 22  | FTP55_1101_15645_5410_(reversed)  | Bacteria(100);Marinimicrobia_(SAR406_clade)(100);unclassified(100);unclassified(100);unclassified(100);unclassified(100);                 |
| Otu0321 | 2   | FTP55_1101_12268_24133_(reversed) | Bacteria(100);Bacteroidetes(100);Flavobacteria(100);Flavobacteriales(100);Cryomorphaceae(100);Owenweeksia(100);                           |
| Otu0322 | 2   | FTP55_101_20400_14137_(reversed)  | Bacteria(100);Proteobacteria(100);unclassified(100);unclassified(100);unclassified(100);unclassified(100);                                |

|         |    |                                     |                                                                                                                                        |
|---------|----|-------------------------------------|----------------------------------------------------------------------------------------------------------------------------------------|
| Otu0323 | 2  | FTP55_1101_17480_8125__ (reversed)  | Bacteria(100);Proteobacteria(100);Epsilonproteobacteria(100);unclassified(100);unclassified(100);unclassified(100);                    |
| Otu0324 | 3  | FTP55_1101_15868_13586__ (reversed) | Bacteria(100);Bacteroidetes(100);Flavobacteria(100);Flavobacteriales(100);Flavobacteriaceae(100);unclassified(100);                    |
| Otu0325 | 2  | FTP55_1101_17405_15543__ (reversed) | Bacteria(100);Proteobacteria(100);Gammaproteobacteria(100);Vibrionales(100);Vibrionaceae(100);unclassified(100);                       |
| Otu0326 | 3  | FTP55_1101_16446_9311__ (reversed)  | Bacteria(100);Proteobacteria(100);Alphaproteobacteria(100);SAR11_clade(100);Surface_1(100);unclassified(100);                          |
| Otu0327 | 3  | FTP55_1101_16502_10331__ (reversed) | Bacteria(100);Bacteroidetes(100);unclassified(100);unclassified(100);unclassified(100);unclassified(100);                              |
| Otu0328 | 2  | FTP55_1101_17344_8044__ (reversed)  | Bacteria(100);Bacteroidetes(100);Flavobacteria(100);Flavobacteriales(100);Flavobacteriaceae(100);N55_marine_group(100);                |
| Otu0329 | 2  | FTP55_1101_12302_4675__ (reversed)  | Bacteria(100);Proteobacteria(100);Alphaproteobacteria(100);Rhodospirillales(100);Rhodospirillaceae(100);Novispirillum(100);            |
| Otu0330 | 3  | FTP55_1101_19442_10865__ (reversed) | Bacteria(100);Proteobacteria(100);Deltaproteobacteria(100);Bdellovibrionales(100);Bdellovibrionaceae(100);Bdellovibri(100);            |
| Otu0331 | 2  | FTP55_1101_17167_22020__ (reversed) | Bacteria(100);Proteobacteria(100);Betaproteobacteria(100);unclassified(100);unclassified(100);unclassified(100);                       |
| Otu0332 | 3  | FTP55_1101_19805_15220__ (reversed) | Bacteria(100);unclassified(100);unclassified(100);unclassified(100);unclassified(100);unclassified(100);                               |
| Otu0333 | 3  | FTP55_1101_19987_12172__ (reversed) | Bacteria(100);Proteobacteria(100);Alphaproteobacteria(100);4-Org1-14(100);unclassified(100);unclassified(100);                         |
| Otu0334 | 3  | FTP55_1101_21823_11572__ (reversed) | Bacteria(100);Bacteroidetes(100);unclassified(100);unclassified(100);unclassified(100);unclassified(100);                              |
| Otu0335 | 3  | FTP55_1101_22559_14853__ (reversed) | Bacteria(100);Proteobacteria(100);Epsilonproteobacteria(100);Campylobacteriales(100);Campylobacteraceae(100);Arcobacter(100);          |
| Otu0336 | 3  | FTP55_1101_22563_9110__ (reversed)  | Bacteria(100);Proteobacteria(100);Alphaproteobacteria(100);Kordiimonadales(100);unclassified(100);unclassified(100);                   |
| Otu0337 | 3  | FTP55_1101_25037_9111__ (reversed)  | Bacteria(100);Bacteroidetes(100);Sphingobacteria(100);Sphingobacteriales(100);Saprospiraceae(100);unclassified(100);                   |
| Otu0338 | 2  | FTP55_1101_12492_27121__ (reversed) | Bacteria(100);Proteobacteria(100);Epsilonproteobacteria(100);unclassified(100);unclassified(100);unclassified(100);                    |
| Otu0339 | 15 | FTP55_1101_17979_25670__ (reversed) | Bacteria(100);Verrucomicrobia(100);Verrucomicrobiae(100);Verrucomicrobiales(100);Verrucomicrobiaceae(100);Roseibacillus(100);          |
| Otu0340 | 17 | FTP55_1101_17379_2190__ (reversed)  | Bacteria(100);Proteobacteria(100);Gammaproteobacteria(100);Alteromonadales(100);Pseudoalteromonadaceae(100);Psychrosphaera(100);       |
| Otu0341 | 3  | FTP55_1101_27351_8450__ (reversed)  | Bacteria(100);Proteobacteria(100);Alphaproteobacteria(100);Rickettsiales(100);SAR116_clade(100);unclassified(100);                     |
| Otu0342 | 3  | FTP55_1101_28108_10151__ (reversed) | Bacteria(100);Firmicutes(100);Bacilli(100);Lactobacillales(100);Streptococcales(100);Streptococcus(100);                               |
| Otu0343 | 3  | FTP55_1101_3373_14563__ (reversed)  | Bacteria(100);Proteobacteria(100);unclassified(100);unclassified(100);unclassified(100);unclassified(100);                             |
| Otu0344 | 2  | FTP55_101_18811_24684__ (reversed)  | Bacteria(100);Proteobacteria(100);Alphaproteobacteria(100);Rickettsiales(100);unclassified(100);unclassified(100);                     |
| Otu0345 | 3  | FTP55_1101_4970_6526__ (reversed)   | Bacteria(100);Bacteroidetes(100);Cytophagia(100);Cytophagales(100);unclassified(100);unclassified(100);                                |
| Otu0346 | 3  | FTP55_1101_5434_13513__ (reversed)  | Bacteria(100);Proteobacteria(100);Gammaproteobacteria(100);Oceanospirillales(100);unclassified(100);unclassified(100);                 |
| Otu0347 | 3  | FTP55_1101_6061_8793__ (reversed)   | Bacteria(100);Cyanobacteria(100);Cyanobacteria(100);unclassified(100);unclassified(100);unclassified(100);                             |
| Otu0348 | 3  | FTP55_1101_7463_11935__ (reversed)  | Bacteria(100);Proteobacteria(100);Gammaproteobacteria(100);Oceanospirillales(100);Litoricolaceae(100);Litoricola(100);                 |
| Otu0349 | 2  | FTP55_1101_16846_4431__ (reversed)  | Bacteria(100);Proteobacteria(100);SC3-20(100);unclassified(100);unclassified(100);unclassified(100);                                   |
| Otu0350 | 2  | FTP55_101_17862_9298__ (reversed)   | Bacteria(100);Bacteroidetes(100);unclassified(100);unclassified(100);unclassified(100);unclassified(100);                              |
| Otu0351 | 5  | FTP55_1102_8492_5707__ (reversed)   | Bacteria(100);Bacteroidetes(100);Flavobacteria(100);Flavobacteriales(100);Flavobacteriaceae(100);Winogradskyella(100);                 |
| Otu0352 | 2  | FTP55_101_17212_14536__ (reversed)  | Bacteria(100);Bacteroidetes(100);Flavobacteria(100);Flavobacteriales(100);Flavobacteriaceae(100);Aquibacter(100);                      |
| Otu0353 | 4  | FTP55_102_13595_9468__ (reversed)   | Bacteria(100);Proteobacteria(100);Gammaproteobacteria(100);Cellvibrionales(100);Haliaceae(100);Pseudohalaea(100);                      |
| Otu0354 | 14 | FTP55_1101_18796_5694__ (reversed)  | Bacteria(100);Proteobacteria(100);Gammaproteobacteria(100);Oceanospirillales(100);Alcanivoracaeae(100);Alcanivorax(100);               |
| Otu0355 | 2  | FTP55_101_17061_8022__ (reversed)   | Bacteria(100);Proteobacteria(100);Alphaproteobacteria(100);Rickettsiales(100);SAR116_clade(100);unclassified(100);                     |
| Otu0356 | 4  | FTP55_1101_11848_4295__ (reversed)  | Bacteria(100);Proteobacteria(100);Deltaproteobacteria(100);Bdellovibrionales(100);Bacteriovoracaeae(100);Halobacteriovorax(100);       |
| Otu0357 | 2  | FTP55_1101_16803_2576__ (reversed)  | Bacteria(100);Proteobacteria(100);Gammaproteobacteria(100);unclassified(100);unclassified(100);unclassified(100);                      |
| Otu0358 | 2  | FTP55_1101_16754_18066__ (reversed) | Bacteria(100);Proteobacteria(100);Alphaproteobacteria(100);Rhodobacterales(100);Rhodobacteraceae(100);Labrenzia(100);                  |
| Otu0359 | 4  | FTP55_1101_13524_2080__ (reversed)  | Bacteria(100);Bacteroidetes(100);Flavobacteria(100);Flavobacteriales(100);Cryomorphaceae(100);Owenweeksia(100);                        |
| Otu0360 | 6  | FTP55_1101_13632_24668__ (reversed) | Bacteria(100);Bacteroidetes(100);unclassified(100);unclassified(100);unclassified(100);unclassified(100);                              |
| Otu0361 | 4  | FTP55_1101_13675_3052__ (reversed)  | Bacteria(100);Proteobacteria(100);Gammaproteobacteria(100);unclassified(100);unclassified(100);unclassified(100);                      |
| Otu0362 | 4  | FTP55_1101_13917_2262__ (reversed)  | Bacteria(100);Proteobacteria(100);Deltaproteobacteria(100);Desulfobacteriales(100);Desulfobacteraceae(100);unclassified(100);          |
| Otu0363 | 4  | FTP55_1101_13937_15779__ (reversed) | Bacteria(100);Lentisphaerae(100);Oligosphaeria(100);unclassified(100);unclassified(100);unclassified(100);                             |
| Otu0364 | 2  | FTP55_101_16826_7692__ (reversed)   | Bacteria(100);Proteobacteria(100);Gammaproteobacteria(100);unclassified(100);unclassified(100);unclassified(100);                      |
| Otu0365 | 4  | FTP55_1101_15866_10530__ (reversed) | Bacteria(100);Proteobacteria(100);Gammaproteobacteria(100);Oceanospirillales(100);Oceanospirillaceae(100);unclassified(100);           |
| Otu0366 | 2  | FTP55_101_15912_10437__ (reversed)  | Bacteria(100);Proteobacteria(100);Deltaproteobacteria(100);Bdellovibrionales(100);Bdellovibrionaceae(100);DM27_clade(100);             |
| Otu0367 | 15 | FTP55_1101_17412_9310__ (reversed)  | Bacteria(100);Proteobacteria(100);Alphaproteobacteria(100);Rickettsiales(100);S25-593(100);unclassified(100);                          |
| Otu0368 | 4  | FTP55_1101_19629_14903__ (reversed) | Bacteria(100);Proteobacteria(100);Gammaproteobacteria(100);Oceanospirillales(100);Oleiphilaceae(100);Oleiphilus(100);                  |
| Otu0369 | 4  | FTP55_1101_19655_9411__ (reversed)  | Bacteria(100);unclassified(100);unclassified(100);unclassified(100);unclassified(100);unclassified(100);                               |
| Otu0370 | 2  | FTP55_1101_16632_17718__ (reversed) | Bacteria(100);Proteobacteria(100);Gammaproteobacteria(100);Alteromonadales(100);Pseudoalteromonadaceae(100);Algicola(100);             |
| Otu0371 | 4  | FTP55_1101_20441_12228__ (reversed) | Bacteria(100);Proteobacteria(100);Alphaproteobacteria(100);Rhodobacterales(100);Rhodobacteraceae(100);unclassified(100);               |
| Otu0372 | 4  | FTP55_1101_22978_11852__ (reversed) | Bacteria(100);Bacteroidetes(100);Flavobacteria(100);Flavobacteriales(100);Flavobacteriaceae(100);N55_marine_group(100);                |
| Otu0373 | 4  | FTP55_1101_23100_9039__ (reversed)  | Bacteria(100);Bacteroidetes(100);Flavobacteria(100);Flavobacteriales(100);Cryomorphaceae(100);Owenweeksia(100);                        |
| Otu0374 | 12 | FTP55_1101_8031_2530__ (reversed)   | Bacteria(100);Proteobacteria(100);Flavobacteria(100);Flavobacteriales(100);Flavobacteriaceae(100);Aquibacter(100);                     |
| Otu0375 | 12 | FTP55_1101_5135_20450__ (reversed)  | Bacteria(100);Marinimicrobia (SAR406_clade)(100);unclassified(100);unclassified(100);unclassified(100);unclassified(100);              |
| Otu0376 | 2  | FTP55_1101_12547_14674__ (reversed) | Bacteria(100);Proteobacteria(100);Deltaproteobacteria(100);Desulfobacteriales(100);Desulfobacteraceae(100);Desulfovibrio(100);         |
| Otu0377 | 4  | FTP55_1101_23944_4555__ (reversed)  | Bacteria(100);Proteobacteria(100);Deltaproteobacteria(100);SAR324_clade(Marine_group_B)(100);unclassified(100);unclassified(100);      |
| Otu0378 | 2  | FTP55_1101_16458_18111__ (reversed) | Bacteria(100);Proteobacteria(100);Gammaproteobacteria(100);unclassified(100);unclassified(100);unclassified(100);                      |
| Otu0379 | 4  | FTP55_1101_25441_14823__ (reversed) | Bacteria(100);Bacteroidetes(100);Sphingobacteria(100);Sphingobacteriales(100);Saprospiraceae(100);unclassified(100);                   |
| Otu0380 | 4  | FTP55_1101_26883_12135__ (reversed) | Bacteria(100);unclassified(100);unclassified(100);unclassified(100);unclassified(100);unclassified(100);                               |
| Otu0381 | 2  | FTP55_101_15118_26030__ (reversed)  | Bacteria(100);Proteobacteria(100);Gammaproteobacteria(100);Thiotrichales(100);Thiotrichaceae(100);unclassified(100);                   |
| Otu0382 | 4  | FTP55_1101_3711_9253__ (reversed)   | Bacteria(100);Proteobacteria(100);Alphaproteobacteria(100);unclassified(100);unclassified(100);unclassified(100);                      |
| Otu0383 | 12 | FTP55_1101_15132_8174__ (reversed)  | Bacteria(100);Gracilibacteria(100);unclassified(100);unclassified(100);unclassified(100);unclassified(100);                            |
| Otu0384 | 4  | FTP55_1101_4495_7193__ (reversed)   | Bacteria(100);Proteobacteria(100);Alphaproteobacteria(100);DB1-14(100);unclassified(100);unclassified(100);                            |
| Otu0385 | 2  | FTP55_101_14765_5997__ (reversed)   | Bacteria(100);Proteobacteria(100);Deltaproteobacteria(100);Desulfobacteriales(100);Desulfobulbaceae(100);unclassified(100);            |
| Otu0386 | 15 | FTP55_1101_13740_13697__ (reversed) | Bacteria(100);Proteobacteria(100);Gammaproteobacteria(100);unclassified(100);unclassified(100);unclassified(100);                      |
| Otu0387 | 12 | FTP55_1101_12500_5137__ (reversed)  | Bacteria(100);Proteobacteria(100);Gammaproteobacteria(100);Oceanospirillales(100);SAR86_clade(100);unclassified(100);                  |
| Otu0388 | 2  | FTP55_1101_16332_11081__ (reversed) | Bacteria(100);Proteobacteria(100);Gammaproteobacteria(100);unclassified(100);unclassified(100);unclassified(100);                      |
| Otu0389 | 4  | FTP55_1102_8909_10206__ (reversed)  | Bacteria(100);Bacteroidetes(100);Flavobacteria(100);Flavobacteriales(100);Flavobacteriaceae(100);N54_marine_group(100);                |
| Otu0390 | 4  | FTP55_1102_9040_7344__ (reversed)   | Bacteria(100);Proteobacteria(100);unclassified(100);unclassified(100);unclassified(100);unclassified(100);                             |
| Otu0391 | 2  | FTP55_1101_16151_10482__ (reversed) | Bacteria(100);Proteobacteria(100);Alphaproteobacteria(100);Rhodobacterales(100);Rhodobacteraceae(100);unclassified(100);               |
| Otu0392 | 11 | FTP55_1102_11792_3434__ (reversed)  | Bacteria(100);Proteobacteria(100);Gammaproteobacteria(100);Oceanospirillales(100);Oceanospirillaceae(100);Marinobacterium(100);        |
| Otu0393 | 5  | FTP55_1101_12323_7419__ (reversed)  | Bacteria(100);Proteobacteria(100);Gammaproteobacteria(100);unclassified(100);unclassified(100);unclassified(100);                      |
| Otu0394 | 5  | FTP55_1101_12372_11814__ (reversed) | Bacteria(100);Proteobacteria(100);Deltaproteobacteria(100);Oligoflexales(100);Oligoflexaceae(100);unclassified(100);                   |
| Otu0395 | 2  | FTP55_1101_13164_8951__ (reversed)  | Bacteria(100);unclassified(100);unclassified(100);unclassified(100);unclassified(100);unclassified(100);                               |
| Otu0396 | 5  | FTP55_1101_14338_22436__ (reversed) | Bacteria(100);Proteobacteria(100);unclassified(100);unclassified(100);unclassified(100);unclassified(100);                             |
| Otu0397 | 5  | FTP55_1101_19111_9134__ (reversed)  | Bacteria(100);Bacteroidetes(100);unclassified(100);unclassified(100);unclassified(100);unclassified(100);                              |
| Otu0398 | 5  | FTP55_1101_22119_17373__ (reversed) | Bacteria(100);Bacteroidetes(100);Flavobacteria(100);Flavobacteriales(100);Cryomorphaceae(100);Fluvicola(100);                          |
| Otu0399 | 5  | FTP55_1101_24439_6959__ (reversed)  | Bacteria(100);Bacteroidetes(100);unclassified(100);unclassified(100);unclassified(100);unclassified(100);                              |
| Otu0400 | 2  | FTP55_101_10903_5724__ (reversed)   | Bacteria(100);Proteobacteria(100);Gammaproteobacteria(100);Cellvibrionales(100);Cellvibrionaceae(100);Simidiua(100);                   |
| Otu0401 | 5  | FTP55_1102_18168_2785__ (reversed)  | Bacteria(100);Bacteroidetes(100);Bacteroidia(100);Bacteroidia_Incertae_Sedis(100);Dracolibacteriaceae(100);Dracolibacterium(100);      |
| Otu0402 | 11 | FTP55_101_12620_25473__ (reversed)  | Archaea(100);Euryarchaeota(100);Thermoplasmata(100);Thermoplasmatales(100);Marine_Group_II(100);unclassified(100);                     |
| Otu0403 | 11 | FTP55_1101_18343_28778__ (reversed) | Bacteria(100);Proteobacteria(100);Gammaproteobacteria(100);Oceanospirillales(100);Oceanospirillaceae(100);Litoribacillus(100);         |
| Otu0404 | 6  | FTP55_1101_8445_8224__ (reversed)   | Bacteria(100);Proteobacteria(100);Epsilonproteobacteria(100);Campylobacteriales(100);Campylobacteraceae(100);Arcobacter(100);          |
| Otu0405 | 6  | FTP55_1101_17101_25748__ (reversed) | Bacteria(100);Bacteroidetes(100);Flavobacteria(100);Flavobacteriales(100);N57_marine_group(100);unclassified(100);                     |
| Otu0406 | 6  | FTP55_1101_20848_4399__ (reversed)  | Bacteria(100);Proteobacteria(100);Gammaproteobacteria(100);unclassified(100);unclassified(100);unclassified(100);                      |
| Otu0407 | 6  | FTP55_1101_21869_11920__ (reversed) | Bacteria(100);Proteobacteria(100);Gammaproteobacteria(100);Alteromonadales(100);Pseudoalteromonadaceae(100);Algicola(100);             |
| Otu0408 | 6  | FTP55_1101_22474_4312__ (reversed)  | Bacteria(100);Bacteroidetes(100);unclassified(100);unclassified(100);unclassified(100);unclassified(100);                              |
| Otu0409 | 6  | FTP55_1101_24187_5079__ (reversed)  | Bacteria(100);Bacteroidetes(100);Flavobacteria(100);Flavobacteriales(100);Cryomorphaceae(100);Owenweeksia(100);                        |
| Otu0410 | 6  | FTP55_1101_25972_7812__ (reversed)  | Bacteria(100);Proteobacteria(100);Gammaproteobacteria(100);Salinisphaerales(100);Salinisphaeraceae(100);ZD0417_marine_group(100);      |
| Otu0411 | 6  | FTP55_1101_26353_10014__ (reversed) | Bacteria(100);Proteobacteria(100);Epsilonproteobacteria(100);Campylobacteriales(100);Campylobacteraceae(100);Arcobacter(100);          |
| Otu0412 | 2  | FTP55_101_10673_9518__ (reversed)   | Bacteria(100);Proteobacteria(100);Gammaproteobacteria(100);Thiotrichales(100);Francisellaceae(100);Francisella(100);                   |
| Otu0413 | 2  | FTP55_1101_15282_20822__ (reversed) | Bacteria(100);Proteobacteria(100);Epsilonproteobacteria(100);Campylobacteriales(100);Campylobacteraceae(100);Arcobacter(100);          |
| Otu0414 | 6  | FTP55_1102_11263_5438__ (reversed)  | Bacteria(100);Proteobacteria(100);Epsilonproteobacteria(100);Campylobacteriales(100);Helicobacteraceae(100);Sulfurovum(100);           |
| Otu0415 | 10 | FTP55_1102_24758_10891__ (reversed) | Bacteria(100);Proteobacteria(100);Gammaproteobacteria(100);Alteromonadales(100);Ferrimonadaceae(100);Ferrimonas(100);                  |
| Otu0416 | 6  | FTP55_1102_15663_17759__ (reversed) | Bacteria(100);Proteobacteria(100);Deltaproteobacteria(100);Bdellovibrionales(100);Bdellovibrionaceae(100);DM27_clade(100);             |
| Otu0417 | 10 | FTP55_1102_22329_14339__ (reversed) | Bacteria(100);Proteobacteria(100);Gammaproteobacteria(100);NK85(100);unclassified(100);unclassified(100);                              |
| Otu0418 | 2  | FTP55_1101_15090_26781__ (reversed) | Bacteria(100);Proteobacteria(100);Gammaproteobacteria(100);Oceanospirillales(100);unclassified(100);unclassified(100);                 |
| Otu0419 | 10 | FTP55_1102_11941_9712__ (reversed)  | Bacteria(100);Bacteroidetes(100);unclassified(100);unclassified(100);unclassified(100);unclassified(100);                              |
| Otu0420 | 6  | FTP55_1102_20412_11797__ (reversed) | Bacteria(100);Proteobacteria(100);Gammaproteobacteria(100);Cellvibrionales(100);Cellvibrionaceae(100);Pseudomarcivivus(100);           |
| Otu0421 | 2  | FTP55_1101_14267_13671__ (reversed) | Bacteria(100);Proteobacteria(100);Gammaproteobacteria(100);unclassified(100);unclassified(100);unclassified(100);                      |
| Otu0422 | 7  | FTP55_101_11961_3035__ (reversed)   | Bacteria(100);Proteobacteria(100);Epsilonproteobacteria(100);Campylobacteriales(100);Helicobacteraceae(100);RS-M59_termite_group(100); |
| Otu0423 | 7  | FTP55_101_6221_6244__ (reversed)    | Bacteria(100);Proteobacteria(100);Epsilonproteobacteria(100);Campylobacteriales(100);Campylobacteraceae(100);Sulfurospirillum(100);    |
| Otu0424 | 7  | FTP55_1101_16269_10580__ (reversed) | Bacteria(100);Proteobacteria(100);Gammaproteobacteria(100);Oceanospirillales(100);SAR86_clade(100);unclassified(100);                  |
| Otu0425 | 11 | FTP55_1101_22317_10622__ (reversed) | Bacteria(100);Firmicutes(100);Clostridia(100);Clostridiales(100);Family_XIII(100);Fusibacter(100);                                     |
| Otu0426 | 7  | FTP55_1101_25222_12679__ (reversed) | Bacteria(100);Proteobacteria(100);Alphaproteobacteria(100);Rickettsiales(100);SAR116_clade(100);unclassified(100);                     |
| Otu0427 | 7  | FTP55_1101_26089_15281__ (reversed) | Bacteria(100);Bacteroidetes(100);Bacteroidia(100);Bacteroidales(100);Marinilabiaceae(100);Marinifilium(100);                           |
| Otu0428 | 7  | FTP55_1101_4642_11894__ (reversed)  | Bacteria(100);unclassified(100);unclassified(100);unclassified(100);unclassified(100);unclassified(100);                               |
| Otu0429 | 9  | FTP55_1102_26567_15754__ (reversed) | Bacteria(100);Proteobacteria(100);Alphaproteobacteria(100);SAR11_clade(100);unclassified(100);unclassified(100);                       |
| Otu0430 | 8  | FTP55_101_13735_15466__ (reversed)  | Bacteria(100);Proteobacteria(100);Epsilonproteobacteria(100);Campylobacteriales(100);Helicobacteraceae(100);Sulfurovum(100);           |

|         |                                      |                                                                                                                                       |
|---------|--------------------------------------|---------------------------------------------------------------------------------------------------------------------------------------|
| Otu0431 | 8 FTP55_1101_14576_8251_(reversed)   | Bacteria(100);Proteobacteria(100);Alphaproteobacteria(100);Rhodobacterales(100);Rhodobacteraceae(100);unclassified(100);              |
| Otu0432 | 8 FTP55_1101_20566_2331_(reversed)   | Bacteria(100);Fusobacteria(100);Fusobacteriia(100);Fusobacteriales(100);Fusobacteriaceae(100);Cetobacterium(100);                     |
| Otu0433 | 10 FTP55_1101_17573_20759_(reversed) | Bacteria(100);Proteobacteria(100);Deltaproteobacteria(100);Desulfovibrionales(100);Desulfovibrionaceae(100);Desulfovibrio(100);       |
| Otu0434 | 8 FTP55_1101_26614_18965_(reversed)  | Bacteria(100);Proteobacteria(100);Gammaproteobacteria(100);Cellvibrionales(100);Cellvibrionaceae(100);unclassified(100);              |
| Otu0435 | 8 FTP55_1101_7596_10787_(reversed)   | Bacteria(100);Proteobacteria(100);Gammaproteobacteria(100);Alteromonadales(100);Alteromonadaceae(100);Marinobacter(100);              |
| Otu0436 | 9 FTP55_1101_10579_12643_(reversed)  | Bacteria(100);Proteobacteria(100);Alphaproteobacteria(100);Rhodospirillales(100);Rhodospirillaceae(100);AEGEAN-169_marine_group(100); |
| Otu0437 | 10 FTP55_102_9908_19722_(reversed)   | Bacteria(100);Proteobacteria(100);Epsilonproteobacteria(100);Campylobacteriales(100);Helicobacteraceae(100);Sulfurimonas(100);        |
| Otu0438 | 2 FTP55_1101_15059_13708_(reversed)  | Bacteria(100);Bacteroidetes(100);Flavobacteriia(100);Flavobacteriales(100);NS9_marine_group(100);unclassified(100);                   |
| Otu0439 | 9 FTP55_1101_16561_18036_(reversed)  | Bacteria(100);Bacteroidetes(100);Flavobacteriia(100);Flavobacteriales(100);Flavobacteriaceae(100);Nonlabens(100);                     |
| Otu0440 | 9 FTP55_1101_18458_18934_(reversed)  | Bacteria(100);Proteobacteria(100);Gammaproteobacteria(100);Alteromonadales(100);Pseudoalteromonadaceae(100);Algicola(100);            |
| Otu0441 | 2 FTP55_1101_14792_10734_(reversed)  | Bacteria(100);Proteobacteria(100);Epsilonproteobacteria(100);Campylobacteriales(100);Helicobacteraceae(100);Sulfurovum(100);          |
| Otu0442 | 17 FTP55_1101_23568_6348_(reversed)  | Bacteria(100);Proteobacteria(100);Gammaproteobacteria(100);Oceanospirillales(100);Oceanospirillaceae(100);Neptuniibacter(100);        |
| Otu0443 | 9 FTP55_1102_10110_15101_(reversed)  | Bacteria(100);Bacteroidetes(100);Flavobacteriia(100);Flavobacteriales(100);Cryomorphaceae(100);Owenweeksia(100);                      |
| Otu0444 | 11 FTP55_1101_7376_5602_(reversed)   | Bacteria(100);Proteobacteria(100);Epsilonproteobacteria(100);Campylobacteriales(100);Campylobacteraceae(100);Arcobacter(100);         |
| Otu0445 | 9 FTP55_1101_8234_11233_(reversed)   | Bacteria(100);Proteobacteria(100);Deltaproteobacteria(100);Oligoflexales(100);Oligoflexaceae(100);unclassified(100);                  |

## Supplementary Data 4

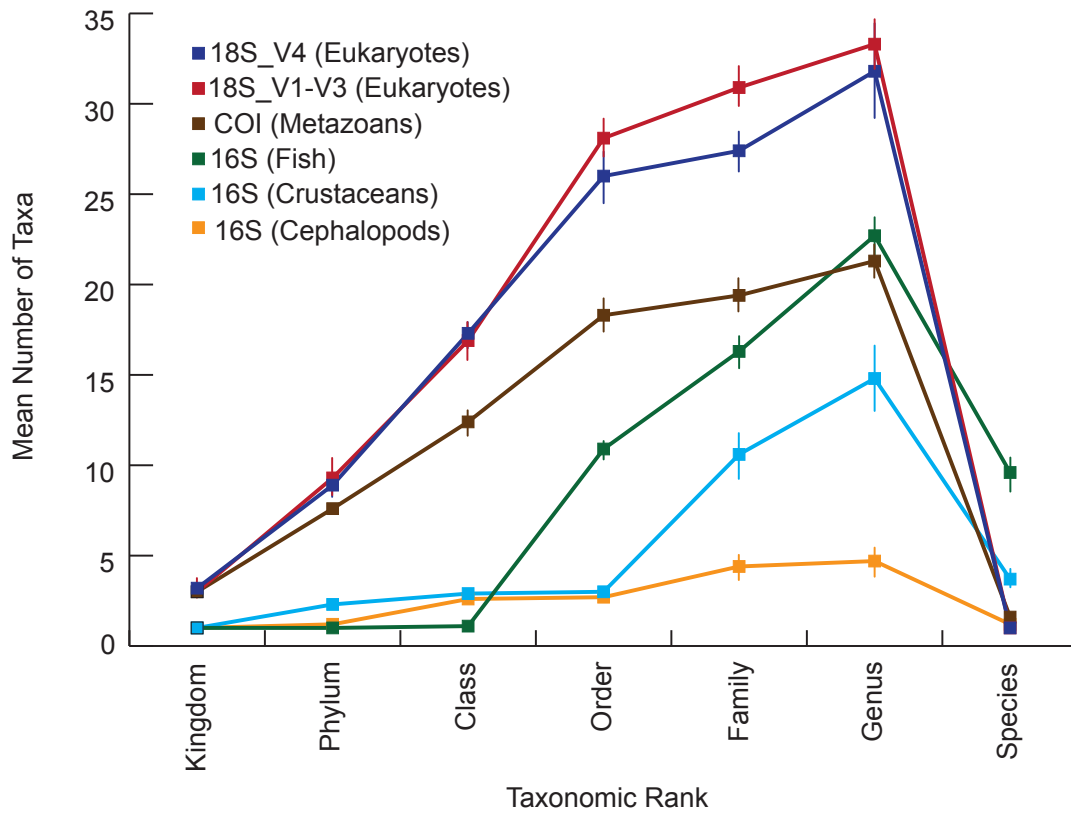

**Line graph representing the mean number of eukaryotic taxa recorded at Coral Bay using eDNA.** Coloured lines indicate the mean number of taxa identified for each taxonomic rank for six PCR assays that target eukaryotes. Sequences were normalised across each sample and assay to 2363 sequences. Vertical lines represent the standard error.

## Supplementary Data 5

Rarefaction plots depicting the number of sequences recovered for each of the nine PCR assays that target eukaryotes and the relationship to the number of taxa (i.e. families or genera) recovered. Rarefaction lines are in red with 95% upper and lower confidence limits in grey.

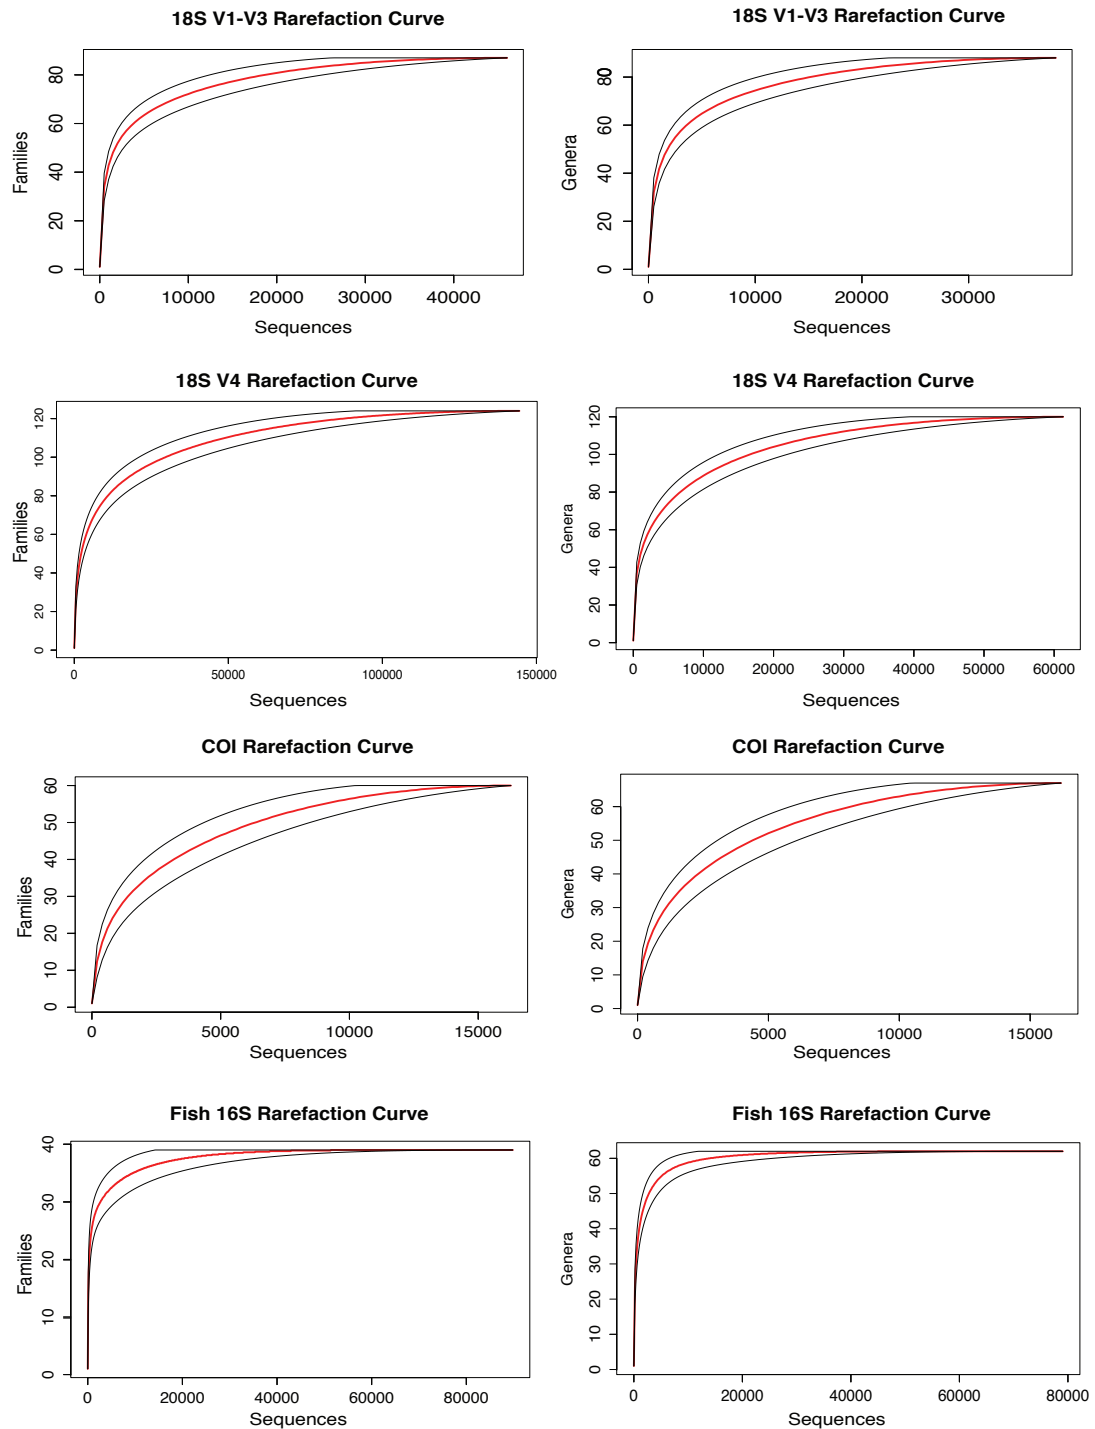

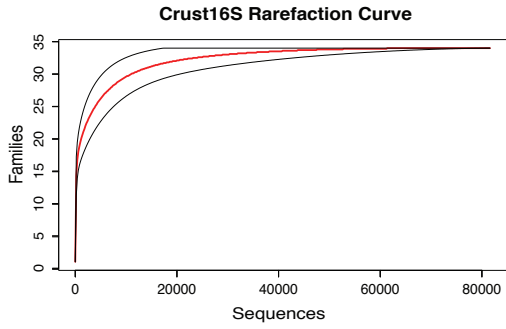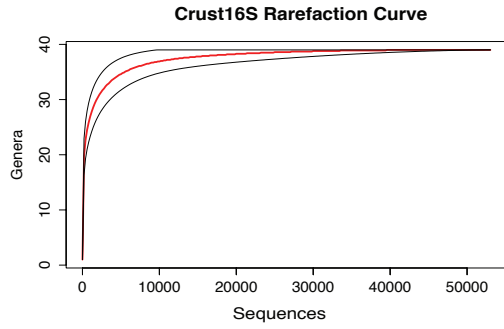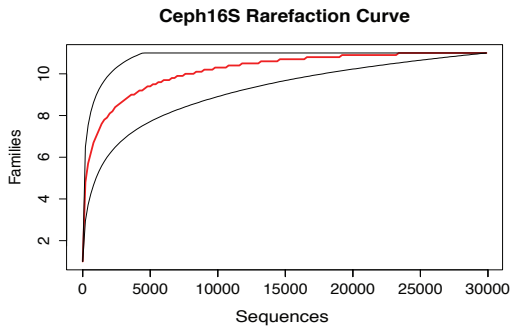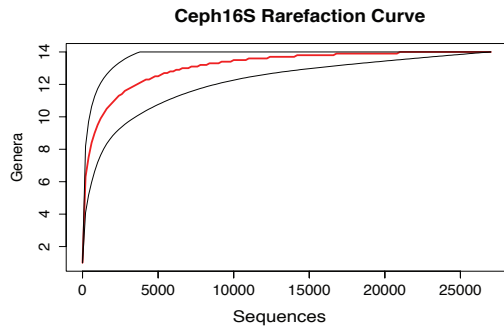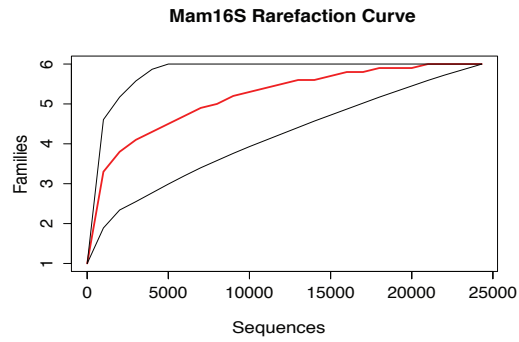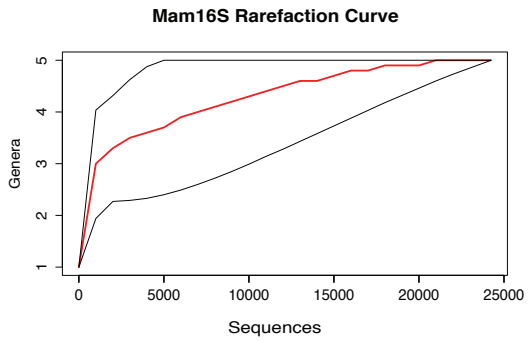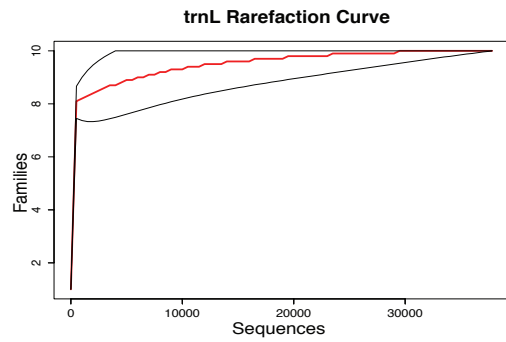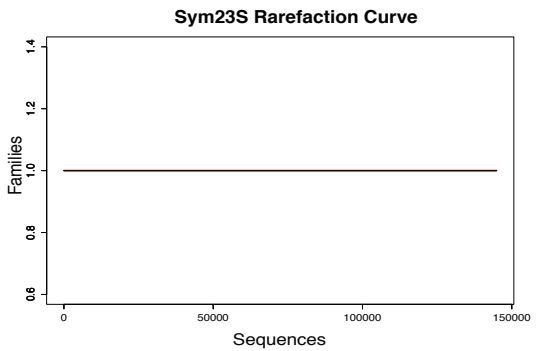

**Supplementary Data 6.** Primer sets used in the amplification of eDNA sampled from Coral Bay seawater.

| Primer Name                            | Oligonucleotide Sequence                                             | PCR Annealing Temp. °C | Target taxa         | Region                   | Amplicon Size (bp) | Primer Reference                             |
|----------------------------------------|----------------------------------------------------------------------|------------------------|---------------------|--------------------------|--------------------|----------------------------------------------|
| 18S_1F<br>18S_400R                     | 5' GCCAGTAGTCATATGCTTGTCT 3'<br>5' GCCTGCTGCCTTCCTT 3'               | 52, 58, 64             | Eukaryotes          | nuclear<br>18S rDNA      | 336-423            | Pochon et al. 2013                           |
| 18S_V4F<br>18S_V4R                     | 5' GCAGTAAAAAGCTCGTAG 3'<br>5' TCCAAGAATTRCACCTCT 3'                 | 50, 55, 60             | Eukaryotes          | nuclear<br>18S rDNA      | 240-420            | This study                                   |
| mlCOIintF<br>jgHCO2198                 | 5' GGWACWGGWTGAACWGTWTAYCCYCC 3'<br>5' TAIACYTCIAAYCAYAARGAYATTGG 3' | 46, 51, 56             | Metazoans           | mitochondria<br>COI      | 304-313            | Leray et al. 2013                            |
| 16SF/D<br>16S2R-degenerate             | 5' GACCCTATGGAGCTTTAGAC 3'<br>5' CGCTGTTATCCCTADRGTAAC 3'            | 54                     | Fish                | mitochondria<br>16S rDNA | 178-228            | Berry et al. 2017<br>Deagle et al. 2007      |
| 16Smam1<br>16Smam2                     | 5' CGGTTGGGGTGACCTCGGA 3'<br>5' GCTGTTATCCCTAGGGTAACT 3'             | 57                     | Mammals             | mitochondria<br>16S rDNA | 86-116             | Taylor 1996                                  |
| Crust16S_F(short)<br>Crust16S_R(short) | 5' GGGACGATAAGACCCTATA 3'<br>5' ATTACGCTGTTATCCCTAAAAG 3'            | 51                     | Crustaceans         | mitochondria<br>16S rDNA | 90-213             | Berry et al. 2017                            |
| S_Cephalopoda_F<br>S_Cephalopoda_R     | 5' GCTRGAATGAATGGTTTGAC 3'<br>5' TCAWTAGGGTCTTCTCGTCC 3'             | 50                     | Cephalopods         | mitochondria<br>16S rDNA | 70-73              | Peters et al. 2014                           |
| 23SHYPERUP<br>23SHYPERDN               | 5' TCAGTACAAATAATATGCTG 3'<br>5' TTATCGCCCAATTAACAGT 3'              | 50                     | <i>Symbiodinium</i> | chloroplast<br>23S rDNA  | 122-163            | Santos et al. 2003<br>Manning & Gates 2008   |
| trnLc<br>trnLh                         | 5' CGAAATCGGTAGACGCTACG 3'<br>5' CCATTGAGTCTCTGCACCTATC 3'           | 52                     | Plants              | chloroplast<br>trnL      | 122-157            | Taberlet et al. 1991<br>Taberlet et al. 2007 |
| 515F<br>R806                           | 5' GTGCCAGCMGCCGCGGTAA 3'<br>5' GGACTACHVGGGTWCTAAT 3'               | 50                     | Prokaryotes         | 16S rDNA                 | 253-254            | Turner et al. 1999<br>Caporaso et al. 2011   |

Berry, T. E. *et al.* DNA metabarcoding for diet analysis and biodiversity: a case study using the endangered Australian sea lion (*Neophoca cinerea*). *Ecol Evol* **7**, 5435-5453 (2017).

Caporaso, G.J. *et al.* Global patterns of 16S rRNA diversity at a depth of millions of sequences per sample. *PNAS* **108**, S4516-4522 (2011).

Deagle, B. E. *et al.* Studying seabird diet through genetic analysis of faeces: A case study on macaroni penguins (*Eudyptes chrysolophus*). *PLoS One* **2**, e831 (2007).

- Leray, M. *et al.* A new versatile primer set targeting a short fragment of the mitochondrial COI region for metabarcoding metazoan diversity: application for characterizing coral reef fish gut contents. *Front Zool* **10**,34 (2013).
- Manning, M. M., Gates, R. D. Diversity in populations of free-living *Symbiodinium* from a Caribbean and Pacific reef. *Limnol Oceanograph* **53**, 1853-1861 (2008).
- Peters, K. J., Ophelkeller, K., Herdina, Bott, N. J., Goldsworthy, S. D. PCR-based techniques to determine diet of the Australian sea lion (*Neophoca cinerea*): a comparison with morphological analysis. *Mar Ecol* **36**, 1428-1439 (2015).
- Pochon, X., Bott, N. J., Smith, K. F., Wood, S. Evaluating detection limits of next-generation sequencing for the surveillance and monitoring of international marine pests. *PLoS One* **8**, e73935 (2013).
- Santos, S. R., Gutierrez-Rodriguez, C., Coffroth, M. A. Phylogenetic identification of symbiotic dinoflagellates via length heteroplasmy in domain V of chloroplast large subunit (cp23S)-Ribosomal DNA sequences. *Mar Biotechnol* **5**, 130-140 (2003).
- Taberlet, P., Gielly, L., Pautou, G., Bouvet, J. Universal primers for amplification of three regions of chloroplast DNA. *Plant Mol Biol* **17**, 1105-1109 (1991).
- Taberlet, P., *et al.* Power and limitations of the chloroplast *trnL* (UAA) intron for plant DNA barcoding. *Nucleic Acids Res* **35**, e14 (2007).
- Turner, S., Pryer, K. M., Miao, V. P. W., Palmer, J. D. Investigating deep phylogenetic relationships among cyanobacteria and plastids by small subunit rRNA sequence analysis. *J Eukary Microbiol* **46**, 327-338 (1999).
